# Supplementary material for: Base-catalyzed synthesis of aryl amides from aryl azides and aldehydes
Source: Royal Society of Chemistry journal article supplement (doi:10.1039/c5sc03510d), 2015-10-22

## SUPPORTING INFORMATION

# Base-Catalyzed Synthesis of Aryl Amides from Aryl Azides and Aldehydes

Sheng Xie,<sup>a</sup> Yang Zhang,<sup>a</sup> Olof Ramström,<sup>\*,a</sup> and Mingdi Yan<sup>\*,a,b</sup>

<sup>a</sup>Department of Chemistry, KTH - Royal Institute of Technology, Teknikringen 36, S-10044 Stockholm, Sweden

<sup>b</sup>Department of Chemistry, University of Massachusetts Lowell, 1 University Ave., Lowell, MA 01854, USA

\*E-mail: ramstrom@kth.se, Mingdi\_Yan@uml.edu

### Table of Contents

|                                                                                                               |     |
|---------------------------------------------------------------------------------------------------------------|-----|
| General procedures .....                                                                                      | S1  |
| Figure S1. <sup>1</sup> H NMR spectra of model reaction.....                                                  | S2  |
| Figure S2. Azide decomposition temperatures.....                                                              | S2  |
| Table S1. Optimization of conditions for reaction of $\alpha$ -unsubstituted aldehyde with phenyl azide. .... | S3  |
| Synthesis of azides.....                                                                                      | S3  |
| Synthesis of products.....                                                                                    | S7  |
| References .....                                                                                              | S16 |
| Characterization Spectra.....                                                                                 | S18 |

### General procedures

All reagents and solvents were used as received from Sigma Aldrich, Alfa Aesar, Fluka, and Merck. Thin-layer chromatography was conducted using TLC silica gel 60 F<sub>254</sub> (Merck Co.), visualized with ultraviolet light. <sup>1</sup>H-, <sup>13</sup>C- and <sup>19</sup>F-NMR data were recorded on a Bruker Ascend<sup>TM</sup> 400 instrument or a Bruker DMX 500 instrument. Chemical shifts are reported as  $\delta$  values (ppm) with CDCl<sub>3</sub> (<sup>1</sup>H:  $\delta$  = 7.26, <sup>13</sup>C:  $\delta$  = 77.16), DMSO-d<sub>6</sub> (<sup>1</sup>H:  $\delta$  = 2.50, <sup>13</sup>C:  $\delta$  = 39.52) or acetone-d<sub>6</sub> (<sup>1</sup>H:  $\delta$  = 2.05, <sup>13</sup>C:  $\delta$  = 29.84) as the internal standard. <sup>19</sup>F NMR signals were referenced to hexafluorobenzene ( $\delta$  = -161.75 in CDCl<sub>3</sub> or -162.65 in DMSO-d<sub>6</sub>) unless noted otherwise. High resolution electrospray ionization (HRMS-ESI) mass spectrometry data were obtained from the Mass Spectrometry Lab at the University of Illinois at Urbana-Champaign. IR spectra were recorded on ReactIR<sup>TM</sup> IC10 (Mettler Toledo Co.) for liquid samples, or SPECTRUM 2000 (Perkin Elmer) for solid samples in the ATR mode.

**Figure S1. <sup>1</sup>H NMR spectra of model reaction**

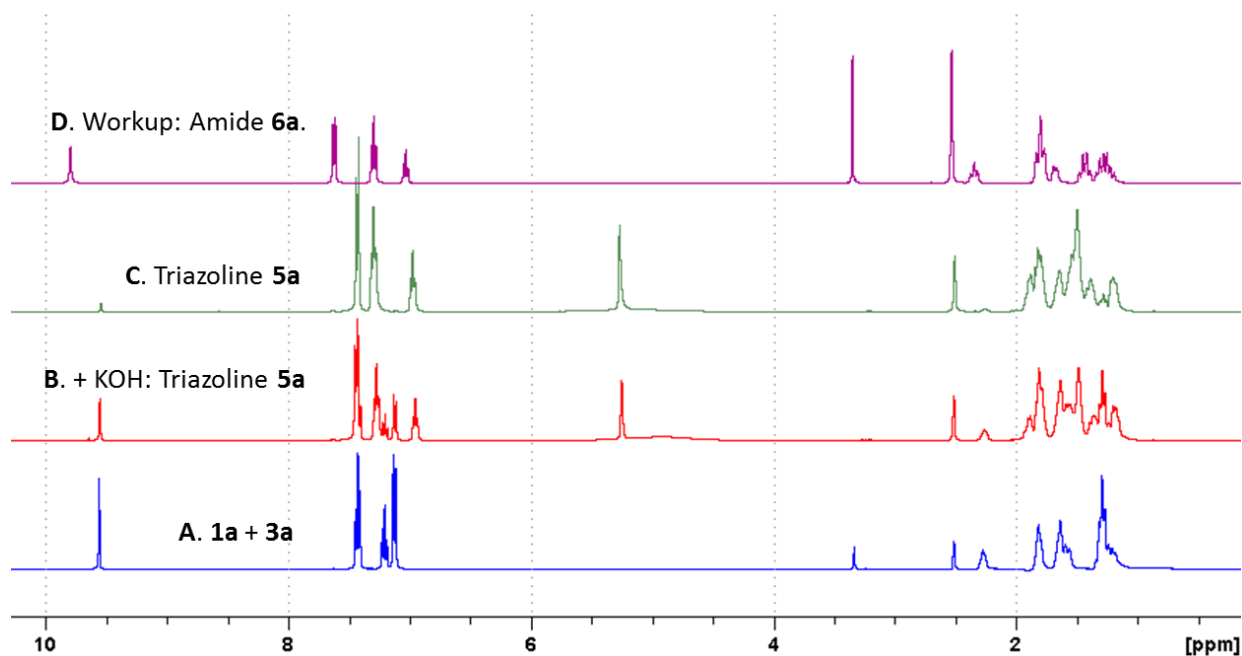

A). Azide and aldehyde in DMSO-d<sub>6</sub>; B). Triazoline **5a** formed after addition of KOH; C). Triazoline **5a** formed exclusively (6 h); D). Aqueous acidic workup yielding amide **6a**.

**Figure S2. Azide decomposition temperatures\***

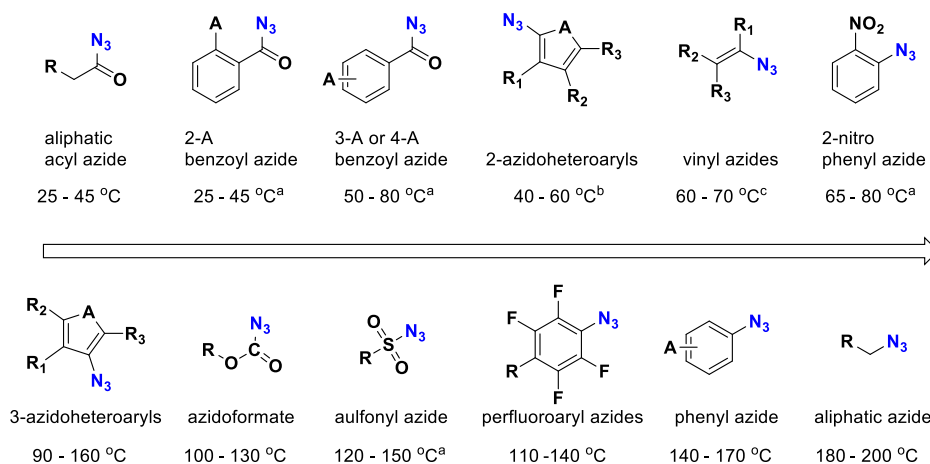

\*The temperature range was determined where the rate constant for the decomposition of azide was  $10^{-5}$  to  $10^{-4}$  s<sup>-1</sup> ( $t_{0.5} = 2 - 24$  h), following the suggestion in ref. 1. <sup>a</sup>Ref. 1 and references therein; <sup>b</sup>ref. 2; <sup>c</sup>ref. 3; <sup>d</sup>ref. 4.

**Table S1. Optimization of conditions for reaction of  $\alpha$ -unsubstituted aldehyde with phenyl azide.<sup>a</sup>**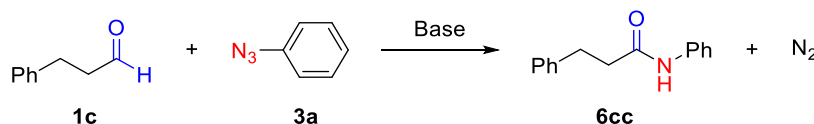

| Entry | Base (eq.)   | Solvent (v:v)             | <b>1c</b> (eq.) | Temp. /Time. | Conv. <sup>b</sup> of <b>3a</b> (%) | Yield <sup>c</sup> of <b>6cc</b> (%) |
|-------|--------------|---------------------------|-----------------|--------------|-------------------------------------|--------------------------------------|
| 1     | t-BuOK (0.5) | THF/ <i>t</i> -BuOH (3:1) | 3.0             | 20 °C/10 min | 10                                  | 8                                    |
| 2     | t-BuOK (1.1) | THF/ <i>t</i> -BuOH (3:1) | 3.0             | 20 °C/6 min  | 70                                  | 48 (66 <sup>d</sup> )                |
| 3     | t-BuOK (1.5) | THF/ <i>t</i> -BuOH (3:1) | 4.0             | 20 °C/5 min  | 71                                  | 57 (86 <sup>d</sup> )                |
| 4     | t-BuOK (2.0) | THF/ <i>t</i> -BuOH (3:1) | 4.0             | 20 °C/5 min  | > 95                                | 68                                   |

<sup>a</sup>Protocol: to a solution of **3a** (1 mmol) and base in THF/*t*-BuOH (1 mL/0.5 mL) under vigorous stirring, aldehyde **1c** in THF (0.5 mL) was added dropwise during 0.5 min. After the reaction was completed, the solution was quenched by aq. AcOH (1.5 M, 2 mL). <sup>b</sup>Determined by <sup>1</sup>H NMR. <sup>c</sup>Isolated yield. <sup>d</sup>Yield based on recycled azide.

### Synthesis of azides

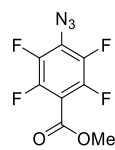 **Methyl 4-azido-2,3,5,6-tetrafluorobenzoate.**<sup>5</sup>**General procedure A:** Methyl pentafluorobenzoate (9.5 g, 40 mmol) was dissolved in a 2:1 (v/v) mixture of acetone and water (90 mL). Sodium azide (3.40 g, 52 mmol, 1.3 equiv.) was added to the flask and the mixture was refluxed at 85 °C for 6 h. The mixture was subsequently cooled to r.t., diluted with water (150 mL), and extracted with diethyl ether (3 x 150 mL). The extract was dried over MgSO<sub>4</sub> and the solvent evaporated under reduced pressure, yielding the product as colorless crystals (9.5 g, 95%). Further purification was performed by flash column chromatography using EtOAc:hexanes (1:40) as the eluent. The compounds were stored in the dark to prevent extensive light exposure. <sup>1</sup>H NMR (400 MHz, CDCl<sub>3</sub>):  $\delta$  3.97 (s, 3H); <sup>13</sup>C NMR (125 MHz, CDCl<sub>3</sub>):  $\delta$  160.0, 145.5 (dm,  $J_{\text{C-F}} = 260.1$  Hz), 140.6 (dm,  $J_{\text{C-F}} = 250.1$  Hz), 123.5, 107.8, 53.4; <sup>19</sup>F NMR (376 MHz, CDCl<sub>3</sub>):  $\delta$  -138.62 (m, 2F), -150.91 (m, 2F).

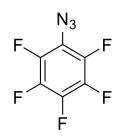 **1-Azido-2,3,4,5,6-pentafluorobenzene.**<sup>6</sup>**General procedure B:** Aniline (20 mmol) was dissolved in TFA (25 mL) and cooled to -2 °C using an immersion cooler. After ~15 min, NaNO<sub>2</sub> (12 mmol) was added in portions while stirring. After stirred at 0 °C for 1h, sodium azide (30 mmol) was added and the mixture was stirred at -2-0 °C for 1h. The mixture was diluted with

Et<sub>2</sub>O (50 mL) and washed with water and then saturated NaHCO<sub>3</sub> and dried over MgSO<sub>4</sub>. After removal of solvent, the residue was purified by flash column using pentane as eluent to give a pale brown liquid in 82% yield. <sup>13</sup>C NMR (125 MHz, CDCl<sub>3</sub>): δ 115.89 (dt, J = 4.63, 12.5 Hz), 138.14 (dm, J = 261.30 Hz), 141.02 (dm, J = 250.0 Hz); <sup>19</sup>F NMR (376 MHz, CDCl<sub>3</sub>): -151.48 (m, 2F), -159.62 (m, 1F), -161.11 (m, 2F).

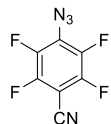

**4-Azido-2,3,5,6-tetrafluorobenzonitrile.** Synthesized according to general procedure A. The product was purified by column chromatography using hexanes:EtOAc mixture as eluent to give a light yellow liquid in 65% yield. <sup>13</sup>C NMR (125 MHz, CDCl<sub>3</sub>): δ 89.1 (t, 1C, CN, J = 17.5 Hz), 107.2 (t, 1C, J = 3.6 Hz), 126.7 (m, 1C), 140.3 (dm, 2C, J<sub>C-F</sub> = 252.4 Hz), 147.5 (dm, 2C, J<sub>C-F</sub> = 261.5 Hz); <sup>19</sup>F NMR (376 MHz, CDCl<sub>3</sub>): δ -132.05 (m, 2F), -148.68 (m, 2F).

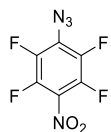

**1-Azido-2,3,5,6-tetrafluoro-4-nitrobenzene.** Synthesized according to general procedure A. The product was purified by column chromatography using hexanes:EtOAc (70:1) mixture as eluent to give a pale yellow liquid in 67% yield. <sup>13</sup>C NMR (100 MHz, CDCl<sub>3</sub>): δ 125.4 (t, 1C, J = 3.6 Hz), 126.6 (m, 1C), 140.7 (dm, 2C, J<sub>C-F</sub> = 252.0 Hz), 141.4 (dm, 2C, J<sub>C-F</sub> = 264.0 Hz); <sup>19</sup>F NMR (376 MHz, CDCl<sub>3</sub>): δ -145.65 (m, 2F), -148.76 (m, 2F).

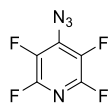

**4-Azido-2,3,5,6-tetrafluoropyridine.**<sup>7</sup> The product was purified by distillation using a Büchi Kügelrohr apparatus to give a colorless liquid in 68% yield. <sup>13</sup>C NMR (125 MHz, CDCl<sub>3</sub>): δ 132.2 (m, C<sub>(4)</sub>-N<sub>3</sub>), 135.4 (dm, 2C, J<sub>C-F</sub> = 261.8 Hz), 143.6 (dm, 2C, J<sub>C-F</sub> = 244.1 Hz). <sup>19</sup>F NMR (376 MHz, CDCl<sub>3</sub>): δ -89.59 (m, 2F), -152.91 (m, 2F).

**Phenyl Azide (6).**<sup>8</sup> **General procedure C:** To a 250 mL round-bottom flask, charged with aniline (0.02 mol) and water (40 mL), was added concentrated HCl (20.0 mL, 0.21 mol) under vigorous stirring while cooling using an immersion cooler. After stirring at -2 °C for 20-30 min, a freshly prepared, ice-cold solution of sodium nitrite (1.9 g, 0.03 mol) in water (10 mL) was added dropwise and the mixture was stirred for an additional 10-20 min. A freshly prepared solution of sodium azide (2.5 g, 0.03 mol) in water (20 mL) was then added dropwise to the reaction mixture while maintaining the temperature below 5 °C, after which the reaction mixture was stirred for an additional 20–30 min at 0 °C, followed by stirring at rt for 1 h. Afterwards, the solution was extracted with EtOAc (50 mL x 3), washed with saturated NaHCO<sub>3</sub> solution and brine (75 mL), and dried over Na<sub>2</sub>SO<sub>4</sub>. After removal of solvent, the crude mixture was purified by column chromatography using hexanes as eluent to give an orange oil in 63% yield. <sup>1</sup>H NMR (400 MHz, CDCl<sub>3</sub>): δ 7.04 (d, 2H, J=8.2 Hz), 7.15 (t, 1H, J=8.2 Hz), 7.36 (t, 2H, J=8.2 Hz); <sup>13</sup>C NMR (125 MHz, CDCl<sub>3</sub>): δ 119.1 (2C), 124.9, 129.8 (2C), 140.0.

**Benzyl azide.**<sup>9</sup> The product was purified by column chromatography using pentane to give a colorless oil in 90% yield. <sup>1</sup>H NMR (400 MHz, CDCl<sub>3</sub>): δ 7.35 (m, 5H, Ar), 4.35 (s, 2H, CH<sub>2</sub>); <sup>13</sup>C NMR (125 MHz, CDCl<sub>3</sub>): δ 146.3, 135.6, 130.4, 127.6, 21.8.

**Tosyl Azide.**<sup>10</sup> Colorless oil in 98% yield. <sup>1</sup>H NMR (500 MHz, CDCl<sub>3</sub>): δ 2.48 (s, 3H, CH<sub>3</sub>), 7.41 (d, 2H, J=8.4 Hz), 7.84 (d, 2H, J=8.4 Hz). <sup>13</sup>C NMR (125 MHz, CDCl<sub>3</sub>): δ 21.8, 127.6 (2C), 130.3 (2C), 135.6, 146.4.

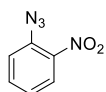

**1-Azido-2-nitrobenzene.**<sup>11</sup> A mixture of *o*-nitroaniline (2.8 g, 0.02 mol), water (80 ml) and concentrated hydrochloric acid (45 mL, 0.54 mmol) was placed in a 500 mL flask. The flask was cooled to 0°C and sodium nitrite (1.45 g, 0.021 mol) in water (10 mL) was added dropwise. After 30 min stirring at 0°C, sodium azide (13.0 g, 0.20 mol) in water (10 mL) was added dropwise, during which the product precipitated out as an off-white solid. After the nitrogen evolution had ceased, the product was collected on a Büchner funnel and washed twice with ice-cold water and then dried in air overnight to give the product as pale yellow needles (2.1 g, 88 %). <sup>13</sup>C NMR (125 MHz, CDCl<sub>3</sub>): δ 140.9, 134.8, 134.1, 126.1, 125.1, 120.8; <sup>1</sup>H NMR (400 MHz, CDCl<sub>3</sub>): δ 7.92 (dd, 1H, J = 8.1, 1.5 Hz), 7.60 (dt, 1H, J = 7.9, 1.4 Hz), 7.31 (dd, 1H, J = 8.4, 1.0 Hz), 7.23 (dt, 1H, J = 7.7, 1.1 Hz).

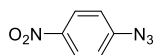

**1-Azido-4-nitrobenzene.**<sup>12</sup> (0.02 mol scale) Synthesized according to general procedure C. The product was purified by column chromatography using hexanes: DCM 1:1 mixture as eluent to give a yellow white solid in 48% yield (1.5 g). <sup>13</sup>C NMR (125 MHz, CDCl<sub>3</sub>): δ 146.9, 144.6, 125.6, 119.4; <sup>1</sup>H NMR (400 MHz, CDCl<sub>3</sub>): δ 8.24 (dm, 2H, J = 8.9 Hz), 7.14 (dm, 2H, J = 9.0 Hz).

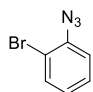

**1-Azido-2-bromobenzene.**<sup>12</sup> (0.02 mol scale) Synthesized according to general procedure B. The product was purified by column chromatography using hexanes as eluent to give a light yellow liquid in 90 % yield. <sup>13</sup>C NMR (125 MHz, CDCl<sub>3</sub>): δ 138.7, 134.0, 128.7, 126.1, 119.5, 114.0; <sup>1</sup>H NMR (400 MHz, CDCl<sub>3</sub>): δ 7.55 (dd, 1H, J = 8.0, 1.1 Hz), 7.34 (app t, 1H, J = 7.6 Hz), 7.17 (dd, 1H, J = 8.0, 1.1 Hz), 7.01 (app t, 1H, J = 7.6 Hz).

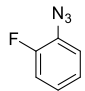

**1-Azido-2-fluorobenzene.**<sup>13</sup> (0.02 mol scale) Synthesized according to general procedure B. The product was purified by column chromatography using hexanes as eluent to give a light yellow liquid in 68% yield. <sup>1</sup>H NMR (400 MHz, CDCl<sub>3</sub>): δ 7.10 (m, 4H, J = 8.0); <sup>13</sup>C NMR (100 MHz, CDCl<sub>3</sub>): δ 154.9 (d, J = 249 Hz), 127.9 (d, J = 11 Hz), 125.8 (d, J = 7 Hz), 124.9 (d, J = 4 Hz), 121.0, 116.7 (d, J = 19 Hz); <sup>19</sup>F NMR (376 MHz, CDCl<sub>3</sub>): δ -126.25 (s).

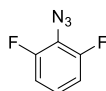

**1-azido-2,6-difluorobenzene.**<sup>13</sup> (0.02 mol scale) Synthesized according to general procedure B. The product was purified by column chromatography using hexanes as eluent to give white crystals in 33% yield. <sup>1</sup>H NMR (400 MHz, CDCl<sub>3</sub>): δ 7.02 (m, 1 H), 6.89 (m, 2 H); <sup>13</sup>C NMR (100 MHz, CDCl<sub>3</sub>): δ 155.8 (dd, J = 4, 250 Hz), 124.8 (t, J = 9 Hz), 117.5 (t, J = 14 Hz), 112.1 (dd, J = 5, 18 Hz); <sup>19</sup>F NMR (376 MHz, CDCl<sub>3</sub>): δ -122.80 (s, 2F).

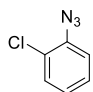

**1-Azido-2-chlorobenzene.**<sup>14</sup> (0.02 mol scale) Synthesized according to general procedure C. The product was purified by column chromatography using pentane as eluent to give a light yellow liquid in 88% yield. <sup>1</sup>H NMR (400 MHz, CDCl<sub>3</sub>): δ 7.31 (d, 2H, J = 8.7 Hz), 6.96 (d, 2H, J = 8.7 Hz). <sup>13</sup>C NMR (100 MHz, CDCl<sub>3</sub>): δ 138.7, 130.2, 129.8, 120.3.

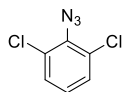

**1-Azido-2,6-dichlorobenzene.**<sup>15</sup> (0.02 mol scale) Synthesized according to general procedure B. The product was purified by column chromatography using pentane as eluent to give a light yellow oil in 67% yield. <sup>1</sup>H NMR (400 MHz, CDCl<sub>3</sub>): δ 7.30 (d, 2H, J = 8.2 Hz), 7.05 (t, 1H, J = 8.2 Hz); <sup>13</sup>C NMR (125 MHz, CDCl<sub>3</sub>): δ 134.2, 129.6, 129.0, 126.4.

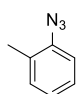

**1-Azido-2-methylbenzene.**<sup>16</sup>(0.02 mol scale) Synthesized according to general procedure C.

The product was purified by column chromatography using pentane as eluent to give a light yellow liquid in 81% yield. <sup>1</sup>H NMR (400 MHz, CDCl<sub>3</sub>): δ 7.26 (t, 1H, J = 7.4 Hz), 7.19 (d, 1H, J = 7.3 Hz), 7.15 (d, 1H, J = 7.3 Hz), 7.07 (t, 1H, J = 7.4 Hz); <sup>13</sup>C NMR (100 MHz, CDCl<sub>3</sub>): δ 138.4, 131.1, 129.6, 127.1, 124.6, 117.9, 17.2.

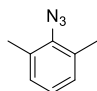

**1-Azido-2,6-dimethylbenzene.**<sup>15</sup>(0.02 mol scale) Synthesized according to general procedure

C. The product was purified by column chromatography using hexanes as eluent to give a light yellow liquid in 86% yield. <sup>1</sup>H NMR (400 MHz, CDCl<sub>3</sub>): δ 7.02 (m, 3H), 2.38 (s, 6H); <sup>13</sup>C NMR (100 MHz, CDCl<sub>3</sub>): δ 137.0, 132.2, 128.9, 125.7, 18.2.

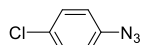

**1-Azido-4-chlorobenzene.**<sup>15</sup>(0.02 mol scale) Synthesized according to general procedure

C. The product was purified by column chromatography using pentane as eluent to give a light yellow liquid in 88% yield. <sup>1</sup>H NMR (400 MHz, CDCl<sub>3</sub>): δ 7.31 (app d, 2H, J = 8.6 Hz), 6.98 (app d, 2H, J = 8.6 Hz); <sup>13</sup>C NMR (100 MHz, CDCl<sub>3</sub>): δ 138.7, 130.2, 129.9, 120.3.

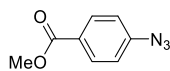

**Methyl 4-azidobenzoate.**<sup>17</sup>(0.02 mol scale) Synthesized according to general procedure

C. The product was purified by column chromatography using hexanes:EtOAc as eluent to give a pale solid in 62 % yield. <sup>1</sup>H NMR (400 MHz, CDCl<sub>3</sub>): δ 8.03 (app d, 2H, J = 8.6 Hz), 7.05 (app d, 2H, J = 8.6 Hz), 3.90 (s, 3 H); <sup>13</sup>C NMR (100 MHz, CDCl<sub>3</sub>): δ 166.3, 144.7, 131.4, 126.7, 118.9, 52.2.

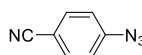

**4-Azidobenzonitrile.**<sup>18</sup>(0.02 mol scale) Synthesized according to general procedure C. The

product was purified by column chromatography using hexanes:EtOAc (9:1) as eluent to give a pale yellow solid in 80% yield. <sup>1</sup>H NMR (400 MHz, CDCl<sub>3</sub>): δ 7.02 (m, 3H), 2.38 (s, 6H); <sup>13</sup>C NMR (100 MHz, CDCl<sub>3</sub>): δ 137.0, 132.2, 128.9, 125.7, 18.2.

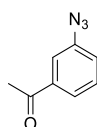

**3-Azidoacetophenone.**<sup>19</sup>(0.02 mol scale) Synthesized according to general procedure C. The

product was purified by column chromatography using hexanes:EtOAc 9:1 as eluent to give an orange liquid in 70 % yield. <sup>1</sup>H NMR (400 MHz, CDCl<sub>3</sub>): δ 7.70 (app d, 1H, J = 7.7 Hz), 7.60 (app t, 1H, J = 1.9 Hz), 7.44 (t, 1H, J = 7.7 Hz), 7.23 (app dd, 1H, J = 7.7, 1.9 Hz), 2.62 (s, 3H); <sup>13</sup>C NMR (100 MHz, CDCl<sub>3</sub>): δ 197.1, 140.9, 138.7, 130.0, 124.9, 123.5, 118.5, 26.7.

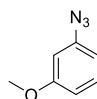

**3-Azidoacetophenone.**<sup>14</sup>(0.02 mol scale) Synthesized according to general procedure C.

Extracted with diethyl ether instead of EtOAc. The product was purified by column chromatography using pentane as eluent to give a light yellow oil in 80% yield. <sup>1</sup>H NMR (400 MHz, CDCl<sub>3</sub>): δ 7.26 (t, 1H, J = 8.2 Hz), 6.72 (dd, 1H, J = 8.2, 2.0 Hz), 6.65 (dd, 1H, J = 8.2, 2.0 Hz), 6.56 (t, 1H, J = 2.0 Hz), 3.81 (s, 3H); <sup>13</sup>C NMR (100 MHz, CDCl<sub>3</sub>): δ 160.8, 141.3, 130.4, 111.3, 110.7, 104.9, 55.4.

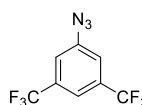

**1-Azido-3,5-bis(trifluoromethyl)benzene.**<sup>20</sup>(0.02 mol scale) Synthesized according to general procedure C. The product was purified by column chromatography using pentane

as eluent to give a pale yellow liquid in 65% yield.  $^1\text{H}$  NMR (400 MHz,  $\text{CDCl}_3$ ):  $\delta$  7.65 (s, 1H), 7.45 (s, 2H);  $^{13}\text{C}$  NMR (100 MHz,  $\text{CDCl}_3$ ):  $\delta$  142.4 (1C), 133.1 (2C, q,  $J = 34$  Hz), 122.8 (2 $\text{CF}_3$ , q,  $J = 271$  Hz), 119.1 (2C, m), 118.3 (C, m);  $^{19}\text{F}$  NMR (376 MHz,  $\text{CDCl}_3$ ):  $\delta$  -63.17 (m, 6F).

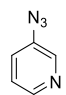

**3-Azidopyridine.**<sup>21</sup> (0.02 mol scale) Synthesized according to **general procedure C**. The product was purified by column chromatography using hexanes:EtOAc 1:4 as eluent to give an amber liquid in 69% yield.  $^1\text{H}$  NMR (400 MHz,  $\text{CDCl}_3$ ):  $\delta$  8.35(app d, 1H,  $J = 4.5$  Hz), 8.31(d, 1H,  $J = 2.1$  Hz), 7.26(dm, 1H,  $J = 8.1$  Hz), 7.22 (m, 1H);  $^{13}\text{C}$  NMR (100 MHz,  $\text{CDCl}_3$ ):  $\delta$  146.0, 141.3, 137.1, 125.9, 124.1.

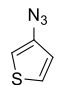

**3-Azidothiophene.**<sup>22</sup> Synthesized using a modified version of a reported procedure.<sup>23</sup> To a solution of 3-bromothiophene (0.03 mmol) in anhydrous ether (80 mL) at  $-70^\circ\text{C}$  under nitrogen, was added *n*-butyl lithium (24 mL, 1.6 M solution in hexane) while stirring. The mixture was stirred for 30 min at  $-70^\circ\text{C}$ , to which was added *p*-toluenesulfonyl azide (0.07 mol) dropwise. The reaction mixture was stirred for 3 h at  $-70^\circ\text{C}$ , after which the temperature was allowed to increase to  $-40^\circ\text{C}$  over 1 h. A solution of ethylenediaminetetraacetic acid disodium salt (11.4 g, 0.05 mol) in water (100 mL), was added, while maintaining the temperature below  $0^\circ\text{C}$ . After stirring for 15 min at  $0^\circ\text{C}$ , the reaction mixture was allowed to reach rt, and stirred for another 12 h. The mixture was extracted with ether and washed with water, dried over  $\text{MgSO}_4$ , filtered, and evaporated. The red-brown residue was purified by column chromatography using pentane as eluent to give an amber liquid in 22% yield.  $^1\text{H}$  NMR (400 MHz,  $\text{CDCl}_3$ ):  $\delta$  7.30 (dd, 1H,  $J = 3.2, 5.2$  Hz), 6.82 (dd, 1H,  $J = 5.2, 1.5$  Hz), 6.80 (dd, 1H,  $J = 3.2, 1.5$  Hz);  $^{13}\text{C}$  NMR (100 MHz,  $\text{CDCl}_3$ ):  $\delta$  137.7, 126.7, 120.6, 109.8.

## Synthesis of products

**General procedure A** (Table 1, Figure 1). In a microwave vial (2 mL) charged with azide (1.0 mmol) and aldehyde (1.1 mmol) in DMSO (2.0 mL), was added base (0.1 mmol) and the reaction mixture was stirred at elevated temperature under microwave irradiation for 0.5-2 h. The crude reaction mixture was added to aqueous  $\text{NH}_4\text{Cl}$  solution (20 mL) and the aqueous layer was extracted with EtOAc (3x30 mL). The combined organic layers were washed with water and then dried over  $\text{Na}_2\text{SO}_4$ , filtered and concentrated. The products were obtained by column chromatography (silica gel, hexanes/EtOAc).

**General procedure B** (Figure 1). In a flask (10 mL) charged with azide (1.0 mmol) and aldehyde (1.2 – 1.5 mmol) in DMSO (2.0 mL), was added base (0.1 mmol) and the reaction mixture was stirred at rt. When NMR analysis ( $\text{DMSO}-d_6$ ) indicated complete conversion, an aq. AcOH solution (2 mL, 1.5 M) was added dropwise and the reaction mixture was stirred for 1 h. The resulting solution was extracted with EtOAc (3 x 30 mL), and the combined organic layers were washed with 0.5 M aq. HCl (10 mL), dried over  $\text{Na}_2\text{SO}_4$ , filtered and concentrated. The products were obtained by column chromatography (silica gel, hexanes/EtOAc).

**General procedure C** (Table 2 and S1). In a vial (10 mL) charged with azide (1.0 mmol) in THF (1 mL) and *t*-BuOH (0.5 mL), *t*-BuOK (1.2 – 2.0 mmol) was added and the reaction mixture was stirred vigorously at room temperature. Afterwards, aldehyde (4 mmol) in THF (0.5 mL) was added dropwise within 0.5 - 1 minute. After the reaction time (1-5 minutes), the mixture was quickly quenched by 2 mL

aq. AcOH (1.5 M) and stirred for another 1 hours. The mixture was then extracted with ethyl acetate (3 x 30 mL). The combined organic layers were then dried over Na<sub>2</sub>SO<sub>4</sub>, filtered and concentrated. Amides were obtained by column chromatography (silica gel, hexanes/EtOAc).

**General procedure D** (Figure 2). In a flask (5 mL) charged with azide (1.0 mmol) and aldehyde (1.1 mmol) in DMSO (2.0 mL), was added base (0.1 mmol) and the reaction mixture was stirred at room temperature while the flask remained open. After complete conversion, as indicated by <sup>19</sup>F-NMR spectroscopy, the reaction mixture was added to an aq. NH<sub>4</sub>Cl solution (20 mL), and extracted with ethyl acetate (3 x 30 mL). The combined organic layers were washed with water and concentrated. The products were obtained by column chromatography (silica gel, hexanes/EtOAc).

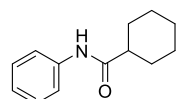

*N*-Phenylcyclohexanecarboxamide (**6a**).<sup>24</sup> White solid. *R*<sub>f</sub> = 0.28 (hexanes/EtOAc = 5:1). <sup>1</sup>H NMR (400 MHz, CDCl<sub>3</sub>): δ<sub>H</sub> 1.24 – 1.35 (m, 3H), 1.54 (quartet, 2H, CH, *J* = 12.3 Hz), 1.70 (m, 1H, CH), 1.83 (m, 2H), 1.96 (d, 2H, CH, *J* = 13.2 Hz), 2.23 (tt, 1H, CH, *J* = 11.6, 3.6 Hz), 7.09 (t, 1H, *J* = 7.5 Hz), 7.10 (br. s, 1H, NH), 7.31 (t, 2H, *J* = 7.5 Hz), 7.52 (d, 2H, *J* = 7.5 Hz); <sup>13</sup>C NMR (100 MHz, CDCl<sub>3</sub>): δ<sub>C</sub> 25.8 (3C), 29.7 (2C), 46.7, 119.8, 119.9, 124.2, 129.1, 138.2, 174.4.

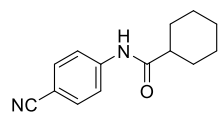

*N*-(4-Cyanophenyl)cyclohexanecarboxamide (**6b**). White powder. *R*<sub>f</sub> = 0.20 (hexanes/EtOAc = 4:1). <sup>1</sup>H NMR (400 MHz, CDCl<sub>3</sub>): δ<sub>H</sub> 1.21 – 1.39 (m, 3H), 1.52 (quartet, 2H, CH, *J* = 12.8 Hz), 1.72 (m, 1H, CH), 1.84 (m, 2H, CH<sub>2</sub>), 1.96 (d, 2H, CH, *J* = 13.0 Hz), 2.26 (tt, 1H, CH, *J* = 3.5, 11.8 Hz), 7.34 (br. s, 1H, NH), 7.60 (d, 1H, *J* = 8.6 Hz), 7.67 (d, 1H, *J* = 8.6 Hz); <sup>13</sup>C NMR (100 MHz, CDCl<sub>3</sub>): δ<sub>C</sub> 25.7 (3C), 29.7 (2C), 46.8, 107.1, 119.0, 119.6, 133.4, 142.3, 174.8. ESI-HRMS: Calcd. for C<sub>14</sub>H<sub>17</sub>N<sub>2</sub>O [M+H]<sup>+</sup>: 229.1335, found 229.1340. IR (ATR), see attached spectrum.

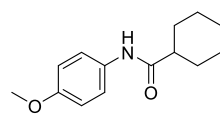

*N*-(4-Methoxyphenyl)cyclohexanecarboxamide (**6c**).<sup>35</sup> White solid. *R*<sub>f</sub> = 0.21 (hexanes/EtOAc = 4:1). <sup>1</sup>H NMR (400 MHz, CDCl<sub>3</sub>): δ<sub>H</sub> 1.23 – 1.33 (m, 3H), 1.53 (quartet, 2H, CH, *J* = 12.8 Hz), 1.72 (m, 1H, CH), 1.84 (m, 2H), 1.95 (d, 2H, CH, *J* = 13.2 Hz), 2.20 (tt, 1H, CH, *J* = 3.4, 12.0 Hz), 3.78 (s, 3H, OCH<sub>3</sub>), 6.85 (d, 2H, *J* = 8.2 Hz), 7.06 (br. s, 1H, NH), 7.42 (d, 2H, *J* = 8.2 Hz); <sup>13</sup>C NMR (100 MHz, CDCl<sub>3</sub>): δ<sub>C</sub> 25.9 (3C), 29.9 (2C), 46.6, 55.6, 114.3, 121.8, 131.3, 156.4, 174.2.

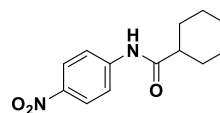

*N*-(4-Nitrophenyl)cyclohexanecarboxamide (**6d**).<sup>30</sup> Yellow powder. *R*<sub>f</sub> = 0.36 (hexanes/EtOAc = 3:1). <sup>1</sup>H NMR (400 MHz, CDCl<sub>3</sub>): δ<sub>H</sub> 1.31 (m, 3H), 1.54 (quartet, 2H, CH, *J* = 12.8 Hz), 1.71 (m, 1H, CH), 1.85 (m, 2H, CH<sub>2</sub>), 1.98 (d, 2H, CH, *J* = 13.2 Hz), 2.29 (tt, 1H, CH, *J* = 3.4, 12.0 Hz), 7.54 (br. s, 1H, NH), 7.72 (d, 1H, *J* = 9.0 Hz), 8.20 (d, 1H, *J* = 9.0 Hz); <sup>13</sup>C NMR (100 MHz, CDCl<sub>3</sub>): δ<sub>C</sub> 25.7 (3C), 29.7 (2C), 46.8, 119.1, 125.2, 143.5, 144.1, 174.9.

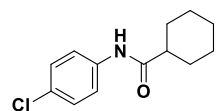

*N*-(4-Chlorophenyl)cyclohexanecarboxamide (**6e**).<sup>31</sup> White powder. *R*<sub>f</sub> = 0.43 (hexanes/EtOAc = 9:1). <sup>1</sup>H NMR (400 MHz, CDCl<sub>3</sub>): δ<sub>H</sub> 1.22 – 1.35 (m, 3H), 1.52



(quartet, 2H, CH, J = 12.8 Hz), 1.70 (m, 1H, CH), 1.83 (m, 2H, CH<sub>2</sub>), 1.94 (d, 2H, CH, J = 13.0 Hz), 2.22 (tt, 1H, CH, J = 3.5, 11.6 Hz), 7.26 (br. s, 1H, NH), 7.26 (d, 1H, J = 9.0 Hz), 7.47 (d, 1H, J = 9.0 Hz); <sup>13</sup>C NMR (100 MHz, CDCl<sub>3</sub>): δ 25.8 (3C), 29.8 (2C), 46.6, 121.2, 129.1, 129.2, 136.8, 174.5.

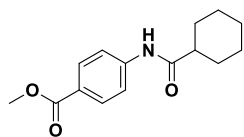

Methyl 4-(cyclohexanecarboxamido)benzoate(**6f**).<sup>32</sup> White powder. R<sub>f</sub> = 0.20 (hexanes/EtOAc= 4:1). <sup>1</sup>H NMR (400 MHz, CDCl<sub>3</sub>): δ<sub>H</sub> 1.22 – 1.33 (m, 3H), 1.54 (quartet, 2H, CH, J = 12.8 Hz), 1.71 (m, 1H, CH), 1.83 (m, 2H, CH<sub>2</sub>), 1.96 (d, 2H, CH, J = 13.0 Hz), 2.25 (tt, 1H, CH, J = 3.5, 11.6 Hz), 3.89 (s, 3H, OCH<sub>3</sub>), 7.38 (br. s, 1H, NH), 7.61 (d, 1H, J = 8.7 Hz), 7.99 (d, 1H, J = 8.7 Hz); <sup>13</sup>C NMR (100 MHz, CDCl<sub>3</sub>): δ 25.8 (3C), 29.7 (2C), 46.8, 52.1, 118.9, 125.6, 131.0, 142.4, 166.8, 174.7.

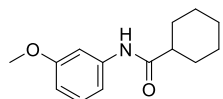

N-(3-Methoxyphenyl)cyclohexanecarboxamide(**6g**). White solid. R<sub>f</sub> = 0.47 (hexanes/EtOAc= 3:1). <sup>1</sup>H NMR (400 MHz, CDCl<sub>3</sub>): δ<sub>H</sub> 1.22 – 1.40 (m, 3H), 1.54 (app quartet, 2H, CH, J = 12.8 Hz), 1.71 (m, 1H, CH), 1.84 (m, 2H), 1.96 (app d, 2H, CH, J = 13.2 Hz), 2.22 (tt, 1H, CH, J = 3.4, 11.8 Hz), 3.80 (s, 3H, OCH<sub>3</sub>), 6.65 (app d, 1H, J = 8.3 Hz), 6.94 (app d, 1H, J = 7.8 Hz), 7.14 (br. s, 1H, NH), 7.19 (t, 1H, J = 8.1 Hz), 7.37 (s, 1H); <sup>13</sup>C NMR (100 MHz, CDCl<sub>3</sub>): δ 25.8 (3C), 29.8 (2C), 46.7, 55.4, 105.4, 110.2, 111.9, 129.7, 139.6, 160.2, 174.7; ESI-HRMS: Calcd. for C<sub>14</sub>H<sub>20</sub>NO<sub>2</sub> [M+H]<sup>+</sup>: 234.1494, found 234.1502. IR(ATR), see attached spectrum.

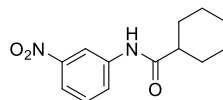

N-(3-Nitrophenyl)cyclohexanecarboxamide(**6h**).<sup>33</sup> Yellow powder. R<sub>f</sub> = 0.50 (hexanes/EtOAc= 4:1). <sup>1</sup>H NMR (400 MHz, CDCl<sub>3</sub>): δ<sub>H</sub> 1.21 – 1.40 (m, 3H), 1.55 (quartet, 2H, CH, J = 12.8 Hz), 1.72 (m, 1H, CH), 1.85 (dm, 2H, CH, J = 12.8 Hz), 1.97 (d, 2H, CH, J = 13.2 Hz), 2.29 (tt, 1H, CH, J = 3.4, 11.8 Hz), 7.47 (t, 1H, J = 8.1 Hz), 7.54 (br. s, 1H, NH), 7.93 (dd, 1H, J = 8.2, 1.5 Hz), 7.96 (dd, 1H, J = 8.2, 1.5 Hz), 8.38 (t, 1H, J = 2.0 Hz); <sup>13</sup>C NMR (100 MHz, CDCl<sub>3</sub>): δ 25.7 (3C), 29.7 (2C), 46.6, 114.6, 118.8, 125.6, 130.0, 139.4, 148.7, 174.9.

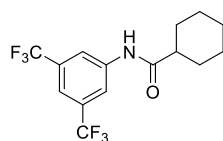

N-(3,5-Bis(trifluoromethyl)phenyl)cyclohexanecarboxamide(**6i**).<sup>34</sup> White solid. R<sub>f</sub> = 0.57 (hexanes/EtOAc= 4:1). <sup>1</sup>H NMR (400 MHz, CDCl<sub>3</sub>): δ<sub>H</sub> 1.21 – 1.40 (m, 3H), 1.55 (quartet, 2H, CH, J = 12.8 Hz), 1.72 (m, 1H, CH), 1.86 (m, 2H), 1.96 (d, 2H, CH, J = 13.2 Hz), 2.27 (tt, 1H, CH, J = 3.4, 11.8 Hz), 7.49 (br. s, 1H, NH), 7.58 (s, 1H), 8.05 (s, 1H); <sup>13</sup>C NMR (100 MHz, CDCl<sub>3</sub>): δ 25.7 (3C), 29.7 (2C), 46.6, 117.5 (m), 119.5 (m), 123.2 (quartet, 1C, J<sub>CF</sub> = 272 Hz, CF<sub>3</sub>), 132.5 (quartet, 1C, J<sub>CF</sub> = 33 Hz), 139.6, 174.9; <sup>19</sup>F NMR (376 MHz, CDCl<sub>3</sub>): δ -63.07 (m, 6F); ESI-HRMS: Calcd. for C<sub>15</sub>H<sub>16</sub>F<sub>6</sub>NO [M+H]<sup>+</sup>: 340.1136, found 340.1134. IR(ATR), see attached spectrum.

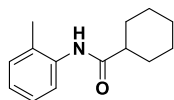

N-(o-Tolyl)cyclohexanecarboxamide(**6j**).<sup>27</sup> White powder. R<sub>f</sub> = 0.50 (hexanes/EtOAc= 3:1). <sup>1</sup>H NMR (400 MHz, CDCl<sub>3</sub>): δ<sub>H</sub> 1.22 – 1.34 (m, 3H), 1.55 (quartet, 2H, CH, J = 12.8 Hz), 1.70 (m, 1H, CH), 1.82 (m, 2H), 1.99 (d, 2H, CH, J = 13.2 Hz), 2.22 – 2.30 (m, 4H, CH & CH<sub>3</sub>), 6.95 (br. s, 1H, NH), 7.04 (t, 1H, J = 7.5 Hz), 7.14 – 7.20 (m, 2H), 7.82 (d, 1H, J = 7.9 Hz); <sup>13</sup>C NMR (100 MHz, CDCl<sub>3</sub>): δ 17.9, 25.9, 30.0, 46.6, 123.2, 125.1, 126.9, 128.9, 130.5, 135.9, 174.3.

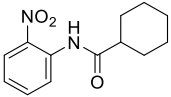 *N*-(2-Nitrophenyl)cyclohexanecarboxamide (**6k**).<sup>25</sup> Yellow powder.  $R_f = 0.42$  (hexanes/EtOAc= 4:1).  $^1\text{H NMR}$  (400 MHz,  $\text{CDCl}_3$ ):  $\delta_{\text{H}}$  1.25 – 1.42 (m, 3H), 1.55 (quartet, 2H, CH,  $J = 12.8$  Hz), 1.72 (m, 1H), 1.85 (dm, 2H, CH,  $J = 12.8$  Hz), 2.03 (d, 2H, CH,  $J = 13.2$  Hz), 2.36 (tt, 1H, CH,  $J = 3.4, 11.6$  Hz), 7.16 (t, 1H,  $J = 7.7$  Hz), 7.63 (t, 1H,  $J = 7.7$  Hz), 8.21 (dd, 1H,  $J = 8.4, 1.3$  Hz), 8.82 (d, 1H,  $J = 8.4$  Hz), 10.44 (br. s, 1H, NH);  $^{13}\text{C NMR}$  (100 MHz,  $\text{CDCl}_3$ ):  $\delta_{25.7, 25.8, 29.7, 47.3, 122.4, 123.1, 125.9, 135.4, 136.1, 136.4, 175.4$ .

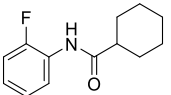 *N*-(2-Fluorophenyl)cyclohexanecarboxamide (**6l**).<sup>28</sup> White powder.  $R_f = 0.28$  (hexanes/EtOAc= 9:1).  $^1\text{H NMR}$  (400 MHz,  $\text{CDCl}_3$ ):  $\delta_{\text{H}}$  1.24 – 1.36 (m, 3H), 1.55 (quartet, 2H, CH,  $J = 12.8$  Hz), 1.72 (m, 1H, CH), 1.84 (dm, 2H, CH,  $J = 12.8$  Hz), 1.97 (d, 2H, CH,  $J = 13.2$  Hz), 2.28 (tt, 1H, CH,  $J = 3.5, 12.0$  Hz), 7.05 (m, 3H), 7.38 (br. s, 1H, NH), 8.35 (t, 1H,  $J = 9.5$  Hz);  $^{13}\text{C NMR}$  (100 MHz,  $\text{CDCl}_3$ ):  $\delta_{25.76, 25.79, 29.8, 46.7, 114.8}$  (d,  $J_{\text{CF}} = 19$  Hz), 121.8, 124.1 (d,  $J_{\text{CF}} = 8$  Hz), 124.7 (d,  $J_{\text{CF}} = 4$  Hz), 126.7 (d,  $J_{\text{CF}} = 10$  Hz), 152.4 (d,  $J_{\text{CF}} = 242$  Hz), 174.5.  $^{19}\text{F NMR}$  (376 MHz,  $\text{CDCl}_3$ ):  $\delta$ -131.96 (m).

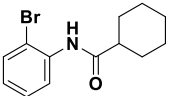 *N*-(2-Bromophenyl)cyclohexanecarboxamide (**6m**).<sup>26</sup> White powder.  $R_f = 0.35$  (hexanes/EtOAc= 12:1).  $^1\text{H NMR}$  (400 MHz,  $\text{CDCl}_3$ ):  $\delta_{\text{H}}$  1.22 – 1.36 (m, 3H), 1.55 (app quartet, 2H, CH,  $J = 12.8$  Hz), 1.72 (m, 1H, CH), 1.86 (app dm, 2H, CH,  $J = 12.8$  Hz), 2.03 (d, 2H, CH,  $J = 13.2$  Hz), 2.32 (tt, 1H, CH,  $J = 3.4, 12.0$  Hz), 6.96 (td, 1H,  $J = 1.5, 7.8$  Hz), 7.31 (t, 1H,  $J = 7.8$  Hz), 7.52 (dd, 1H,  $J = 8.1, 1.2$  Hz), 7.70 (br. s, 1H, NH), 8.38 (d, 1H,  $J = 8.2$  Hz);  $^{13}\text{C NMR}$  (100 MHz,  $\text{CDCl}_3$ ):  $\delta_{25.8, 25.9, 29.8, 46.8, 122.0, 125.1, 128.6, 132.3, 136.0, 174.4$ .

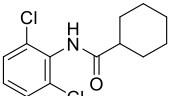 *N*-(2,6-Dichlorophenyl)cyclohexanecarboxamide (**6n**).<sup>29</sup> White powder.  $R_f = 0.16$  (hexanes/EtOAc= 9:1).  $^1\text{H NMR}$  (400 MHz,  $\text{CDCl}_3$ ):  $\delta_{\text{H}}$  1.22 – 1.36 (m, 3H), 1.55 (m, 2H), 1.72 (m, 1H, CH), 1.86 (dm, 2H, CH,  $J = 12.8$  Hz), 2.04 (d, 2H, CH,  $J = 13.2$  Hz), 2.34 (t, 1H, CH,  $J = 12.0$  Hz), 6.93 (br. s, 1H, NH), 7.16 (t, 1H,  $J = 8.0$  Hz), 7.36 (d, 2H,  $J = 8.0$  Hz);  $^{13}\text{C NMR}$  (100 MHz,  $\text{CDCl}_3$ ):  $\delta_{25.8, 25.9, 29.8, 45.7, 128.4, 128.5, 132.3, 133.8, 174.1$ .

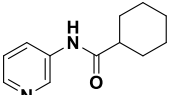 *N*-(Pyridin-3-yl)cyclohexanecarboxamide (**6p**).<sup>36</sup> White solid. Yield > 95%.  $R_f = 0.17$  (hexanes/EtOAc= 1:1).  $^1\text{H NMR}$  (400 MHz,  $\text{CDCl}_3$ ):  $\delta_{\text{H}}$  1.21 – 1.39 (m, 3H), 1.55 (quartet, 2H, CH,  $J = 12.8$  Hz), 1.71 (m, 1H, CH), 1.83 (m, 2H), 1.95 (d, 2H, CH,  $J = 13.2$  Hz), 2.29 (tt, 1H, CH,  $J = 11.6, 3.3$  Hz), 7.27 (dd, 1H,  $J = 8.0, 1.4$  Hz), 7.74 (br. s, 1H, NH), 8.24 (dd, 1H, Ar-H,  $J = 8.0, 1.4$  Hz), 8.32 (s, 1H), 8.57 (s, 1H);  $^{13}\text{C NMR}$  (100 MHz,  $\text{CDCl}_3$ ):  $\delta_{25.7}$  (3C), 29.7 (2C), 46.5, 123.9, 127.5, 135.4, 140.9, 144.8, 175.2.

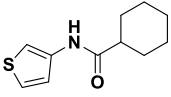 *N*-(Thiophen-3-yl)cyclohexanecarboxamide (**6q**). White solid.  $R_f = 0.33$  (hexanes/EtOAc= 4:1).  $^1\text{H NMR}$  (400 MHz,  $\text{CDCl}_3$ ):  $\delta_{\text{H}}$  1.22 – 1.39 (m, 3H), 1.52 (quartet, 2H, CH,  $J = 12.8$  Hz), 1.71 (m, 1H, CH), 1.83 (m, 2H), 1.94 (d, 2H, CH,  $J = 13.2$  Hz), 2.22 (tt, 1H, CH,  $J = 3.4, 11.8$  Hz), 7.49 (br. s, 1H, NH), 6.99 (dd, 1H, Ar-H,  $J = 5.2, 1.2$  Hz), 7.21 (dd, 1H, Ar-H,  $J = 5.2, 3.2$  Hz), 7.58 (br. s, 1H, NH), 7.59 (m, 1H, NH);  $^{13}\text{C NMR}$  (100 MHz,  $\text{CDCl}_3$ ):  $\delta_{25.8}$  (3C), 29.8 (2C), 46.1, 110.1, 121.1, 124.6, 135.8, 173.7; ESI-HRMS: Calcd. for  $\text{C}_{11}\text{H}_{16}\text{NOS}$   $[\text{M}+\text{H}]^+$ : 210.0953, found 210.0955. IR(ATR), see attached spectrum.

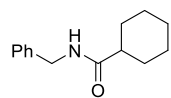 *N*-Benzylcyclohexanecarboxamide (**6s**).<sup>37</sup> White powder.  $R_f = 0.2$  (hexanes/EtOAc= 4:1).  $^1\text{H NMR}$  (400 MHz,  $\text{CDCl}_3$ ):  $\delta_{\text{H}}$  1.18 – 1.30 (m, 3H), 1.47 (m, 2H), 1.67 (m, 1H, *CH*), 1.78 (dm, 2H, *CH*,  $J = 12.8$  Hz), 1.87 (d, 2H, *CH*,  $J = 13.2$  Hz), 2.11 (tt, 1H, *CH*,  $J = 3.6$ , 12.0 Hz), 5.85 (br. s, 1H, *NH*), 7.30 (m, 5H);  $^{13}\text{C NMR}$  (100 MHz,  $\text{CDCl}_3$ ):  $\delta$  25.9, 29.8, 43.5, 45.7, 127.5, 127.8, 128.8, 138.7, 176.1.

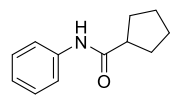 *N*-Phenylcyclopentanecarboxamide (**6t**).<sup>40</sup> White powder.  $R_f = 0.17$  (hexanes/EtOAc= 9:1).  $^1\text{H NMR}$  (400 MHz,  $\text{CDCl}_3$ ):  $\delta_{\text{H}}$  1.61 (m, 2H), 1.79 (m, 2H), 1.92 (m, 4H), 2.68 (quintet, 1H, *CH*,  $J = 8.3$  Hz), 7.09 (t, 1H,  $J = 7.5$  Hz), 7.16 (br. s, 1H, *NH*), 7.31 (t, 2H,  $J = 7.5$  Hz), 7.52 (d, 2H,  $J = 7.5$  Hz);  $^{13}\text{C NMR}$  (100 MHz,  $\text{CDCl}_3$ ):  $\delta$  26.2, 30.7, 47.1, 119.8, 124.2, 129.1, 138.3, 174.7.

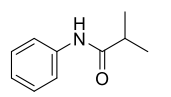 *N*-Phenylisobutyramide (**6v**).<sup>38</sup> White powder.  $R_f = 0.33$  (hexanes/EtOAc= 3:1).  $^1\text{H NMR}$  (400 MHz,  $\text{CDCl}_3$ ):  $\delta_{\text{H}}$  1.25 (d, 6H,  $\text{CH}_3$ ,  $J = 7.4$  Hz), 2.51 (m, 1H, *CH*), 7.09 (t, 1H,  $J = 7.9$  Hz), 7.23 (br. s, 1H, *NH*), 7.31 (t, 2H,  $J = 7.9$  Hz), 7.53 (d, 2H,  $J = 7.9$  Hz);  $^{13}\text{C NMR}$  (100 MHz,  $\text{CDCl}_3$ ):  $\delta$  19.8, 36.9, 119.9, 124.3, 129.1, 138.2, 175.4.

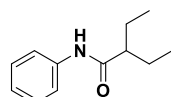 2-Ethyl-*N*-phenylbutanamide (**6w**).<sup>39</sup> White powder.  $R_f = 0.26$  (hexanes/EtOAc= 20:3).  $^1\text{H NMR}$  (400 MHz,  $\text{CDCl}_3$ ):  $\delta_{\text{H}}$  0.96 (t, 6H,  $\text{CH}_3$ ,  $J = 7.4$  Hz), 1.57 (m, 2H,  $\text{CH}_2$ ), 1.72 (m, 2H,  $\text{CH}_2$ ), 2.03 (septet, 1H, *CH*,  $J = 4.9$  Hz), 7.10 (t, 1H,  $J = 7.8$  Hz), 7.15 (br. s, 1H, *NH*), 7.32 (t, 2H,  $J = 7.8$  Hz), 7.55 (d, 2H,  $J = 8.1$  Hz);  $^{13}\text{C NMR}$  (100 MHz,  $\text{CDCl}_3$ ):  $\delta$  12.3, 26.0, 52.7, 120.0, 124.4, 129.1, 138.1, 174.3.

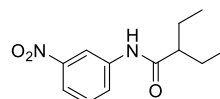 2-Ethyl-*N*-(3-nitrophenyl)butanamide (**6x**).<sup>25a</sup> White powder.  $R_f = 0.42$  (hexanes/EtOAc= 3:1).  $^1\text{H NMR}$  (400 MHz,  $\text{CDCl}_3$ ):  $\delta_{\text{H}}$  0.97 (t, 6H,  $J = 7.4$  Hz), 1.60 (m, 2H,  $\text{CH}_2$ ), 1.73 (m, 2H,  $\text{CH}_2$ ), 2.09 (septet, 1H, *CH*,  $J = 4.9$  Hz), 7.41 (br. s, 1H, *NH*), 7.49 (t, 1H,  $J = 8.0$  Hz), 7.96 (dd, 1H,  $J = 8.2$ , 1.6 Hz), 7.99 (d, 1H,  $J = 8.0$  Hz), 8.40 (t, 1H,  $J = 1.6$  Hz);  $^{13}\text{C NMR}$  (100 MHz,  $\text{CDCl}_3$ ):  $\delta$  12.2, 25.9, 52.6, 114.7, 119.0, 125.7, 130.0, 139.1, 148.7, 174.8; ESI-HRMS: Calcd. for  $\text{C}_{12}\text{H}_{17}\text{N}_2\text{O}_3$   $[\text{M}+\text{H}]^+$ : 237.1239, found 237.1247. IR(ATR), see attached spectrum.

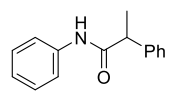 *N*,2-Diphenylpropanamide (**6y**).<sup>41</sup> White solid.  $R_f = 0.55$  (hexanes/EtOAc= 3:1).  $^1\text{H NMR}$  (400 MHz,  $\text{CDCl}_3$ ):  $\delta_{\text{H}}$  1.60 (d, 3H,  $\text{CH}_3$ ,  $J = 7.1$  Hz), 3.23 (quartet, 1H, *CH*), 7.07 (t, 1H,  $J = 7.5$  Hz), 7.12 (br. s, 1H, *NH*), 7.25 – 7.28 (m, 2H), 7.30 – 7.33 (m, 1H), 7.36 – 7.42 (m, 6H);  $^{13}\text{C NMR}$  (100 MHz,  $\text{CDCl}_3$ ):  $\delta$  18.7, 48.3, 119.8, 124.4, 127.7, 128.4, 129.0, 129.3, 138.0, 141.1, 172.4.

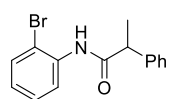 *N*-(2-Bromophenyl)-2-phenylpropanamide (**6z**).<sup>42</sup> pale yellow solid.  $R_f = 0.25$  (hexanes/EtOAc= 4:1).  $^1\text{H NMR}$  (400 MHz,  $\text{CDCl}_3$ ):  $\delta_{\text{H}}$  1.65 (d, 3H,  $\text{CH}_3$ ,  $J = 7.2$  Hz), 3.80 (quartet, 1H, *Ar-CH*,  $J = 7.2$  Hz), 6.92 (app t, 1H, *Ar-H*,  $J = 7.8$  Hz), 7.28 (t, 1H,  $J = 7.8$  Hz), 7.33 (m, 1H), 7.38-7.44 (m, 5H, *Ar-H*), 7.61 (br, 1H, *N-H*), 8.36 (d, 1H,  $J = 8.1$  Hz);  $^{13}\text{C NMR}$  (100 MHz,  $\text{CDCl}_3$ ):  $\delta$  18.1, 48.6, 113.3, 121.5, 125.1, 128.0, 128.1, 128.4, 129.4, 132.3, 135.9, 140.4, 172.6.

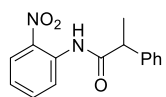

*N*-(2-Nitrophenyl)-2-phenylpropanamide(**6aa**). Yellowish solid.  $R_f = 0.30$  (hexanes/EtOAc = 6:1).  $^1\text{H NMR}$  (400 MHz,  $\text{CDCl}_3$ ):  $\delta_{\text{H}}$  1.65 (d, 3H,  $\text{CH}_3$ ,  $J = 7.1$  Hz), 3.82 (quartet, 1H, Ar- $\text{CH}$ ,  $J = 7.1$  Hz), 7.13 (t, 1H, Ar- $\text{H}$ ,  $J = 7.8$  Hz), 7.30-7.46 (m, 5H, Ar- $\text{H}$ ), 7.61 (t, 1H, Ar- $\text{H}$ ,  $J = 7.8$  Hz), 8.15 (dd, 1H,  $J = 8.6, 1.4$  Hz), 8.80 (d, 1H,  $J = 8.6$  Hz), 10.31 (s, 1H, N- $\text{H}$ );  $^{13}\text{C NMR}$  (100 MHz,  $\text{CDCl}_3$ ):  $\delta$  18.1, 49.3, 122.1, 123.2, 125.8, 127.9, 128.1, 129.4, 135.2, 136.0, 136.3, 140.0, 173.6. ESI-HRMS: Calcd. for  $\text{C}_{15}\text{H}_{15}\text{N}_2\text{O}_3$   $[\text{M}+\text{H}]^+$ : 271.1077, found 271.1076. IR(ATR), see attached spectrum.

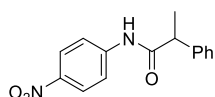

*N*-(4-Nitrophenyl)-2-phenylpropanamide(**6bb**).<sup>30</sup>Yellowish solid.  $R_f = 0.31$  (hexanes/EtOAc = 3:1).  $^1\text{H NMR}$  (400 MHz,  $\text{CDCl}_3$ ):  $\delta_{\text{H}}$  1.60 (d, 3H,  $\text{CH}_3$ ,  $J = 7.1$  Hz), 3.76 (quartet, 1H, Ar- $\text{CH}$ ,  $J = 7.1$  Hz), 7.33-7.40 (m, 5H, Ar- $\text{H}$ ), 7.49 (s, 1H, N- $\text{H}$ ), 7.61 (d, 1H, Ar- $\text{H}$ ,  $J = 9.1$  Hz), 8.14 (d, 1H,  $J = 9.1$  Hz);  $^{13}\text{C NMR}$  (100 MHz,  $\text{CDCl}_3$ ):  $\delta$  18.6, 48.4, 119.1, 125.1, 127.8, 128.1, 129.5, 140.3, 143.6, 143.8, 172.9.

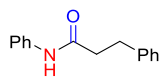

*N*,3-Diphenylpropanamide(**6cc**).<sup>43</sup> Colorless solid.  $R_f = 0.23$  (hexanes/EtOAc = 6:1).  $^1\text{H NMR}$  (400 MHz,  $\text{CDCl}_3$ ):  $\delta_{\text{H}}$  2.66 (t, 2H,  $J = 7.7$  Hz), 3.06 (t, 2H,  $J = 7.7$  Hz), 7.08 (br. s, 1H,  $\text{NH}$ ), 7.10 (t, 1H,  $J = 7.2$  Hz), 7.24 (m, 3H), 7.30 (m, 4H), 7.43 (d, 2H,  $J = 7.2$  Hz);  $^{13}\text{C NMR}$  (100 MHz,  $\text{CDCl}_3$ ):  $\delta$  31.7, 39.7, 120.0, 124.5, 126.6, 128.6, 128.8, 129.1, 137.9, 140.8, 170.5.

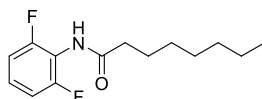

*N*-(2,6-Difluorophenyl)octanamide(**6dd**). Colorless solid.  $R_f = 0.32$  (hexanes/EtOAc = 4:1).  $^1\text{H NMR}$  (400 MHz,  $\text{CDCl}_3$ ):  $\delta_{\text{H}}$  0.88 (t, 3H,  $J = 6.3$  Hz), 1.31 (m, 8H), 1.73 (m, 2H), 2.4 (m, 2H), 6.80 (br. s, 1H,  $\text{NH}$ ), 6.94 (t, 2H,  $J = 8.1$  Hz), 7.19 (m, 1H);  $^{13}\text{C NMR}$  (100 MHz,  $\text{CDCl}_3$ ):  $\delta$  14.2, 22.7, 25.7, 29.1, 29.2, 31.7, 31.8, 36.6, 111.7, 111.9, 127.7, 158.1(d, 1C,  $J_{\text{CF}} = 250$  Hz), 171.7;  $^{19}\text{F NMR}$  (376 MHz,  $\text{CDCl}_3$ ):  $\delta$  -118.00 (m); ESI-HRMS: Calcd. for  $\text{C}_{14}\text{H}_{20}\text{NOF}_2$   $[\text{M}+\text{H}]^+$ : 256.1507, found 256.1509. IR(ATR), see attached spectrum.

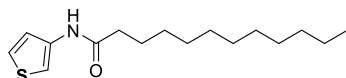

*N*-(Thiophen-3-yl)dodecanamide(**6ee**). White solid.  $R_f = 0.47$  (hexanes/EtOAc = 4:1).  $^1\text{H NMR}$  (400 MHz,  $\text{CDCl}_3$ ):  $\delta_{\text{H}}$  0.88 (t, 3H,  $J = 6.3$  Hz), 1.25 (m, 16H), 1.70 (quintet, 2H,  $J = 7.2$  Hz), 2.33 (t, 2H,  $J = 7.2$  Hz), 6.98 (dd, 1H, Ar- $\text{H}$ ,  $J = 5.1, 1.1$  Hz), 7.22 (dd, 1H, Ar- $\text{H}$ ,  $J = 5.2, 3.2$  Hz), 7.42 (br. s, 1H,  $\text{NH}$ ), 7.57 (d, 1H,  $J = 2.2$  Hz);  $^{13}\text{C NMR}$  (100 MHz,  $\text{CDCl}_3$ ):  $\delta$  14.3, 22.8, 25.8, 29.4, 29.5(2C), 29.6, 29.8(2C), 30.1, 37.4, 110.2, 131.0, 124.6, 135.7, 170.7; ESI-HRMS: Calcd. for  $\text{C}_{16}\text{H}_{28}\text{NOS}$   $[\text{M}+\text{H}]^+$ : 282.1866, found 282.1866. IR(ATR), see attached spectrum.

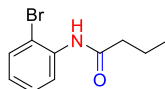

*N*-(2-Bromophenyl)butyramide(**6ff**).<sup>44</sup>Colorless solid.  $R_f = 0.51$  (hexanes/EtOAc = 4:1).  $^1\text{H NMR}$  (400 MHz,  $\text{CDCl}_3$ ):  $\delta_{\text{H}}$  1.04 (t, 2H,  $J = 7.3$  Hz), 1.79 (sextet, 2H,  $J = 7.3$  Hz), 2.41 (t, 2H,  $J = 7.3$  Hz), 6.97 (t, 1H,  $J = 7.5$  Hz), 7.31 (t, 1H,  $J = 7.5$  Hz), 7.53 (d, 1H,  $J = 7.5$  Hz), 7.62 (br. s, 1H,  $\text{NH}$ ), 8.36 (d, 1H,  $J = 7.5$  Hz);  $^{13}\text{C NMR}$  (100 MHz,  $\text{CDCl}_3$ ):  $\delta$  13.9, 19.2, 40.1, 113.3, 122.0, 125.2, 128.6, 132.3, 135.9, 171.3.

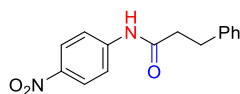

*N*-(4-Nitrophenyl)-3-phenylpropanamide(**6gg**).<sup>45</sup> Yellowish solid.  $R_f = 0.19$  (hexanes/EtOAc= 6:1).  $^1\text{H NMR}$  (400 MHz,  $\text{CDCl}_3$ ):  $\delta_{\text{H}}$  2.73 (t, 2H,  $J = 7.7$  Hz), 3.06 (t, 2H,  $J = 7.7$  Hz), 7.23 (tm, 3H,  $J = 7.7$  Hz), 7.30 (t, 1H,  $J = 7.7$  Hz), 7.61 (br. s, 1H, *NH*), 7.62 (d, 2H,  $J = 9.3$  Hz), 8.16 (d, 2H,  $J = 9.3$  Hz);  $^{13}\text{C NMR}$  (100 MHz,  $\text{CDCl}_3$ ):  $\delta$  31.4, 39.6, 119.2, 125.2, 126.7, 128.4, 128.8, 140.2, 143.5, 143.8, 171.1.

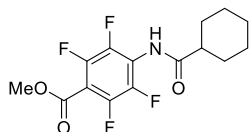

Methyl 4-(cyclohexanecarboxamido)-2,3,5,6-tetrafluorobenzoate(**6hh**). White solid.  $R_f = 0.47$  (hexanes/EtOAc= 3:1).  $^1\text{H NMR}$  (400 MHz,  $\text{CDCl}_3$ ):  $\delta_{\text{H}}$  1.21 – 1.39 (m, 3H), 1.56 (quartet, 2H, *CH*,  $J = 12.8$  Hz), 1.72 (m, 1H, *CH*), 1.89 (d, 2H, *CH*,  $J = 12.8$  Hz), 1.99 (d, 2H, *CH*,  $J = 12.8$  Hz), 2.40 (tt, 1H, *CH*,  $J = 3.5, 11.5$  Hz), 3.97 (s, 3H,  $\text{OCH}_3$ ), 7.09 (br, 1H, *NH*);  $^{13}\text{C NMR}$  (100 MHz,  $\text{CDCl}_3$ ):  $\delta$  25.6, 25.7, 29.7, 45.4, 53.4, 109.9 (m), 119.7 (m), 142.1 (dm, 2C,  $J_{\text{CF}} = 250$  Hz), 145.1 (dm, 2C,  $J_{\text{CF}} = 258$  Hz), 160.2, 174.0;  $^{19}\text{F NMR}$  (376 MHz,  $\text{CDCl}_3$ ):  $\delta$  -139.60 (m, 2F), -144.32 (m, 2F). ESI-HRMS: Calcd. for  $\text{C}_{15}\text{H}_{16}\text{F}_4\text{NO}_3$   $[\text{M}+\text{H}]^+$ : 334.1066, found 334.1068. IR(ATR), see attached spectrum.

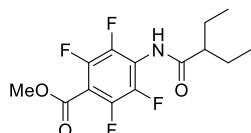

Methyl 4-(2-ethylbutanamido)-2,3,5,6-tetrafluorobenzoate(**6ii**). White powder.  $R_f = 0.2$  (hexanes/EtOAc= 6:1).  $^1\text{H NMR}$  (400 MHz,  $\text{CDCl}_3$ ):  $\delta_{\text{H}}$  0.96 (t, 6H,  $J = 7.4$  Hz), 1.60 (m, 2H,  $\text{CH}_2$ ), 1.72 (m, 2H,  $\text{CH}_2$ ), 2.23 (septet, 1H, *CH*,  $J = 5.0$  Hz), 3.97 (s, 3H,  $\text{OMe}$ ), 7.17 (br. s, 1H, *NH*);  $^{13}\text{C NMR}$  (100 MHz,  $\text{CDCl}_3$ ):  $\delta$  11.9, 25.9, 51.4, 53.4, 110.0 (m), 119.5 (m), 142.0 (dm, 2C,  $J_{\text{CF}} = 250$  Hz), 145.0 (dm, 2C,  $J_{\text{CF}} = 250$  Hz), 160.4, 174.2;  $^{19}\text{F NMR}$  (376 MHz,  $\text{CDCl}_3$ ):  $\delta$  -139.63 (m, 2F), -144.00 (m, 2F); ESI-HRMS: Calcd. for  $\text{C}_{14}\text{H}_{16}\text{F}_4\text{NO}_3$   $[\text{M}+\text{H}]^+$ : 322.1066, found 322.1071. IR (ATR), see attached spectrum.

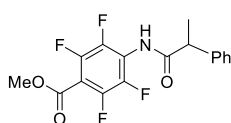

Methyl 2,3,5,6-tetrafluoro-4-(2-phenylpropanamido)benzoate(**6jj**). White solid.  $R_f = 0.33$  (3:1 hexanes/EtOAc).  $^1\text{H NMR}$  (400 MHz,  $\text{CDCl}_3$ ):  $\delta_{\text{H}}$  1.59 (d, 3H,  $\text{CH}_3$ ,  $J = 7.2$  Hz), 3.84 (quartet, 1H, *Ar-CH*,  $J = 7.2$  Hz), 3.95 (s, 3H,  $\text{OCH}_3$ ), 7.03 (br, 1H, *NH*), 7.31 – 7.41 (m, 5H, *Ar-H*);  $^{13}\text{C NMR}$  (100 MHz,  $\text{CDCl}_3$ ):  $\delta$  18.6, 47.3, 53.4, 109.9 (m), 119.5 (m), 127.8, 128.0, 129.5, 140.2, 142.0 (dm, 2C,  $J_{\text{CF}} = 243$  Hz), 144.7 (dm, 2C,  $J_{\text{CF}} = 256$  Hz), 159.8, 169.4;  $^{19}\text{F NMR}$  (376 MHz,  $\text{CDCl}_3$ ):  $\delta$  -139.54 (m, 2F), -144.20 (m, 2F); ESI-HRMS: Calcd. for  $\text{C}_{17}\text{H}_{14}\text{F}_4\text{NO}_3$   $[\text{M}+\text{H}]^+$ : 356.0901, found 356.0910. IR(ATR), see attached spectrum.

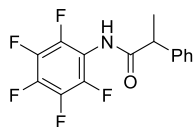

*N*-(Perfluorophenyl)-2-phenylpropanamide(**6kk**).<sup>46</sup> White solid.  $R_f = 0.30$  (10:1 hexanes/EtOAc).  $^1\text{H NMR}$  (400 MHz,  $\text{CDCl}_3$ ):  $\delta_{\text{H}}$  1.60 (d, 3H,  $\text{CH}_3$ ,  $J = 7.1$  Hz), 3.82 (quartet, 1H, *Ar-CH*,  $J = 7.1$  Hz), 6.77 (br, 1H, *NH*), 7.27–7.42 (m, 5H, *Ar-H*);  $^{13}\text{C NMR}$  (100 MHz,  $\text{CDCl}_3$ ):  $\delta$  18.6, 47.2, 112.0 (m), 127.8, 128.0, 129.4, 140.2, 137.8 (dm, 2C,  $J_{\text{CF}} = 247$  Hz), 140.3 (dm, 1C,  $J_{\text{CF}} = 232$  Hz), 140.4, 143.1 (dm, 2C,  $J_{\text{CF}} = 252$  Hz), 173.0;  $^{19}\text{F NMR}$  (376 MHz,  $\text{CDCl}_3$ ):  $\delta$  -145.00 (m, 2F), -156.54 (m, 1F), -156.54 (m, 2F). IR(ATR), see attached spectrum.

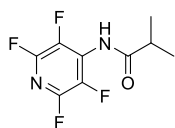

*N*-(Perfluoropyridin-4-yl)isobutyramide (**6ll**). White solid.  $R_f = 0.25$  (hexanes/EtOAc= 5:1).  $^1\text{H NMR}$  (400 MHz,  $\text{CDCl}_3$ ):  $\delta_{\text{H}}$  1.30 (d, 6H,  $\text{CH}_3$ ,  $J = 6.9$  Hz), 2.70 (septet, 1H, *CH*,  $J = 6.9$  Hz), 7.19 (s, 1H, *NH*);  $^{13}\text{C NMR}$  (100 MHz, DMSO):  $\delta$  19.2, 34.0, 130.0 (m), 136.7 (dm, 2C,  $J_{\text{CF}} = 258$  Hz), 142.9 (dm, 2C,  $J_{\text{CF}} = 240$  Hz), 174.7;  $^{19}\text{F NMR}$  (376 MHz, DMSO):

$\delta$ -92.67 (m, 2F), -145.58 (m, 2F).ESI-HRMS: Calcd. for  $C_9H_9F_4N_2O$   $[M+H]^+$ : 237.0651, found 237.0648. IR(ATR), see attached spectrum.

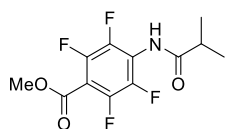

Methyl 2,3,5,6-tetrafluoro-4-isobutyramidobenzoate (**6mm**). White solid.  $R_f$  = 0.24 (hexanes/EtOAc= 3:1).  $^1H$  NMR (400 MHz,  $CDCl_3$ ):  $\delta_H$  1.28 (d, 6H,  $CH_3$ ,  $J$  = 6.9 Hz), 2.67 (septet, 1H,  $CH$ ,  $J$  = 6.9 Hz), 3.95 (s, 3H,  $OCH_3$ ), 7.03 (br, 1H,  $NH$ ), 7.31 - 7.41 (m, 5H, Ar- $H$ );  $^{13}C$  NMR (100 MHz,  $CDCl_3$ ):  $\delta$  19.5, 35.9, 53.4, 110.0 (m), 119.7 (m), 142.1 (dm, 2C,  $J_{CF}$  = 252 Hz), 145.1 (dm, 2C,  $J_{CF}$  = 256 Hz), 159.8, 169.4;  $^{19}F$  NMR (376 MHz,  $CDCl_3$ ):  $\delta$ -139.60 (m, 2F), -144.42 (m, 2F);ESI-HRMS: Calcd. for  $C_{12}H_{12}F_4NO_3$   $[M+H]^+$ : 294.0753, found 294.0744. IR(ATR), see attached spectrum.

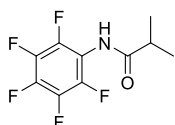

*N*-(Perfluorophenyl)isobutyramide (**6nn**). White solid.  $R_f$  = 0.44 (hexanes/EtOAc= 3:1).  $^1H$  NMR (400 MHz,  $CDCl_3$ ):  $\delta_H$  1.29 (d, 6H,  $CH_3$ ,  $J$  = 6.9 Hz), 2.65 (septet, 1H,  $CH$ ,  $J$  = 6.9 Hz), 6.77 (br, 1H,  $NH$ );  $^{13}C$  NMR (100 MHz,  $CDCl_3$ ):  $\delta$  19.6, 35.7, 112.1 (m), 137.8 (dm, 2C,  $J_{CF}$  = 248 Hz), 140.3 (dm, 1C,  $J_{CF}$  = 241 Hz), 143.2 (dm, 2C,  $J_{CF}$  = 250 Hz), 175.7;  $^{19}F$  NMR (376 MHz,  $CDCl_3$ ):  $\delta$ -145.21 (m, 2F), -156.63 (m, 1F), -162.46 (m, 2F). ESI-HRMS: Calcd. for  $C_{15}H_{16}NO$   $[M+H]^+$ : 226.1232, found 226.1236. IR(ATR), see attached spectrum.

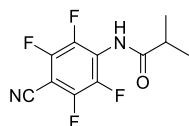

*N*-(4-Cyano-2,3,5,6-tetrafluorophenyl)isobutyramide (**6oo**). White solid.  $R_f$  = 0.26 (hexanes/EtOAc= 3:1).  $^1H$  NMR (400 MHz,  $CDCl_3$ ):  $\delta_H$  1.28 (d, 6H,  $CH_3$ ,  $J$  = 6.9 Hz), 2.69 (septet, 1H,  $CH$ ,  $J$  = 6.9 Hz), 7.43 (br, 1H,  $NH$ );  $^{13}C$  NMR (100 MHz,  $CDCl_3$ ):  $\delta$  19.4, 35.9, 91.2 (m, CN), 107.5 (m), 123.1 (m), 141.8 (dm, 2C,  $J_{CF}$  = 254 Hz), 147.5 (dm, 2C,  $J_{CF}$  = 261 Hz), 175.0;  $^{19}F$  NMR (376 MHz,  $CDCl_3$ ):  $\delta$ -132.78 (m, 2F), -141.80 (m, 2F);ESI-HRMS: Calcd. for  $C_{11}H_9F_4N_2O$   $[M+H]^+$ : 261.0651, found 261.0652. IR (ATR), see attached spectrum.

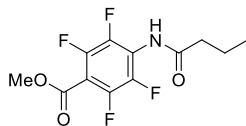

Methyl 4-butyramido-2,3,5,6-tetrafluorobenzoate (**6pp**). White solid.  $R_f$  = 0.23 (hexanes/EtOAc= 9:1).  $^1H$  NMR (400 MHz,  $CDCl_3$ ):  $\delta_H$  1.02 (t, 3H,  $CH_3$ ,  $J$  = 7.4 Hz), 1.77 (sextet, 2H,  $CH_2CH_3$ ,  $J$  = 7.4 Hz), 2.44 (t, 3H,  $CH_3$ ,  $J$  = 7.4 Hz), 3.97 (s, 3H,  $OCH_3$ ), 7.22 (br, 1H,  $NH$ );  $^{13}C$  NMR (100 MHz,  $CDCl_3$ ):  $\delta$  13.6, 19.0, 38.3, 53.4, 110.1 (m), 119.5 (m), 142.1 (dm, 2C,  $J_{CF}$  = 250 Hz), 145.1 (dm, 2C,  $J_{CF}$  = 256 Hz), 160.2, 171.1;  $^{19}F$  NMR (376 MHz,  $CDCl_3$ ):  $\delta$ -139.52 (m, 2F), -144.15 (m, 2F).ESI-HRMS: Calcd. for  $C_{12}H_{12}F_4NO_3$   $[M+H]^+$ : 294.0753, found 294.0745. IR (ATR), see attached spectrum.

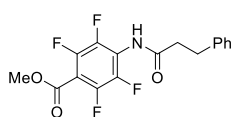

Methyl 2,3,5,6-tetrafluoro-4-(3-phenylpropanamido)benzoate (**6qq**). White solid.  $R_f$  = 0.29 (hexanes/EtOAc = 3:1).  $^1H$  NMR (400 MHz,  $CDCl_3$ ):  $\delta_H$  2.76 (t, 2H,  $CH_2$ ,  $J$  = 7.5 Hz), 3.03 (t, 2H, Ar- $CH_2$ ,  $J$  = 7.5 Hz), 3.96 (s, 3H,  $OCH_3$ ), 7.49 (br, 1H,  $NH$ ), 7.19-7.26 (m, 3H, Ar- $H$ ), 7.27- 7.31 (m, 2H, Ar- $H$ );  $^{13}C$  NMR (100 MHz,  $CDCl_3$ ):  $\delta$  31.3, 38.0, 53.5, 109.9 (m), 119.3 (m), 126.7, 128.4, 128.8, 140.0, 142.0 (dm, 2C,  $J_{CF}$  = 251 Hz), 145.0 (dm, 2C,  $J_{CF}$  = 257 Hz), 160.2, 170.6;  $^{19}F$  NMR (376 MHz,  $CDCl_3$ ):  $\delta$ -139.46 (m, 2F), -143.80 (m, 2F);ESI-HRMS: Calcd. for  $C_{17}H_{14}F_4NO_3$   $[M+H]^+$ : 356.0910, found 356.0913. IR (ATR), see attached spectrum.

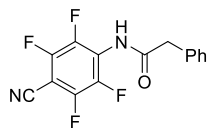

*N*-(4-Cyano-2,3,5,6-tetrafluorophenyl)-2-phenylacetamide(**6rr**). White solid.  $R_f = 0.23$  (3:1 hexanes/EtOAc).  $^1\text{H NMR}$  (400 MHz,  $\text{CDCl}_3$ ):  $\delta_{\text{H}}$  3.80 (s, 2H, Ar- $\text{CH}_2$ ), 7.26-7.35 (m, 5H, Ar- $H$ ), 10.81 (s, 1H, NH);  $^{13}\text{C NMR}$  (100 MHz,  $\text{CDCl}_3$ ):  $\delta$  41.8, 90.2 (CN), 108.2 (m), 123.5 (m), 126.8, 128.4, 129.1, 134.9, 141.4 (dm, 2C,  $J_{\text{CF}} = 250$  Hz), 145.0 (dm, 2C,  $J_{\text{CF}} = 258$  Hz), 169.0;  $^{19}\text{F NMR}$  (376 MHz,  $\text{CDCl}_3$ ):  $\delta$  -130.25 (m, 2F), -137.63 (m, 2F); ESI-HRMS: Calcd. for  $\text{C}_{15}\text{H}_9\text{F}_4\text{N}_2\text{O}$   $[\text{M}+\text{H}]^+$ : 309.0651, found 309.0652. IR (ATR), see attached spectrum.

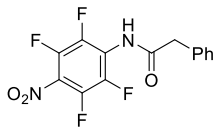

2-Phenyl-*N*-(2,3,5,6-tetrafluoro-4-nitrophenyl)acetamide(**6ss**). White powder.  $R_f = 0.36$  (3:1 hexanes/EtOAc).  $^1\text{H NMR}$  (400 MHz, DMSO):  $\delta_{\text{H}}$  3.80 (s, 1H, Ar- $\text{CH}_2$ ), 10.8 (br, 1H, NH), 7.27-7.35 (m, 5H, Ar- $H$ );  $^{13}\text{C NMR}$  (100 MHz, DMSO):  $\delta$  41.7, 111.3 (m), 122.0 (m), 126.8, 128.4, 129.1, 134.9, 141.1 (dm, 2C,  $J_{\text{CF}} = 257$  Hz), 141.7 (dm, 2C,  $J_{\text{CF}} = 253$  Hz), 169.0;  $^{19}\text{F NMR}$  (376 MHz, DMSO):  $\delta$  -142.67 (m, 2F), -147.08 (m, 2F). ESI-HRMS: Calcd. for  $\text{C}_{14}\text{H}_9\text{F}_4\text{N}_2\text{O}_3$   $[\text{M}+\text{H}]^+$ : 329.0549, found 329.0549. IR (ATR), see attached spectrum.

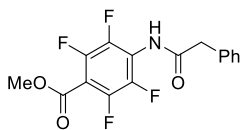

Methyl 2,3,5,6-tetrafluoro-4-(2-phenylacetamido)benzoate(**6tt**). White solid.  $R_f = 0.30$  (7:2 hexanes/EtOAc).  $^1\text{H NMR}$  (400 MHz,  $\text{CDCl}_3$ ):  $\delta_{\text{H}}$  3.82 (s, 2H, Ar- $\text{CH}_2$ ), 3.96 (s, 3H,  $\text{OCH}_3$ ), 7.10 (br, 1H, NH), 7.34 (m, 3H, Ar- $H$ ), 7.40 (m, 2H, Ar- $H$ );  $^{13}\text{C NMR}$  (100 MHz,  $\text{CDCl}_3$  & DMSO- $d_6$ ):  $\delta$  42.6, 53.0, 109.0 (m), 120.2 (m), 126.8, 128.1, 128.4, 128.9, 134.4, 142.1 (dm, 2C,  $J_{\text{CF}} = 240$  Hz), 145.1 (dm, 2C,  $J_{\text{CF}} = 255$  Hz), 160.1, 172.3;  $^{19}\text{F NMR}$  (376 MHz,  $\text{CDCl}_3$ ):  $\delta$  -139.37 (m, 2F), -143.99 (m, 2F); ESI-HRMS: Calcd. for  $\text{C}_{16}\text{H}_{12}\text{F}_4\text{NO}_3$   $[\text{M}+\text{H}]^+$ : 342.0748, found 342.0743. IR (ATR), see attached spectrum.

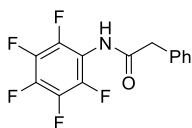

*N*-(Perfluorophenyl)-2-phenylacetamide(**6uu**).<sup>47</sup> White solid.  $R_f = 0.42$  (3:1 hexanes/EtOAc).  $^1\text{H NMR}$  (400 MHz, DMSO):  $\delta_{\text{H}}$  3.82 (s, 1H, Ar- $\text{CH}_2$ ), 10.3 (br, 1H, NH), 7.26-7.34 (m, 5H, Ar- $H$ );  $^{13}\text{C NMR}$  (100 MHz, DMSO):  $\delta$  41.7, 112.9 (m), 126.0 (m), 126.7, 128.4, 129.0, 135.2, 137.3 (dm, 2C,  $J_{\text{CF}} = 248$  Hz), 139.0 (dm, 1C,  $J_{\text{CF}} = 243$  Hz), 142.6 (dm, 2C,  $J_{\text{CF}} = 246$  Hz), 173.0;  $^{19}\text{F NMR}$  (376 MHz,  $\text{CDCl}_3$ ):  $\delta$  -145.40 (m, 2F), -158.19 (m, 1F), -163.55 (m, 2F). IR (ATR), see attached spectrum.

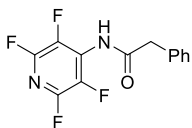

*N*-(Perfluoropyridin-4-yl)-2-phenylacetamide(**6vv**). White solid.  $R_f = 0.24$  (5:1 hexanes/EtOAc).  $^1\text{H NMR}$  (400 MHz, DMSO):  $\delta_{\text{H}}$  3.82 (s, 2H, Ar- $\text{CH}$ ), 7.26-7.35 (m, 5H, Ar- $H$ ), 10.99 (s, 1H, NH);  $^{13}\text{C NMR}$  (100 MHz, DMSO):  $\delta$  41.8, 126.8, 128.4, 129.1, 129.6 (m), 134.8, 136.6 (dm, 2C,  $J_{\text{CF}} = 257$  Hz), 142.9 (dm, 2C,  $J_{\text{CF}} = 240$  Hz), 168.7;  $^{19}\text{F NMR}$  (376 MHz, DMSO):  $\delta$  -95.25 (m, 2F), -145.17 (m, 2F); ESI-HRMS: Calcd. for  $\text{C}_{13}\text{H}_9\text{F}_4\text{N}_2\text{O}$   $[\text{M}+\text{H}]^+$ : 285.0651, found 285.0646. IR (ATR), see attached spectrum.

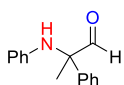

2-Phenyl-2-(phenylamino)propanal(**7**). Gray solid.  $R_f = 0.68$  (hexanes/EtOAc = 3:1).  $^1\text{H NMR}$  (400 MHz,  $\text{CDCl}_3$ ):  $\delta$  1.85 (s, 3H), 5.22 (br. s, 1H, NH), 6.44 (d, 2H, J), 6.44 (d, 2H, J = 8.0 Hz), 6.67 (t, 1H, J = 7.3 Hz), 7.06 (t, 2H, J = 8.0 Hz), 7.36 (t, 1H, J = 7.3 Hz), 7.42 (t, 2H, J = 8.0 Hz), 7.50 (d, 2H, J = 7.3 Hz), 9.30 (s, 1H);  $^{13}\text{C NMR}$  (100 MHz,  $\text{CDCl}_3$ ):  $\delta$  19.7, 66.4, 115.3, 117.8, 127.4, 128.3, 129.1, 129.4, 137.8, 144.4, 196.8; ESI-HRMS: Calcd. for  $\text{C}_{15}\text{H}_{16}\text{NO}$   $[\text{M}+\text{H}]^+$ : 226.1226, found 226.1230. IR (ATR), see attached spectrum.

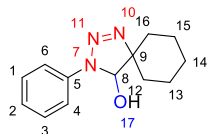

3-Phenyl-1,2,3-triazaspiro[4.5]dec-1-en-4-ol (**5a**). Triazoline **6a** decomposed during SiO<sub>2</sub>-gel column chromatography separation and was characterized from the crude product. <sup>1</sup>H NMR (400 MHz, DMSO): δ<sub>H</sub> 1.19 – 1.88 (m, 10H), 5.26 (s, 1H, C<sub>(8)</sub>H), 4.10 – 6.50 (br. s, 1H, OH), 6.97 (t, 1H, C<sub>(2)</sub>H, J = 7.5 Hz), 7.29 (t, 2H, C<sub>(1,3)</sub>H, J = 7.5 Hz), 7.43 (d, 2H, C<sub>(4,6)</sub>H, J = 8 Hz); <sup>13</sup>C NMR (100 MHz, DMSO): δ<sub>C</sub> 22.7, 23.4, 25.5, 27.8, 32.4, 82.7 (C<sub>(9)</sub>), 83.1(C<sub>(8)</sub>), 115.5, 122.2, 129.5, 140.8.

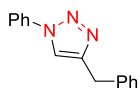

4-Benzyl-1-phenyl-1*H*-1,2,3-triazole(**8**).<sup>48</sup> White solid. R<sub>f</sub> = 0.25 (6:1 hexanes/EtOAc). <sup>1</sup>H NMR (400 MHz, CDCl<sub>3</sub>): δ 7.68 (m, 2H), 7.60 (s, 1H), 7.50 (m, 2H), 7.42 (m, 1H), 7.33 (m, 4H), 7.26 (m, 1H), 4.18 (s, 2H); <sup>13</sup>C NMR (100 MHz, CDCl<sub>3</sub>): δ 32.5, 119.8, 120.6, 126.8, 128.7, 128.9, 129.0, 129.8, 137.3, 139.0, 148.7.

## References

- (1) L'Abbe, G., *Chem. Rev.* **1969**, *69*, 345.
- (2) Zanirato, P., *Arkivoc* **2009**, 97.
- (3) L'Abbe, G.; Mathys, G., *J. Org. Chem.* **1974**, *39*, 1778.
- (4) Xie, S.; Lopez, S. A.; Ramstrom, O.; Yan, M.; Houk, K. N., *J. Am. Chem. Soc.* **2015**, *137*, 2958.
- (5) Keana, J. F. W.; Cai, S. X., *J. Org. Chem.* **1990**, *55*, 3640.
- (6) Jin, L. M.; Xu, X.; Lu, H.; Cui, X.; Wojtas, L.; Zhang, X. P., *Angew. Chem. Int. Ed.* **2013**, *52*, 5309.
- (7) Chapyshev, S. V., *Chem. Heterocycl. Compd.* **2001**, *37*.
- (8) Berger, O.; Kaniti, A.; van Ba, C.; Vial, H.; Ward, S.; Biagini, G.; Bray, P.; O'Neill, P., *ChemMedChem* **2011**, *6*, 2094.
- (9) Alonso, F.; Moglie, Y.; Radivoy, G.; Yus, M., *Eur. J. Org. Chem.* **2010**, *2010*, 1875.
- (10) Serwinski, P.; Esat, B.; Lahti, P.; Liao, Y.; Walton, R.; Lan, J., *J. Org. Chem.* **2004**, *69*, 5247.
- (11) Ueno, M.; Hori, C.; Suzawa, K.; Ebisawa, M.; Kondo, Y., *Eur. J. Org. Chem.* **2005**, *2005*, 1965.
- (12) Kwok, S. W.; Fotsing, J. R.; Fraser, R. J.; Rodionov, V. O.; Fokin, V. V., *Org. Lett.* **2010**, *12*, 4217.
- (13) Jin, L. M.; Xu, X.; Lu, H.; Cui, X.; Wojtas, L.; Zhang, X. P., *Angew. Chem. Int. Ed.* **2013**, *52*, 5309.
- (14) Hu, M.; Li, J.; Yao, S. Q., *Org. Lett.* **2008**, *10*, 5529.
- (15) Kitamura, M.; Kato, S.; Yano, M.; Tashiro, N.; Shiratake, Y.; Sando, M.; Okauchi, T., *Org. Biomol. Chem.* **2014**, *12*, 4397.
- (16) Morawietz, J.; Sander, W.; Traubel, M., *J. Org. Chem.* **1995**, *60*, 6368.
- (17) Chitre, K. P.; Guillén, E.; Yoon, A. S.; Galoppini, E., *Eur. J. Inorg. Chem.* **2012**, *2012*, 5461.
- (18) Nicolaidis, A.; Enyo, T.; Miura, D.; Tomioka, H., *J. Am. Chem. Soc.* **2001**, *123*, 2628.
- (19) Smith, C. D.; Greaney, M. F., *Org. Lett.* **2013**, *15*, 4826.
- (20) Laitar, D. S.; Mathison, C. J.; Davis, W. M.; Sadighi, J. P., *Inorg. Chem.* **2003**, *42*, 7354.
- (21) Tran, A. T.; Cergol, K. M.; Britton, W. J.; Imran Bokhari, S. A.; Ibrahim, M.; Lapthorn, A. J.; Payne, R. J., *MedChemComm* **2010**, *1*, 271.
- (22) Potratz, S.; Mishra, A.; Bauerle, P., *Beilstein. J. Org. Chem.* **2012**, *8*, 683.
- (23) Yarovenko, V. N.; Smirnova, N. G.; Bulgakova, V. N.; Zavarzin, I. V.; Krayushkin, M. M., *RUSS. J. ORG. CHEM.* **2003**, *39*, 1161.
- (24) Liu, H.; Yan, N.; Dyson, P. J., *Chem. Commun.* **2014**, *50*, 7848.



- (25) (a) Herbst, R. M.; Roberts, C. W.; Givens, H. T. F.; Harvill, E. K., *J. Org. Chem.* **1952**,*17*, 262. (b) Suzuki, Y. U., Jpn. Kokai Tokkyo Koho (**2011**), JP 2011128469 A 20110630.
- (26) Park, Y.-T.; Kim, M.-S.; Kwak, Y.-W.; Lee, J.-K.; Yoh, S.-D.; Kim, W.-S., *J. Photosci.* **2000**,*7*, 135.
- (27) La Regina, G.; Bai, R.; Rensen, W. M.; Di Cesare, E.; Coluccia, A.; Piscitelli, F.; Famiglini, V.; Reggio, A.; Nalli, M.; Pelliccia, S.; Da Pozzo, E.; Costa, B.; Granata, I.; Porta, A.; Maresca, B.; Soriani, A.; Iannitto, M. L.; Santoni, A.; Li, J.; Miranda Cona, M.; Chen, F.; Ni, Y.; Brancale, A.; Dondio, G.; Vultaggio, S.; Varasi, M.; Mercurio, C.; Martini, C.; Hamel, E.; Lavia, P.; Novellino, E.; Silvestri, R., *J. med. chem.***2013**,*56*, 123.
- (28) Beyer, A.; Buendia, J.; Bolm, C., *Org. Lett.* **2012**,*14*, 3948.
- (29) Nakatsuji, H.; Morimoto, M.; Misaki, T.; Tanabe, Y., *Tetrahedron* **2007**,*63*, 12071.
- (30) Carbone, G.; Burnley, J.; Moses, J. E., *Chem. Commun.* **2013**,*49*, 2759.
- (31) (a) Hara, T.; Wada, N.; Iwamura, H., *J. Agric. Food Chem.* **1992**,*40*, 1692. (b) Li, W.; Wu, X. F., *J. Org. Chem.* **2014**,*79*, 10410.
- (32) Coppo, F. T.; Maskell, E. S. L.; Redshaw, S., WO 2009071519 A1,**2009**.
- (33) (a) Mohmeyer, N.; Schmidt, H. W., *Chemistry* **2007**,*13*, 4499. (b) Flaherty, D. P.; Simpson, D. S.; Miller, M.; Maki, B. E.; Zou, B. Y.; Shi, J.; Wu, M.; McManus, O. B.; Aube, J.; Li, M.; Golden, J. E., *Bioorg. Med. Chem. Lett.***2014**,*24*, 3968.
- (34) (a) Takahashi, N. A., Osamu, Eur. Pat. Appl. (**1998**), EP 878741 A2 19981118. (b) Ono, H. T., Noriaki; Ando, Osamu; Takeuchi, Masako, Jpn. Kokai Tokkyo Koho (1997), JP 09160301 A 19970620.
- (35) Fors, B. P.; Krattiger, P.; Strieter, E.; Buchwald, S. L., *Org. Lett.* **2008**,*10*, 3505.
- (36) Fors, B. P.; Dooleweerd, K.; Zeng, Q.; Buchwald, S. L., *Tetrahedron* **2009**,*65*, 6576.
- (37) Morimoto, H.; Fujiwara, R.; Shimizu, Y.; Morisaki, K.; Ohshima, T., *Org. Lett.* **2014**,*16*, 2018.
- (38) Xiang, S. K.; Zhang, D. X.; Hu, H.; Shi, J. L.; Liao, L. G.; Feng, C.; Wang, B. Q.; Zhao, K. Q.; Hu, P.; Yang, H.; Yu, W. H., *Adv. Synth. Catal.***2013**,*355*, 1495.
- (39) (a) Baigrie, L. M.; Lenoir, D.; Seikaly, H. R.; Tidwell, T. T., *J. Org. Chem.* **1985**,*50*, 2105. (B) Cooke, M. P.; Pollock, C. M., *J. Org. Chem.* **1993**,*58*, 7474.
- (40) Ye, W.; Mo, J.; Zhao, T.; Xu, B., *Chem. Commun.* **2009**, 3246.
- (41) Dunetz, J. R.; Xiang, Y.; Baldwin, A.; Ringling, J., *Org. Lett.* **2011**,*13*, 5048.
- (42) Jia, Y. X.; Katayev, D.; Bernardinelli, G.; Seidel, T. M.; Kundig, E. P., *Chem. Eur. J.* **2010**,*16*, 6300.
- (43) Bures, J.; Martin, M.; Urpi, F.; Vilarrasa, J., *J. Org. Chem.* **2009**,*74*, 2203.
- (44) Muñoz, J. d. M.; Alcázar, J.; de la Hoz, A.; Díaz-Ortiz, Á.; Alonso de Diego, S.-A., *Green Chem.* **2012**,*14*, 1335.
- (45) Upadhayaya, R. S.; Kulkarni, G. M.; Vasireddy, N. R.; Vandavasi, J. K.; Dixit, S. S.; Sharma, V.; Chattopadhyaya, J., *Bioorg. Med. Chem.* **2009**,*17*, 4681.
- (46) Li, J.; Subramaniam, K.; Smith, D.; Qiao, J. X.; Li, J. J.; Qian-Cutrone, J.; Kadow, J. F.; Vite, G. D.; Chen, B. C., *Org. Lett.* **2012**,*14*, 214.
- (47) Chiang, Y.; Grant, A. S.; Guo, H. X.; Kresge, A. J.; Paine, S. W., *J. Org. Chem.* **1997**,*62*, 5363.
- (48) Macdonald, J. E.; Kelly, J. A.; Veinot, J. G., *Langmuir* **2007**,*23*, 9543.

# Characterization Spectra

CNMR L095

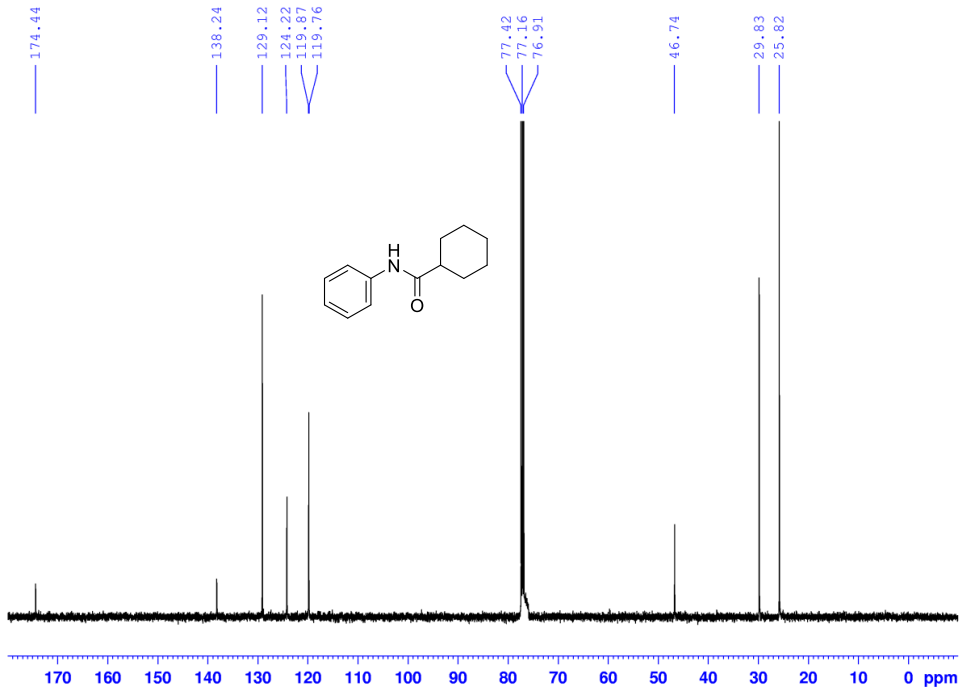

HNMR L095

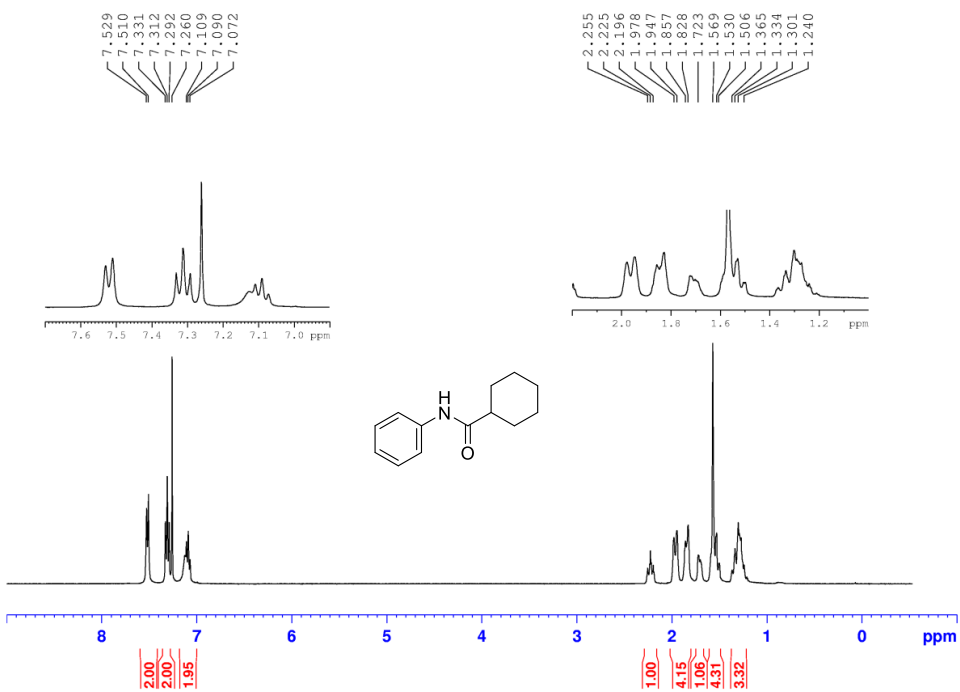

C13 NMR M002

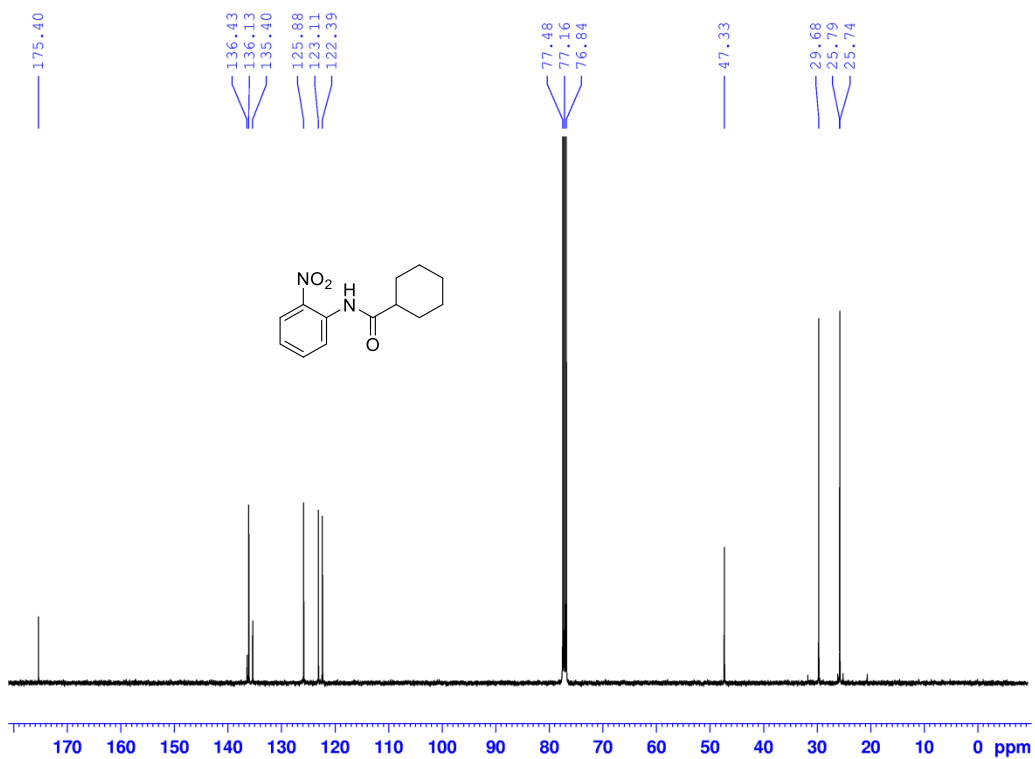

HNMR M002

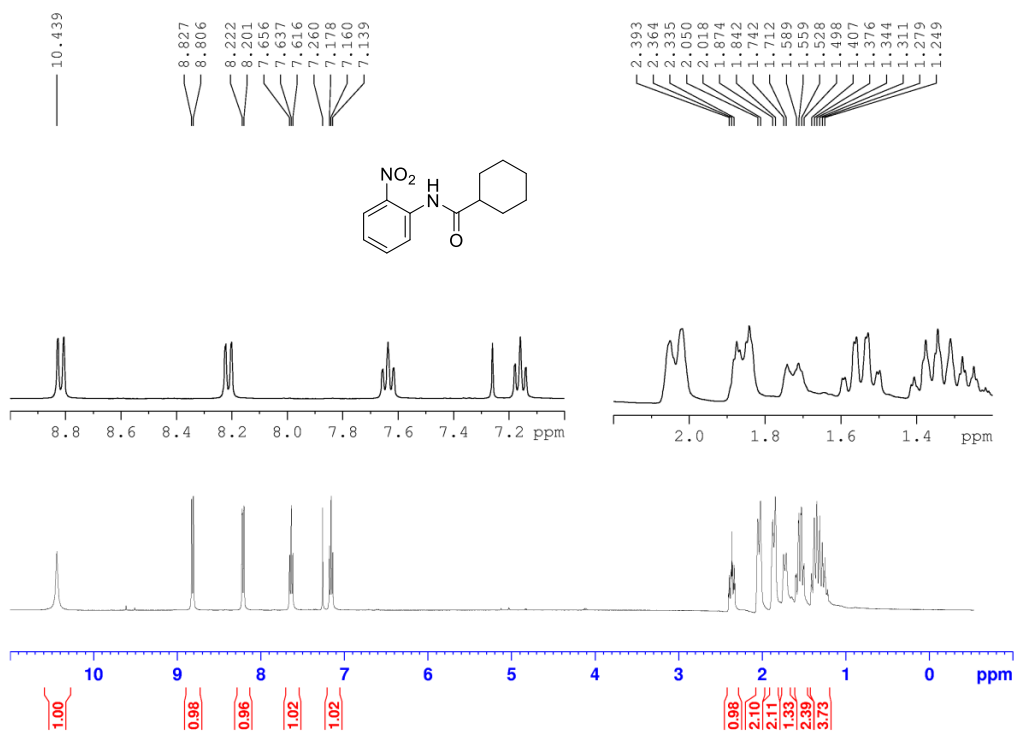

CNMR L092

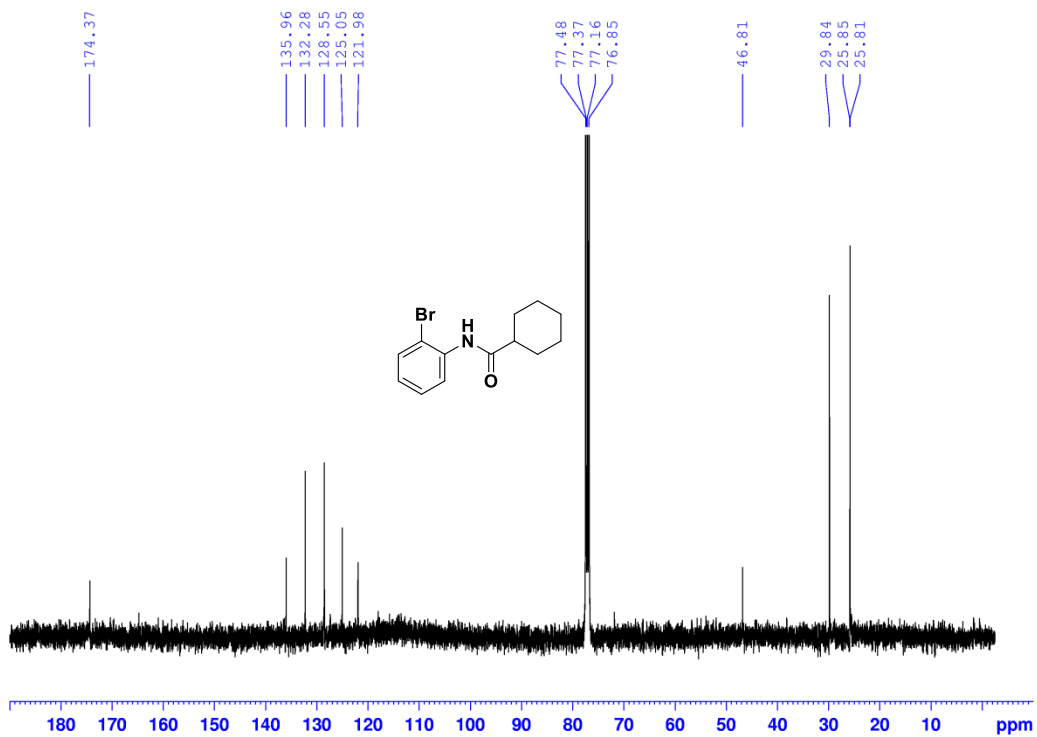

HNMR L092

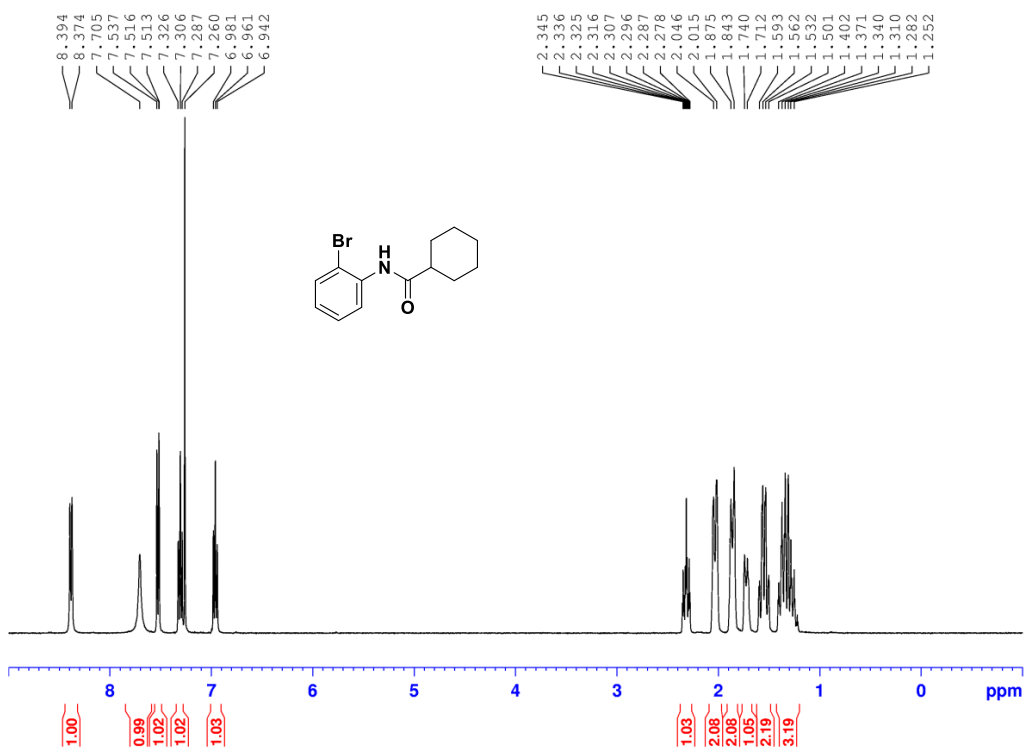

C13 M005

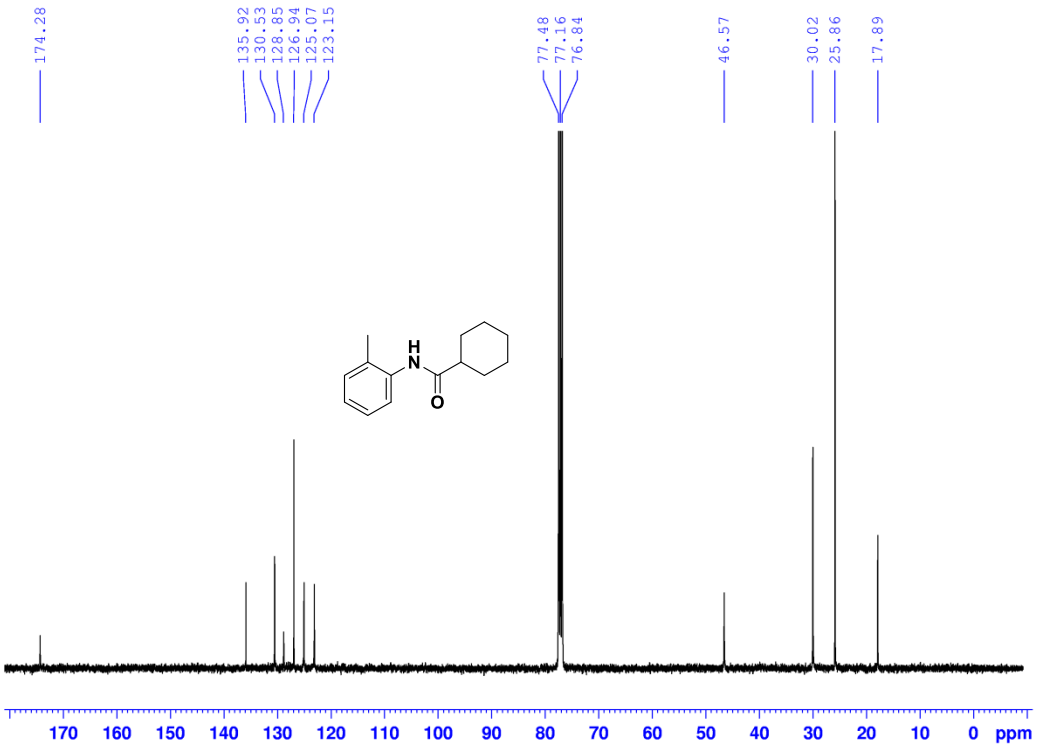

HNMR M005

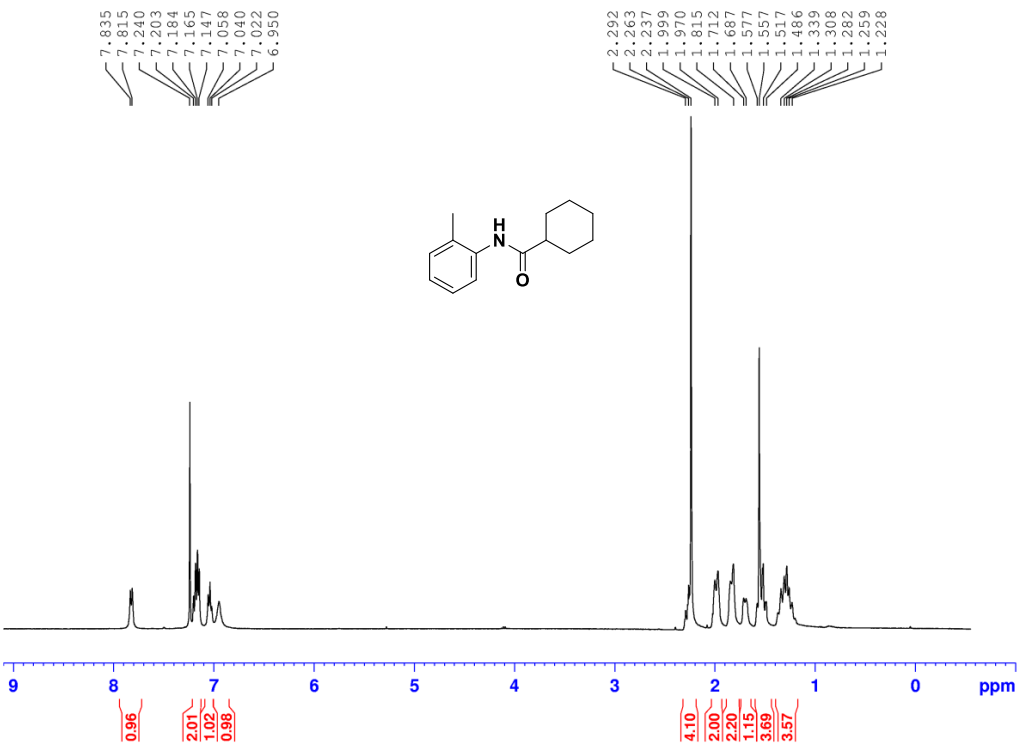

CNMR L101

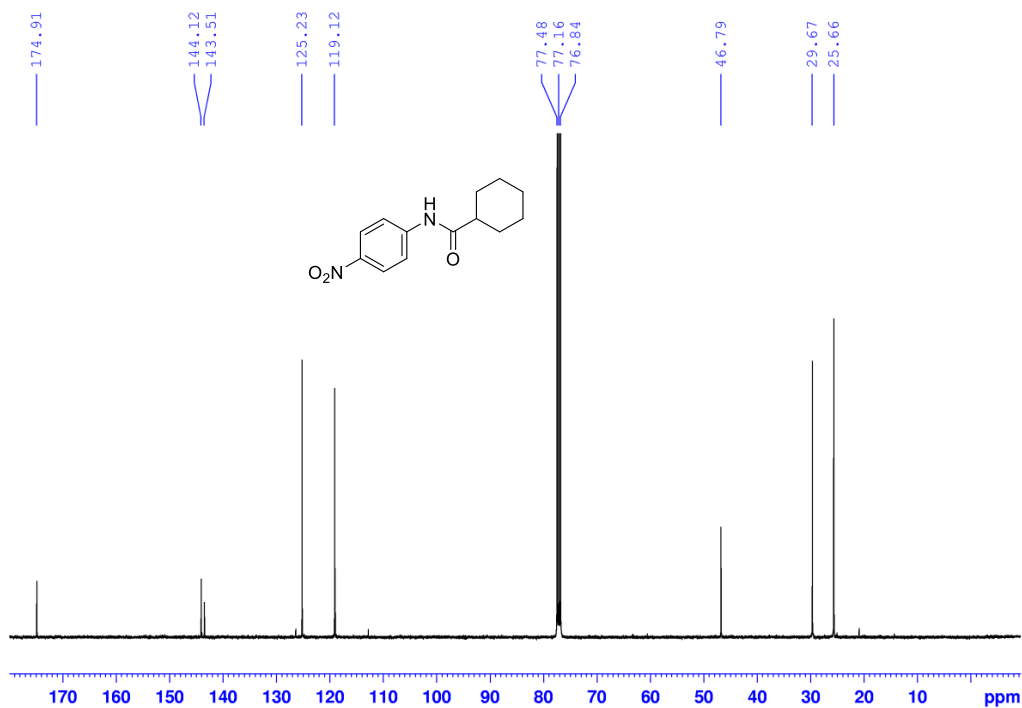

HNMR L101

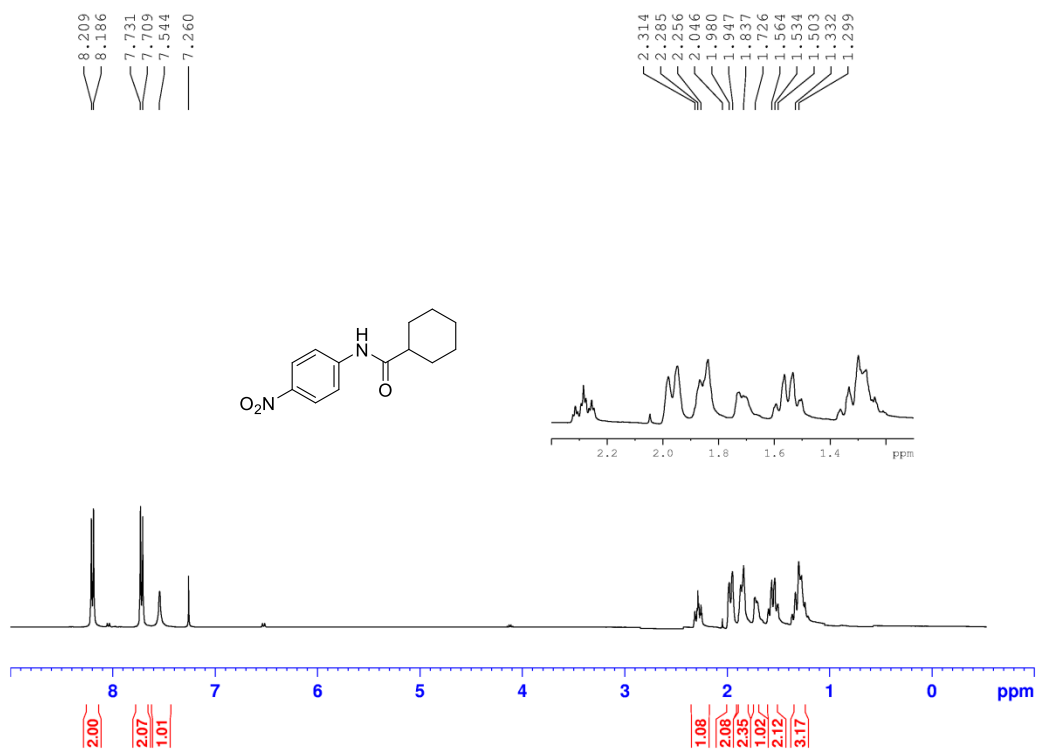

C13NMR M004

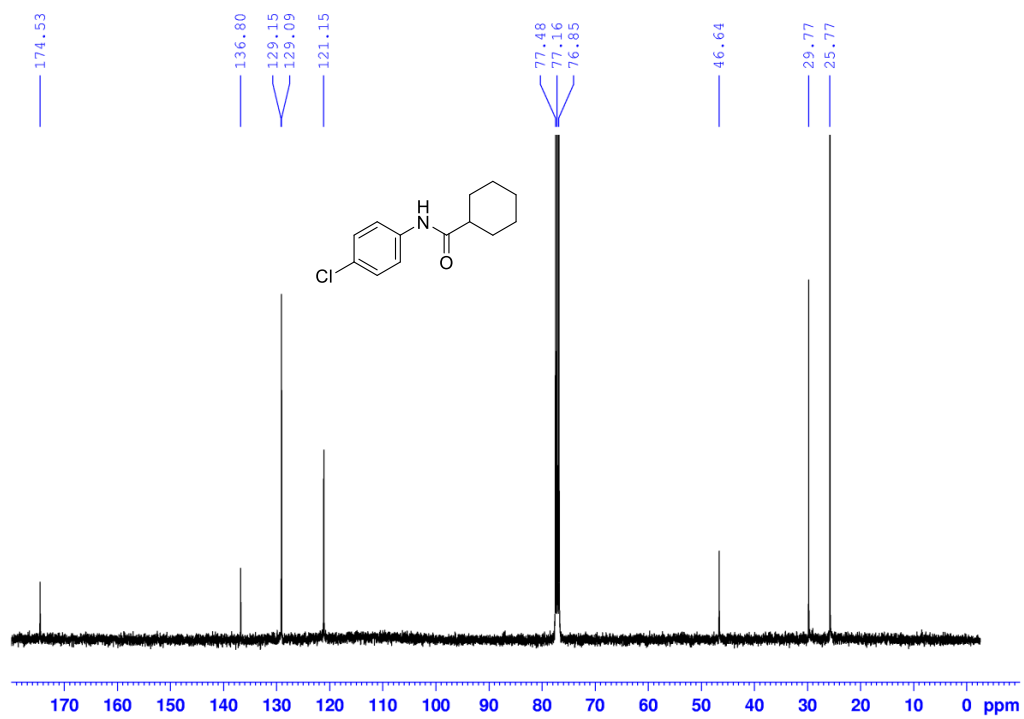

HNMR M004

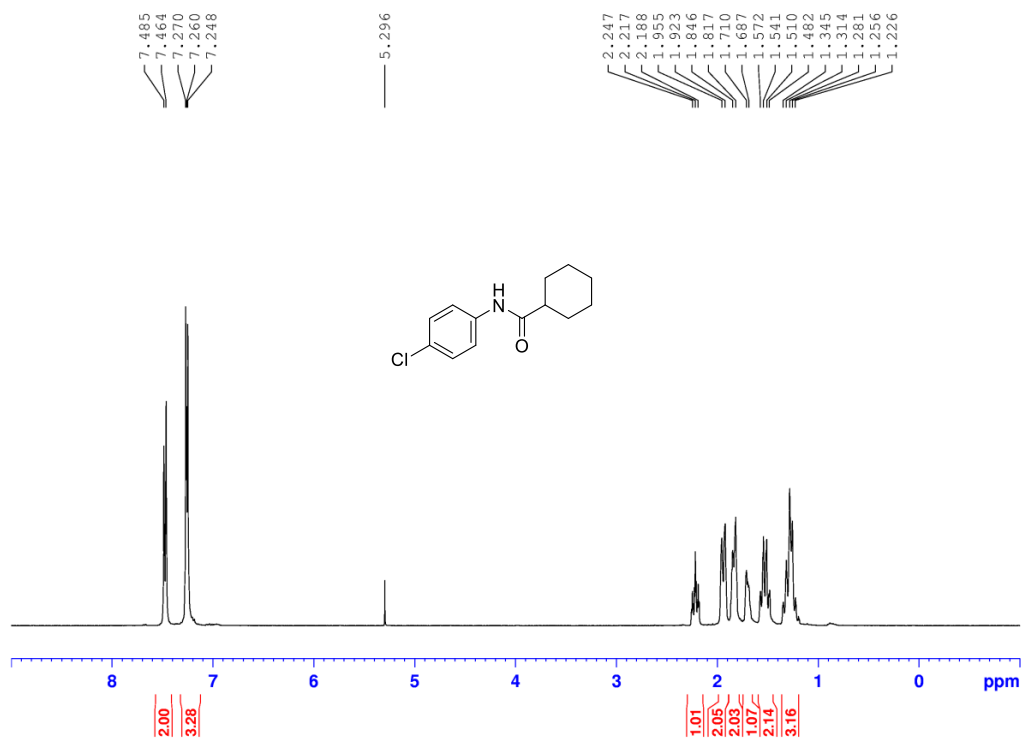

C13 M008

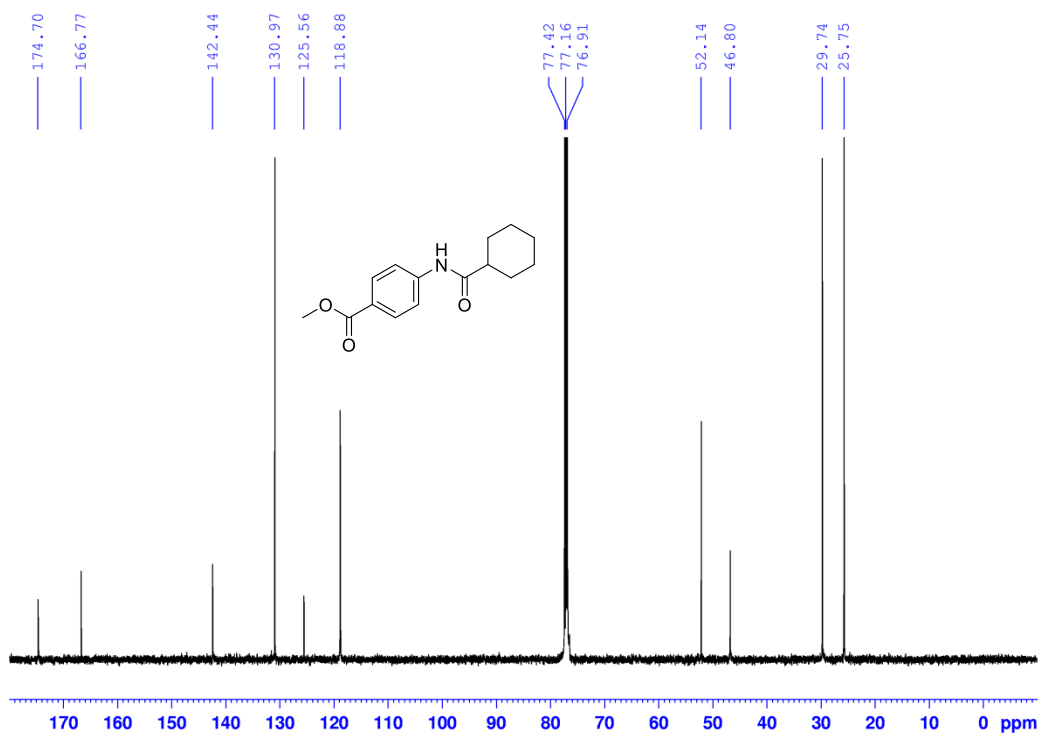

HNMR M008

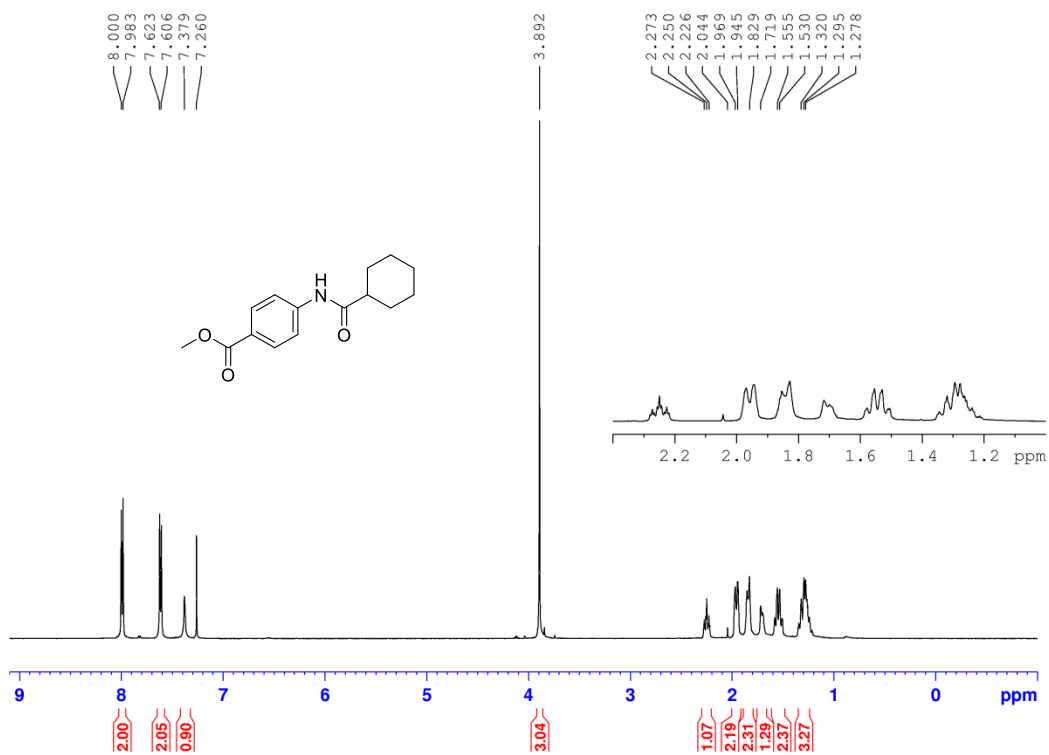



CNMR M014

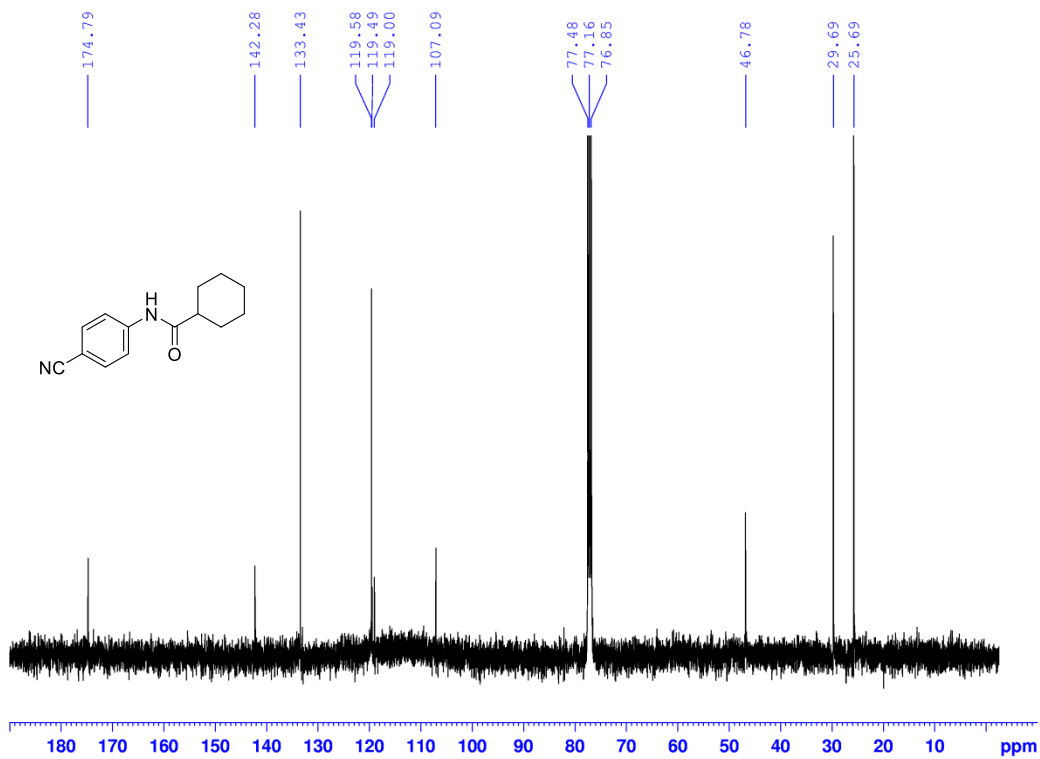

HNMR M014

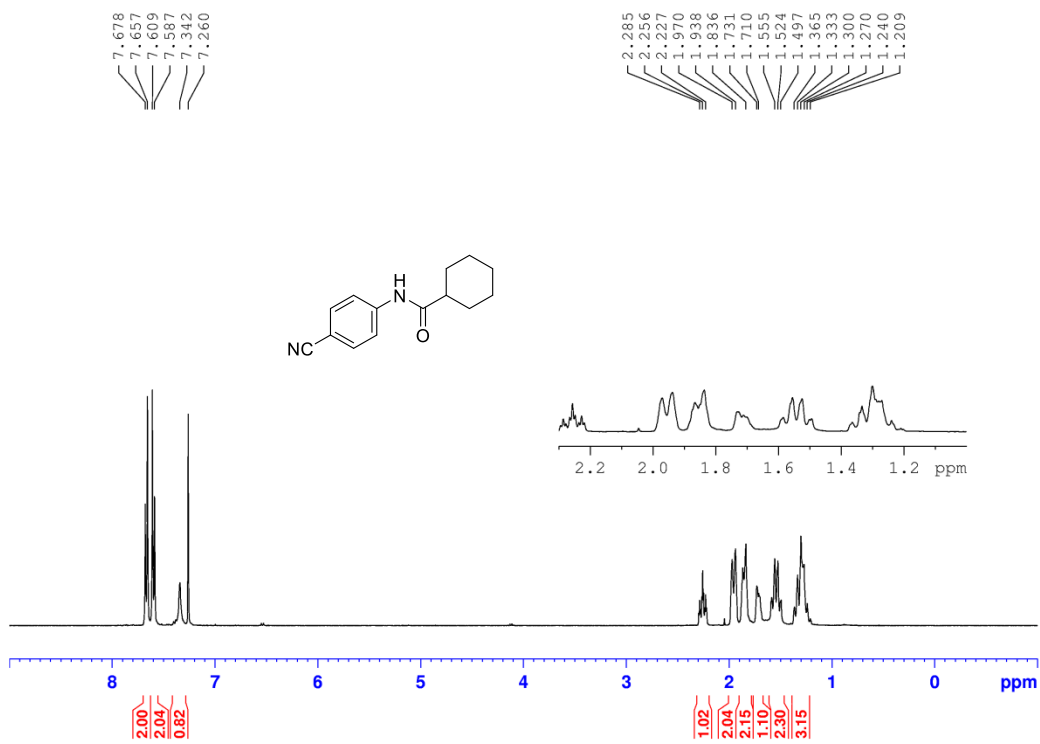

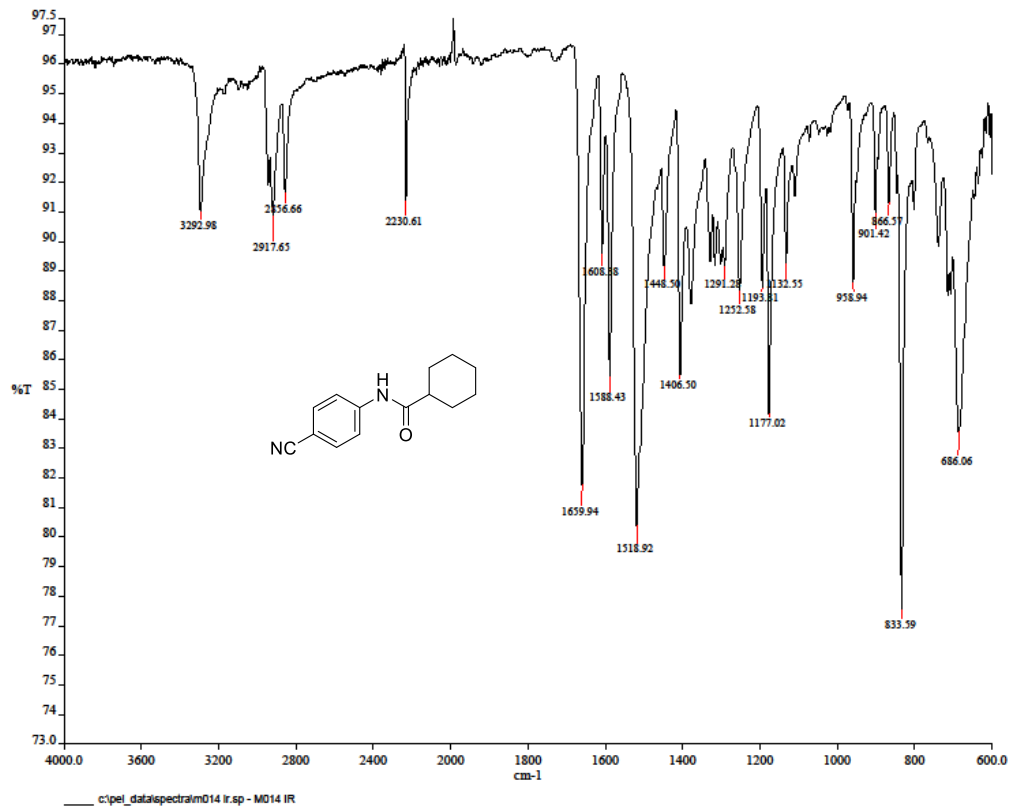

C13 M003

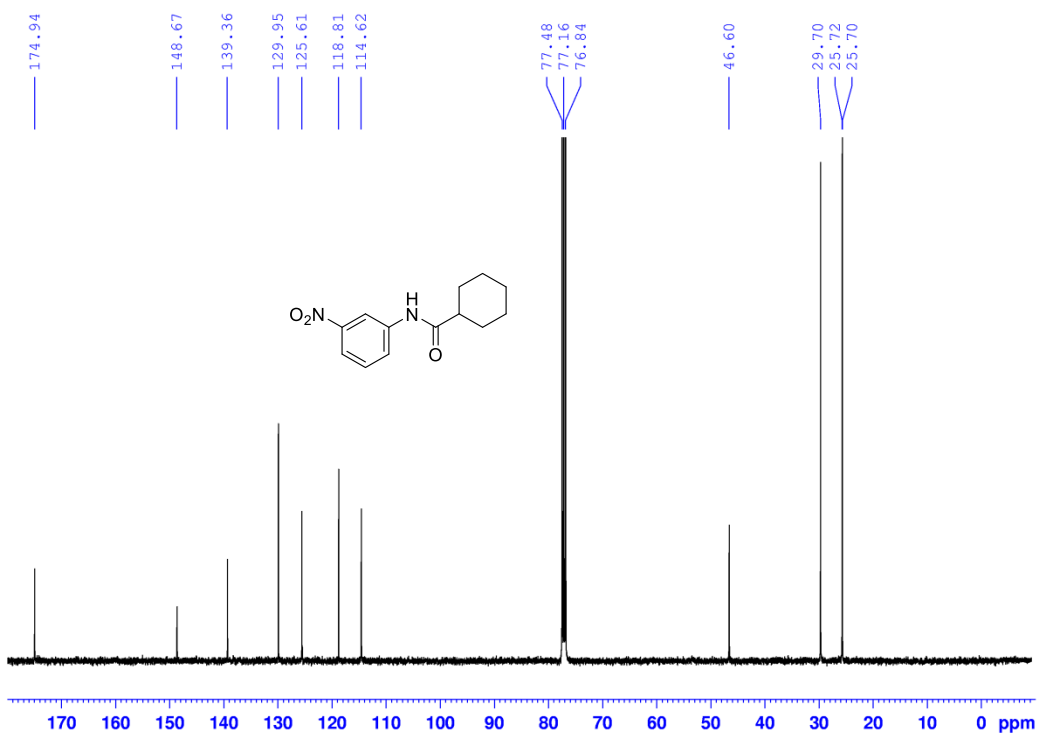

HNMR M003

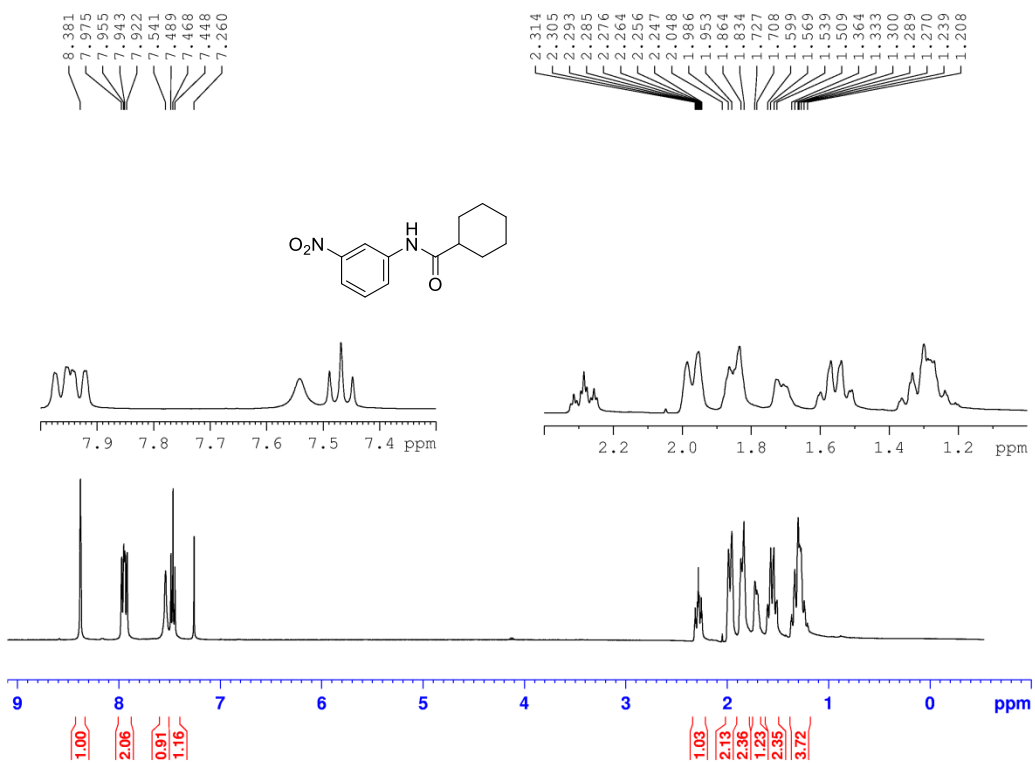

FNMR M013 CDC13

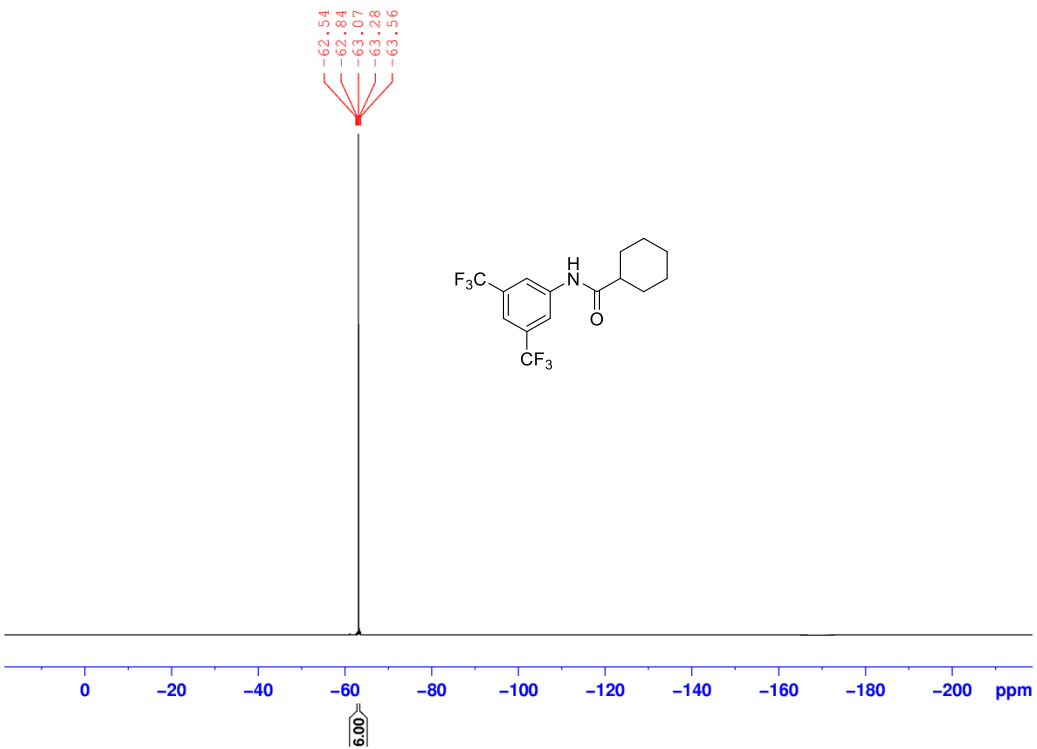

CNMR M013

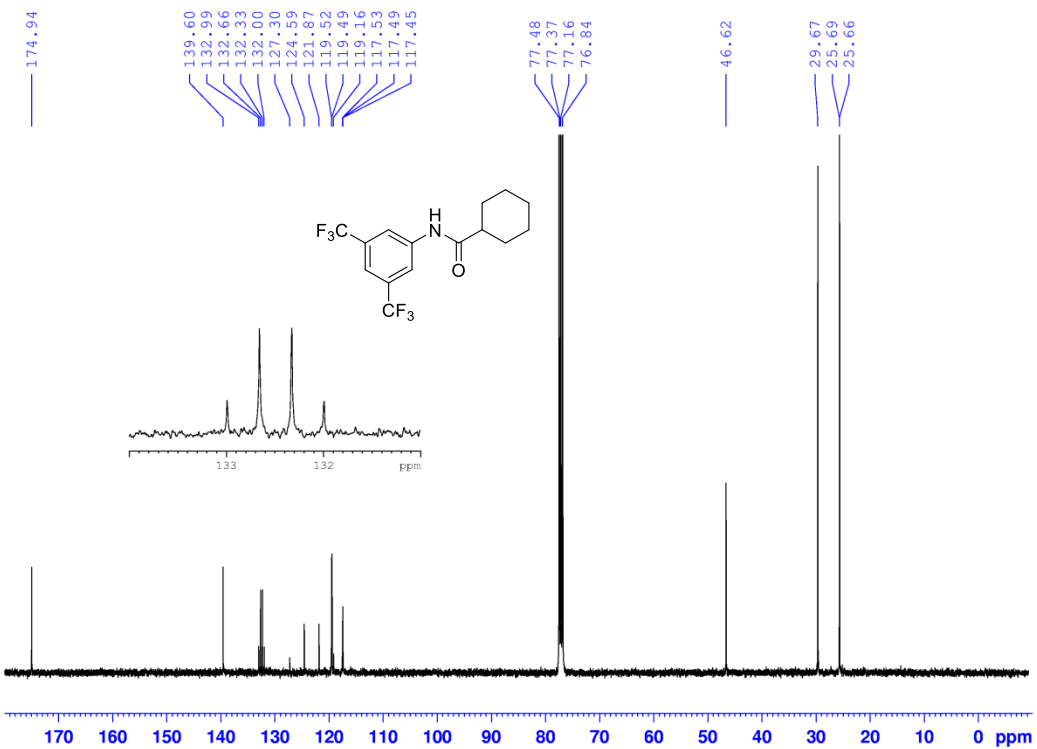

HNMR M013

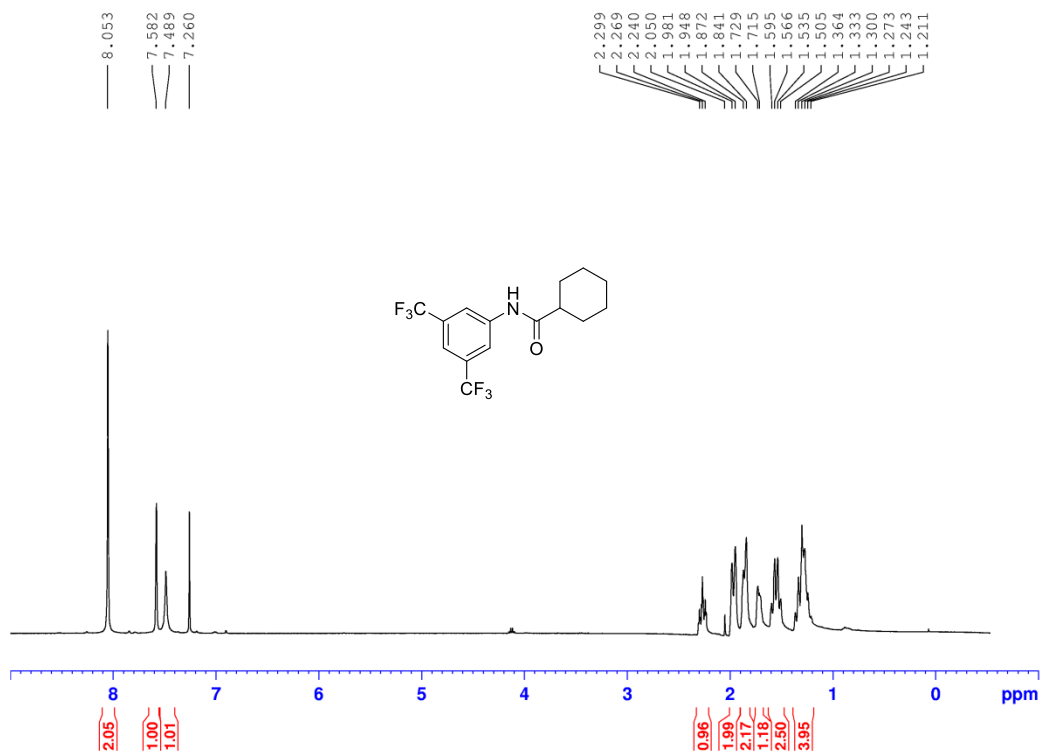

F19, CDCl3

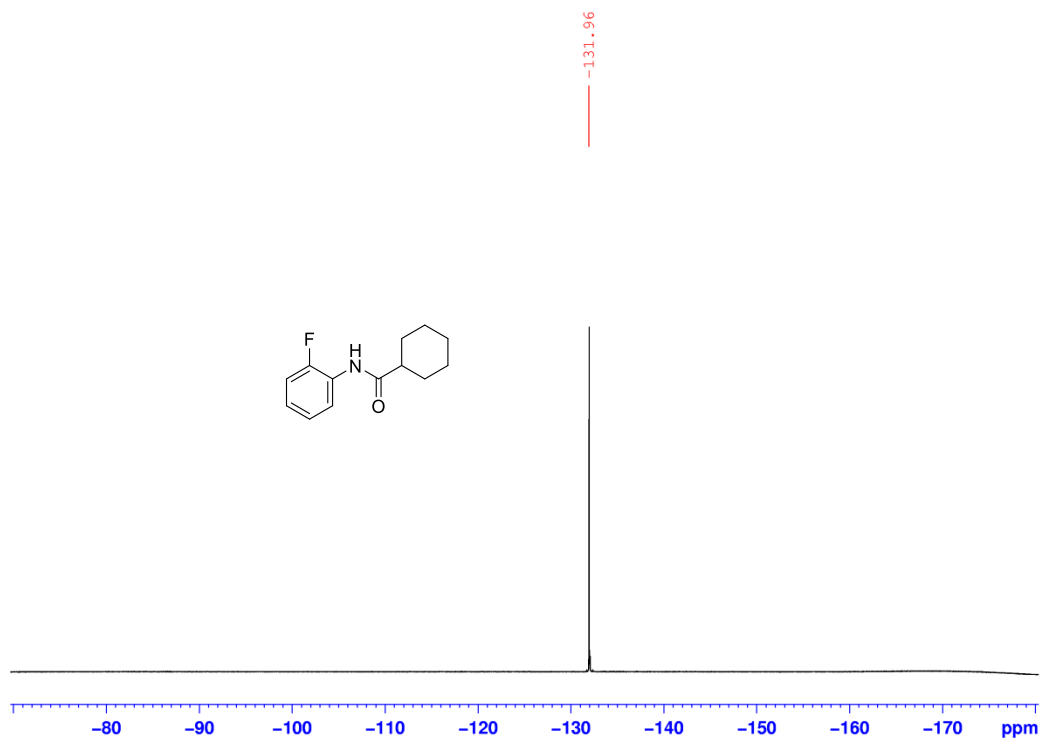

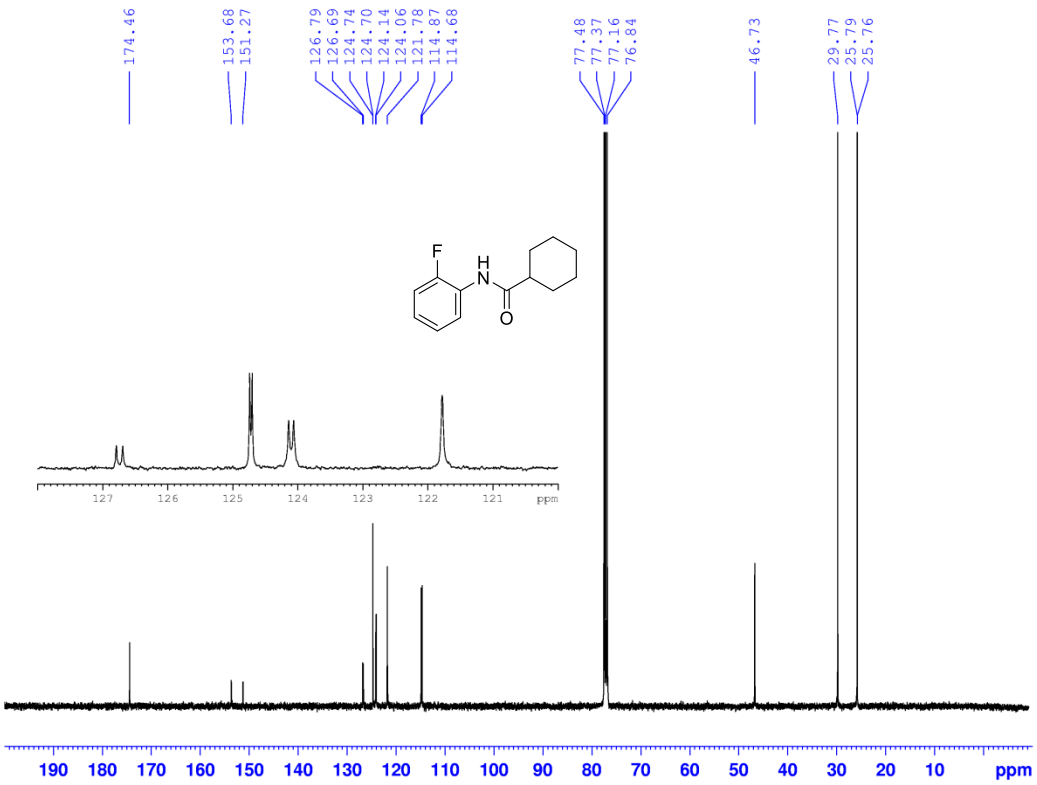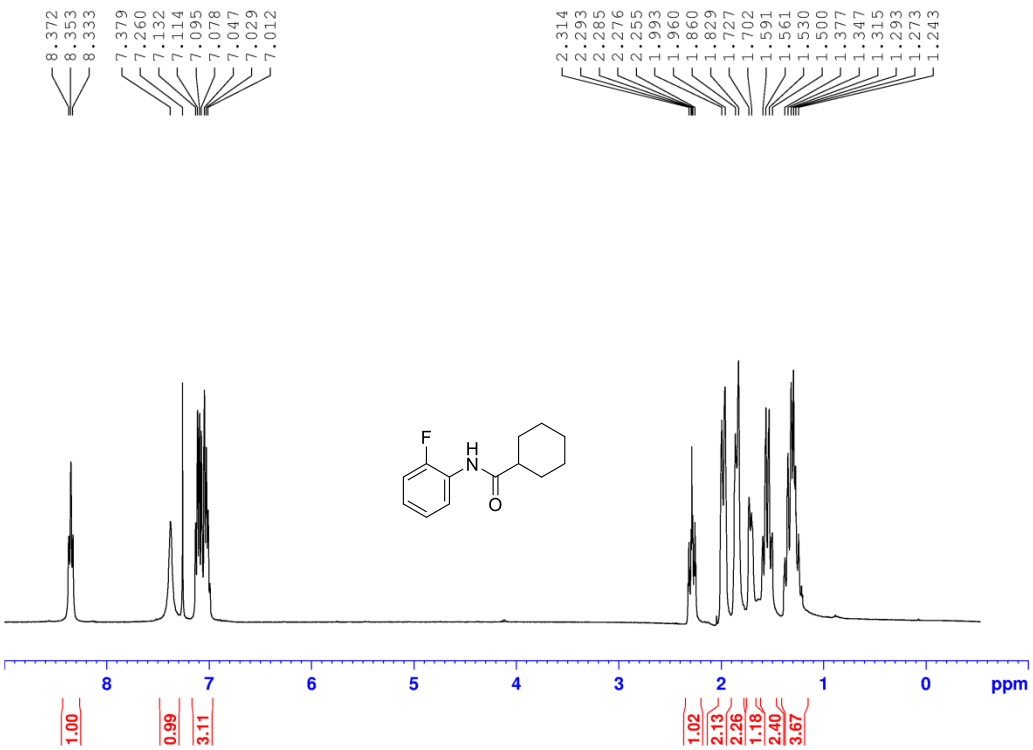

C13NMR M011

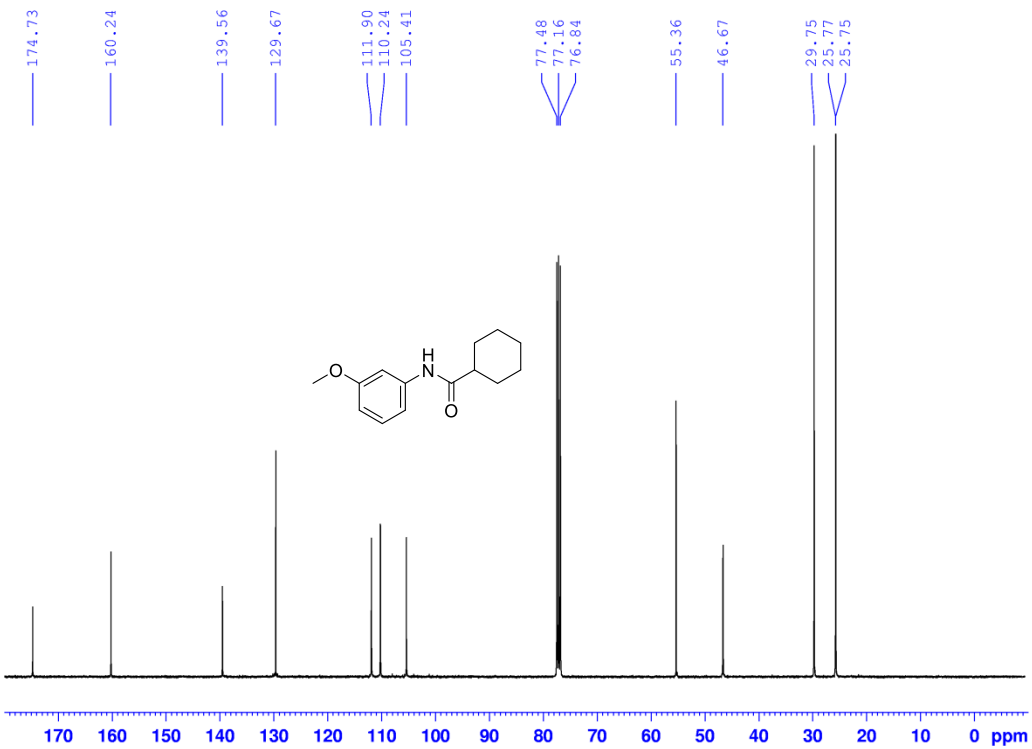

HNMR M011

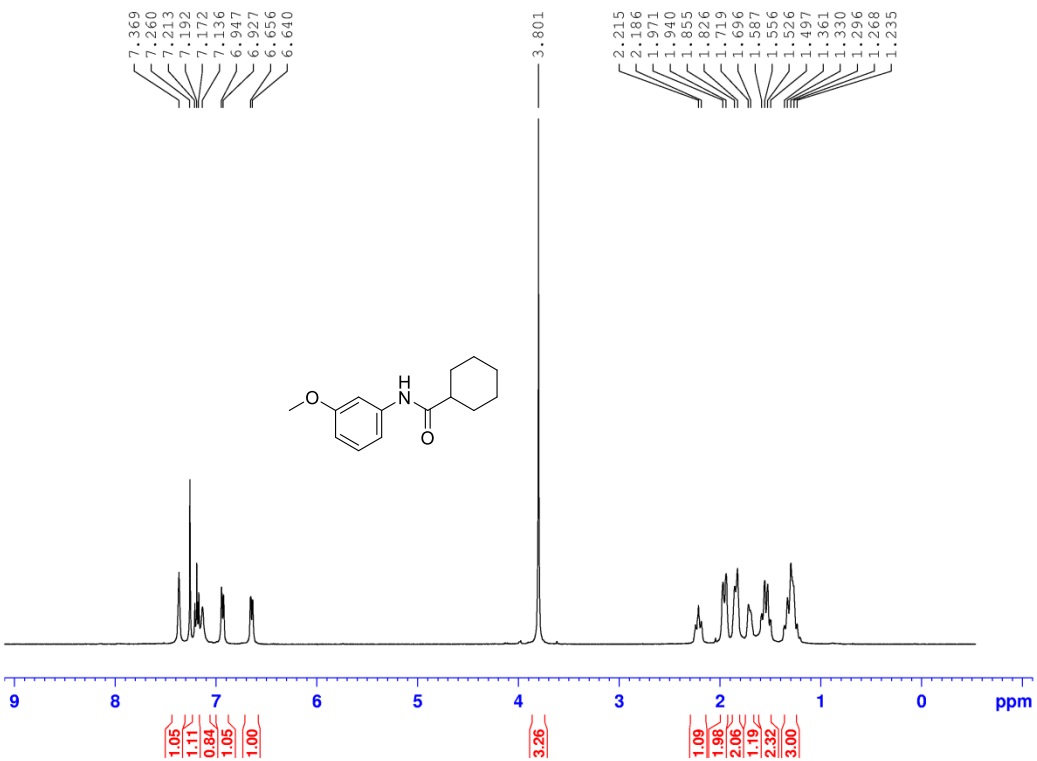

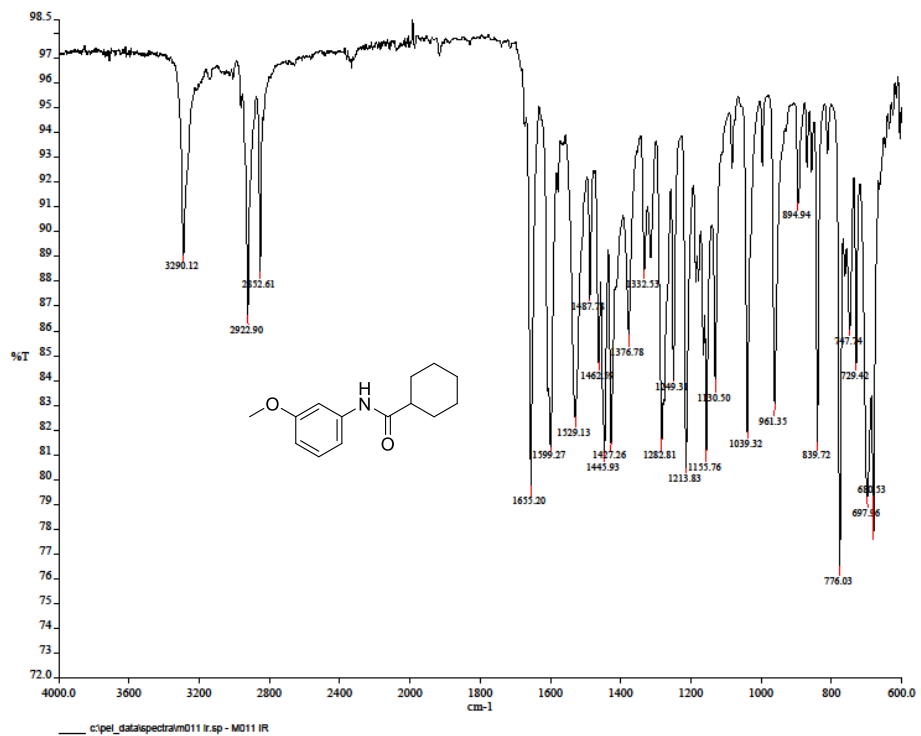



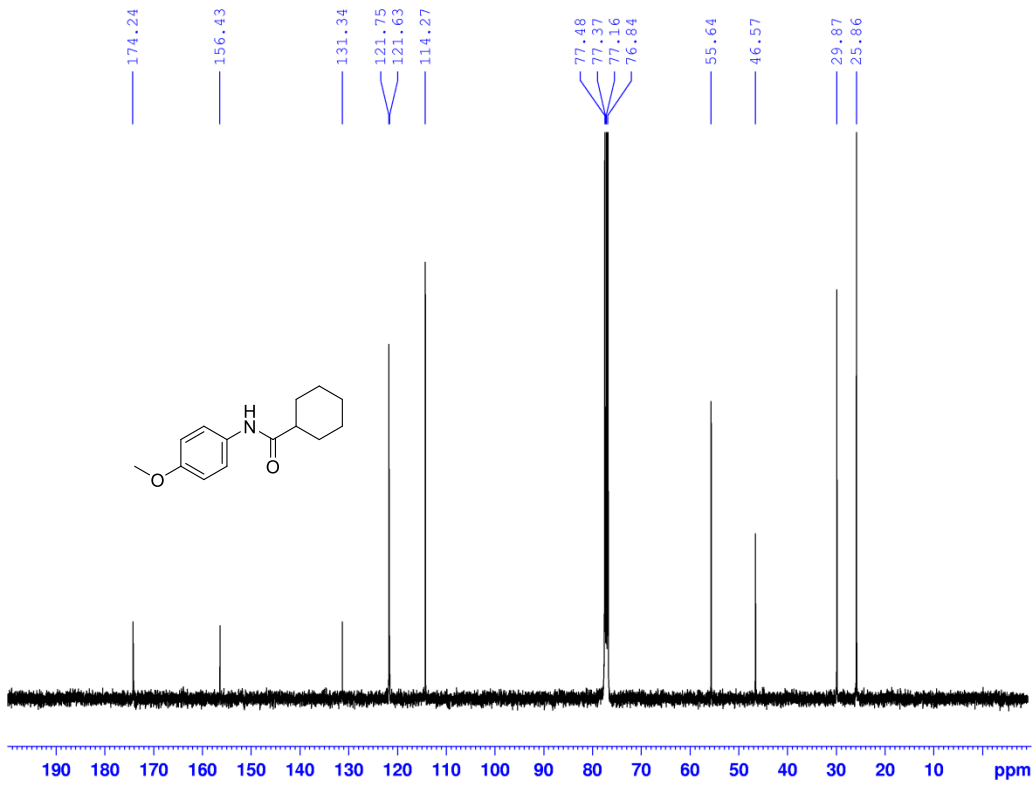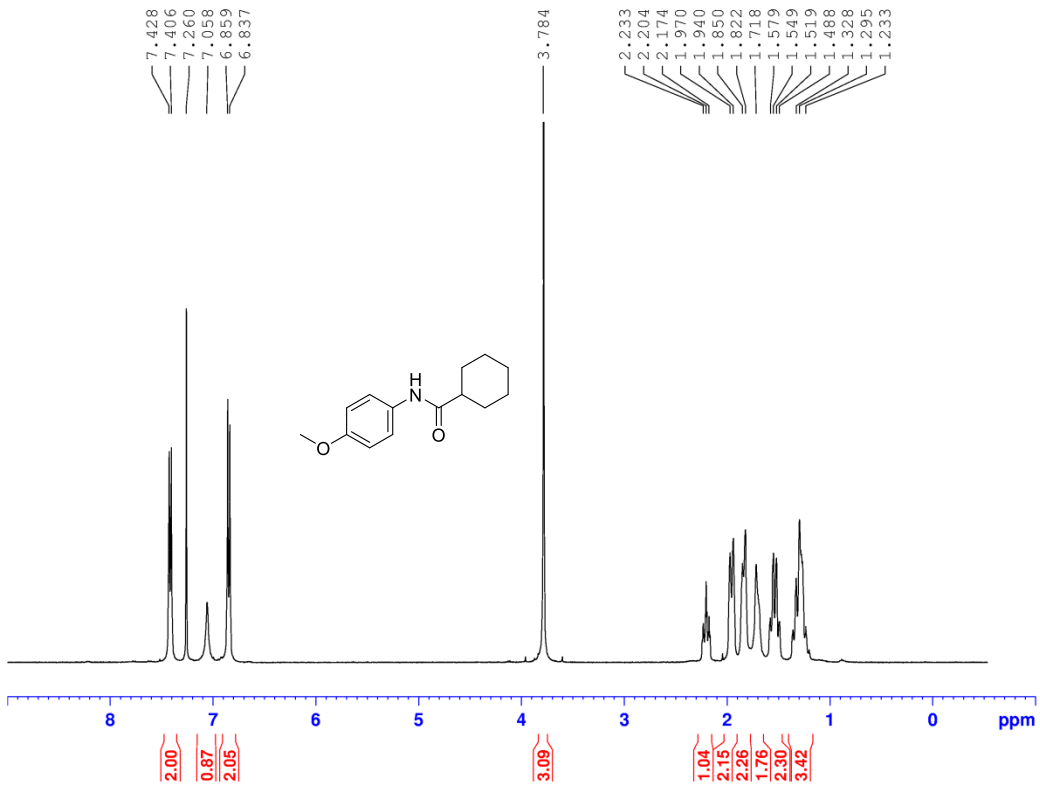

C13NMR M010

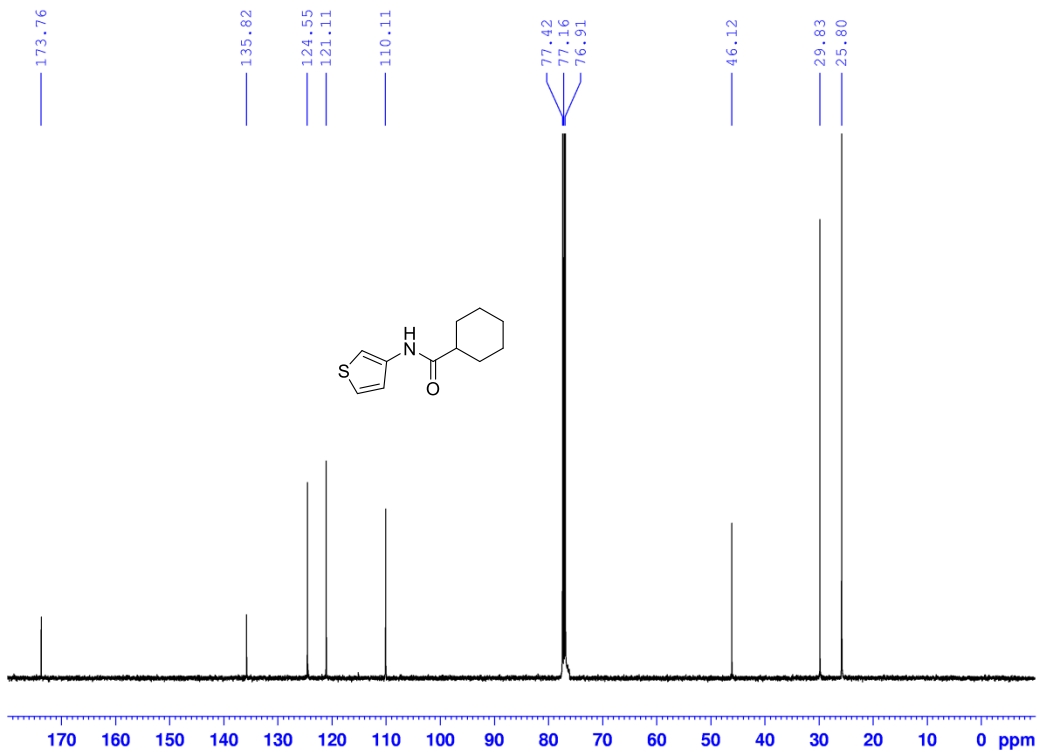

HNMR M010

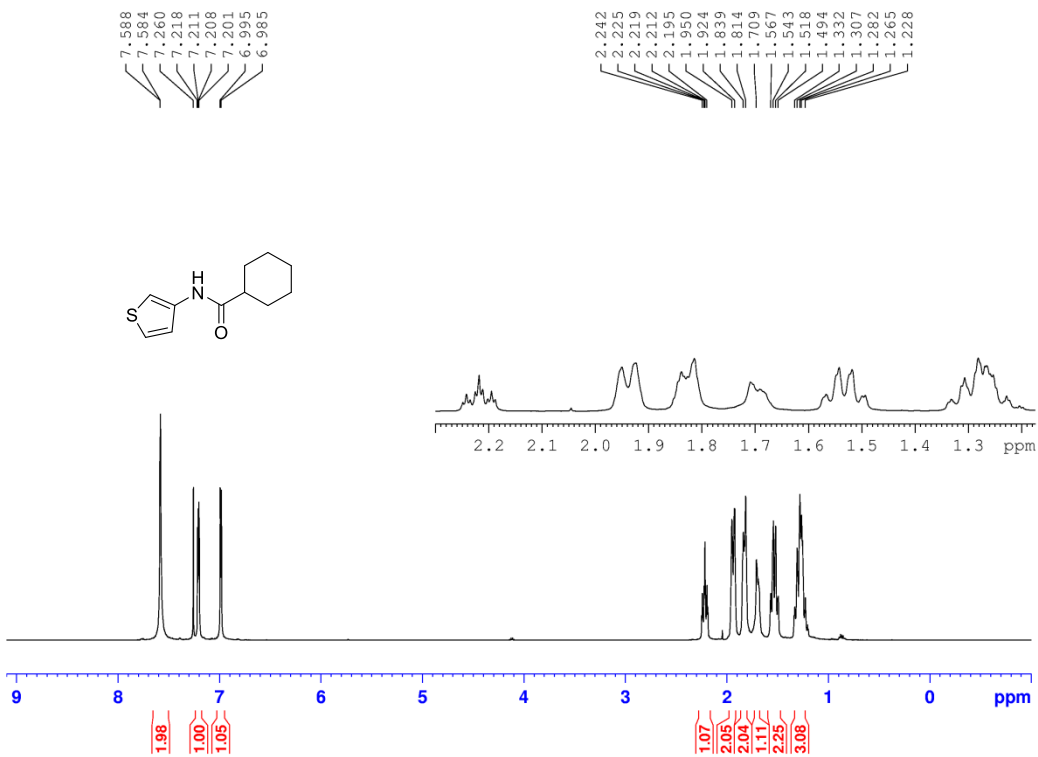

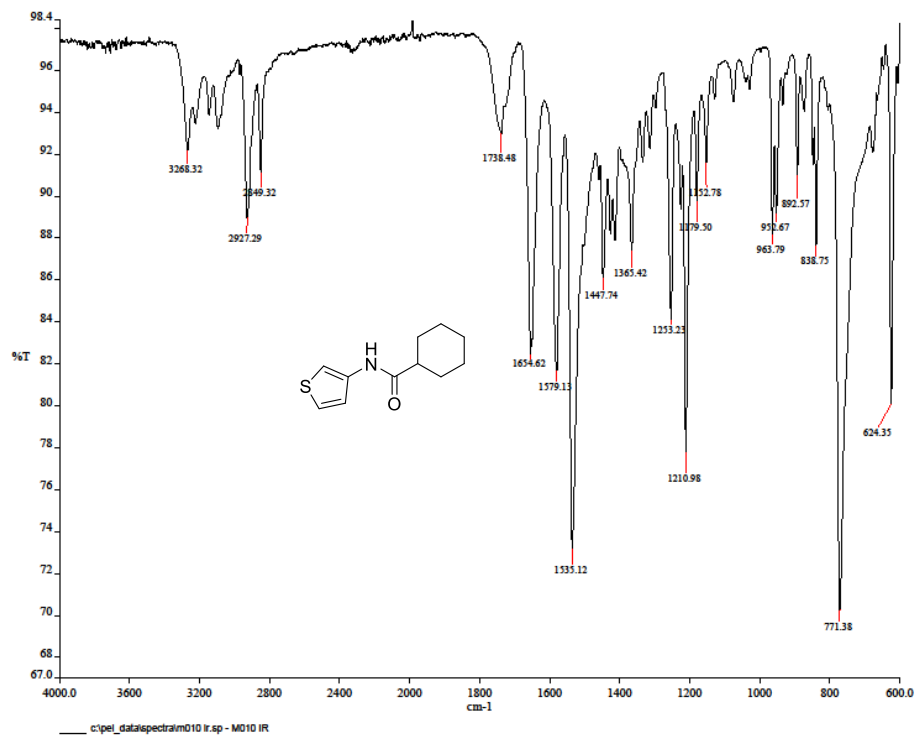

C13NMR M009

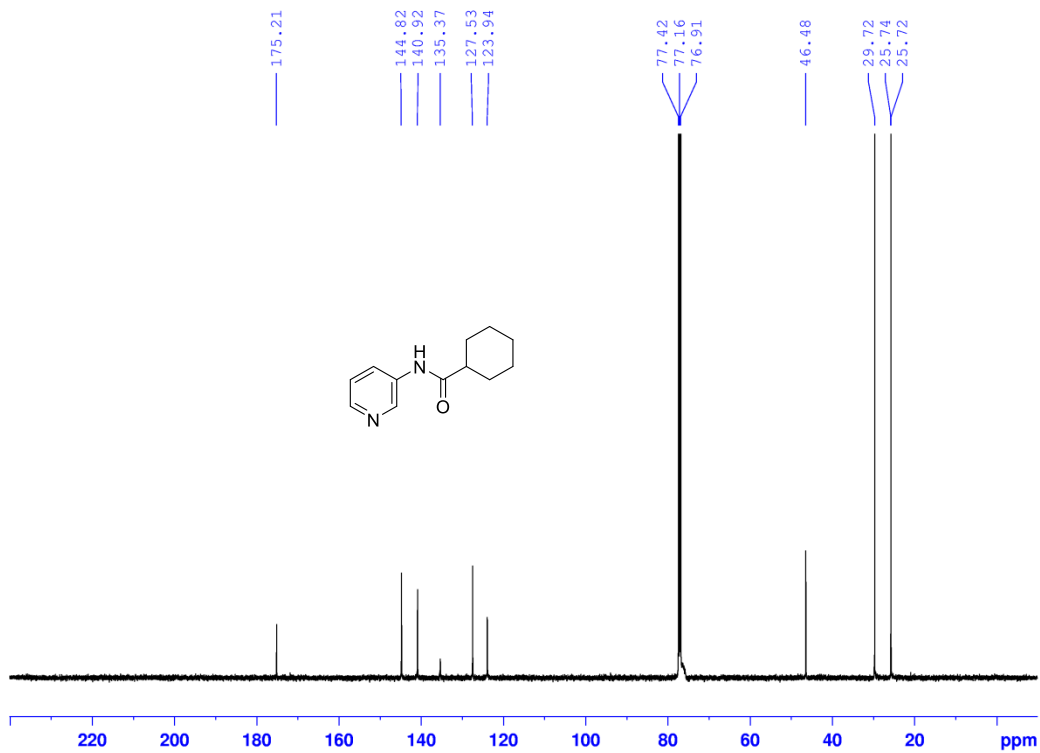

HNMR M009

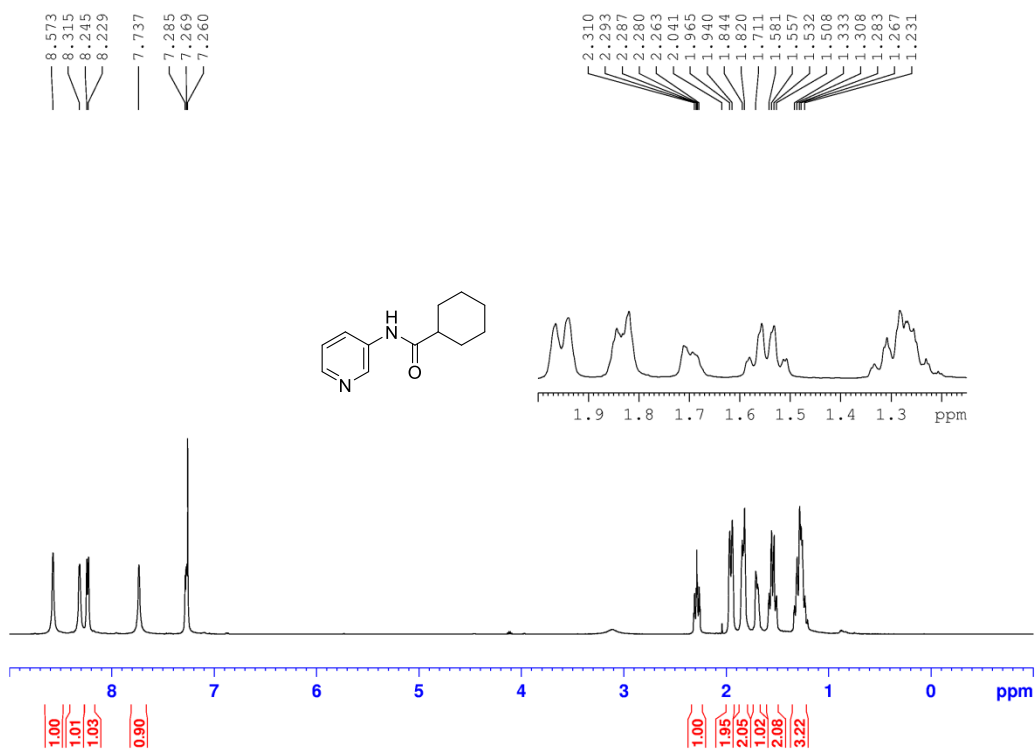

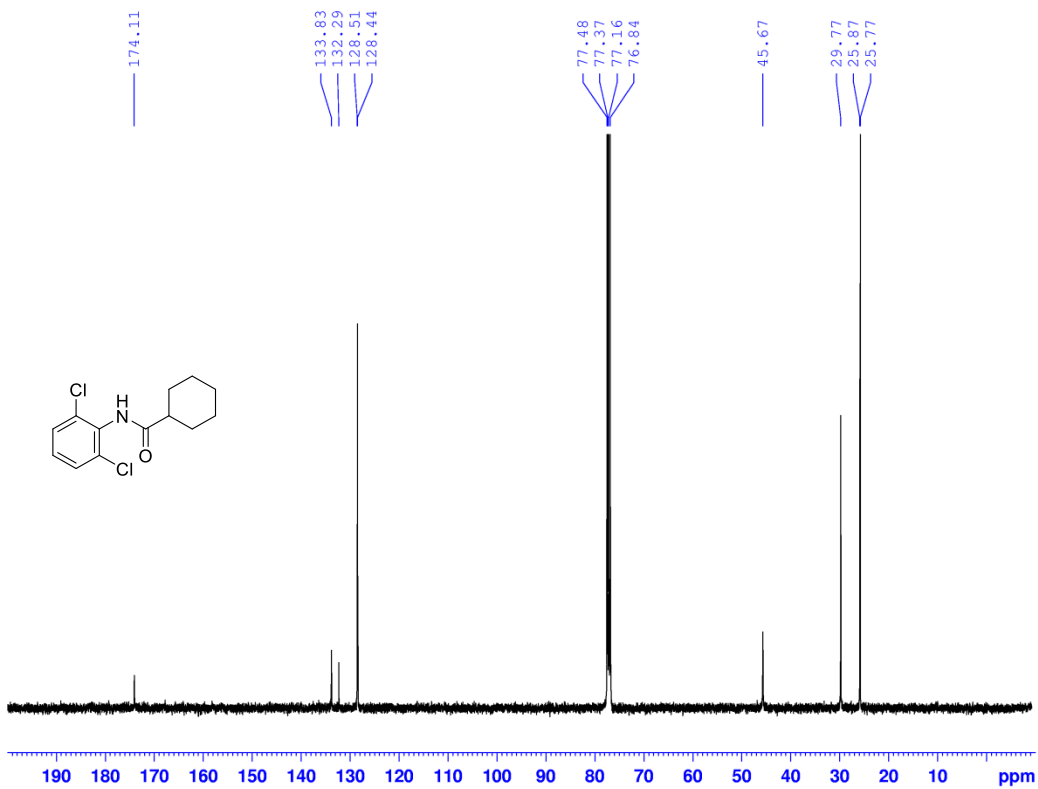

400MHz

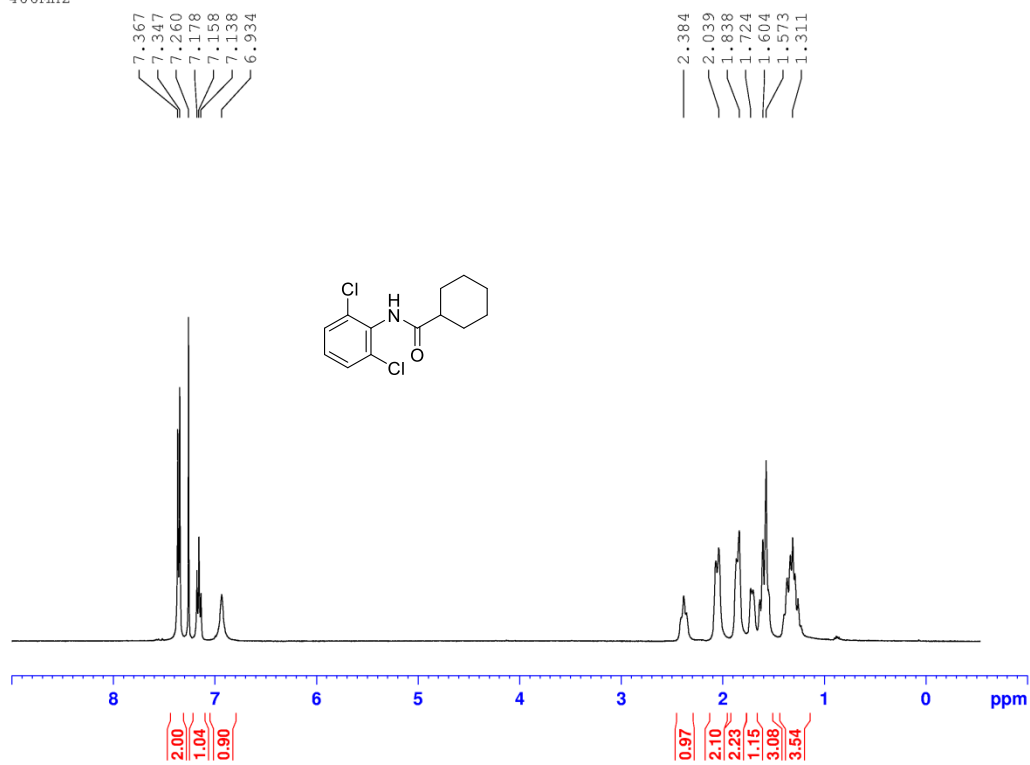

C13NMR L077Pa

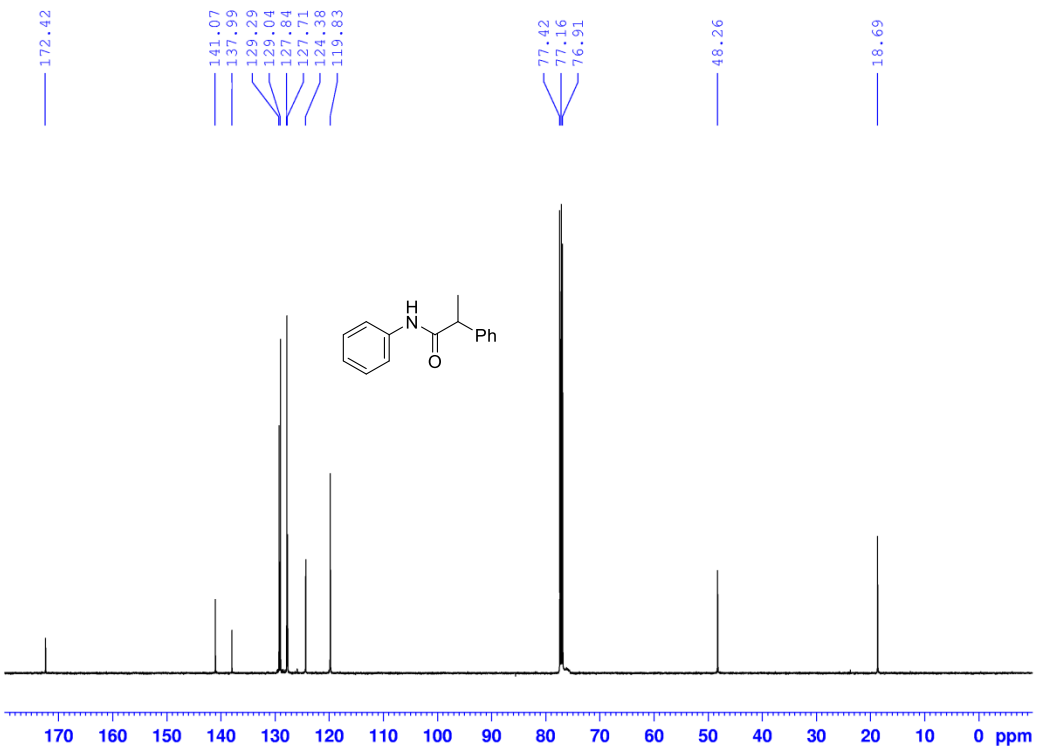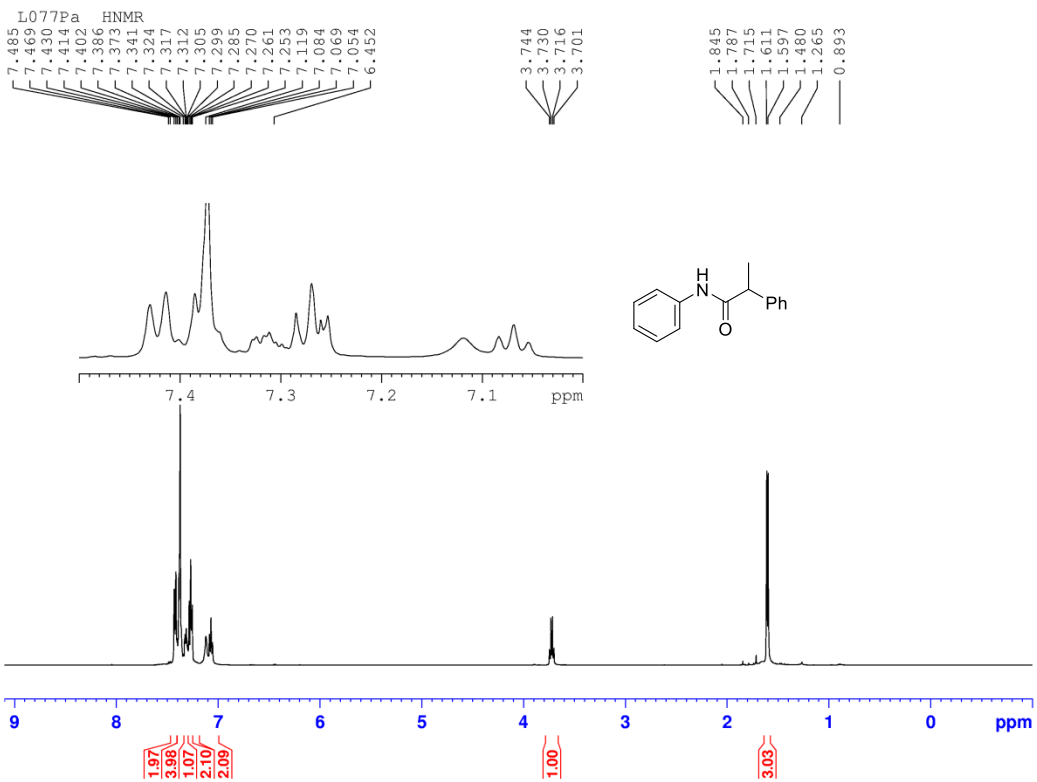

C-NMR L076

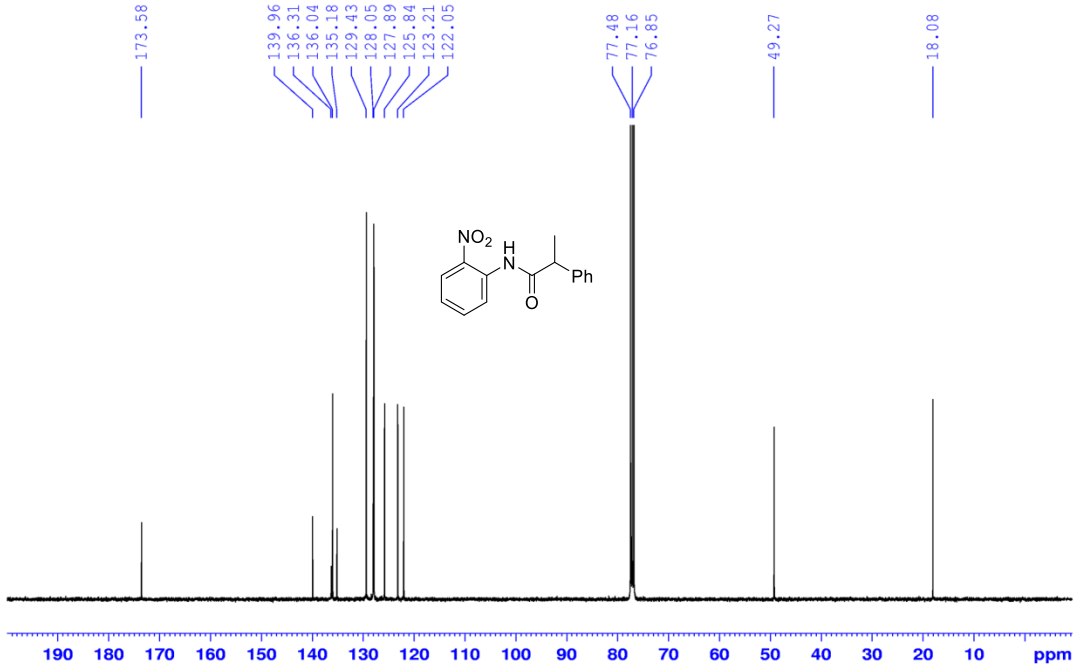

H-NMR L076

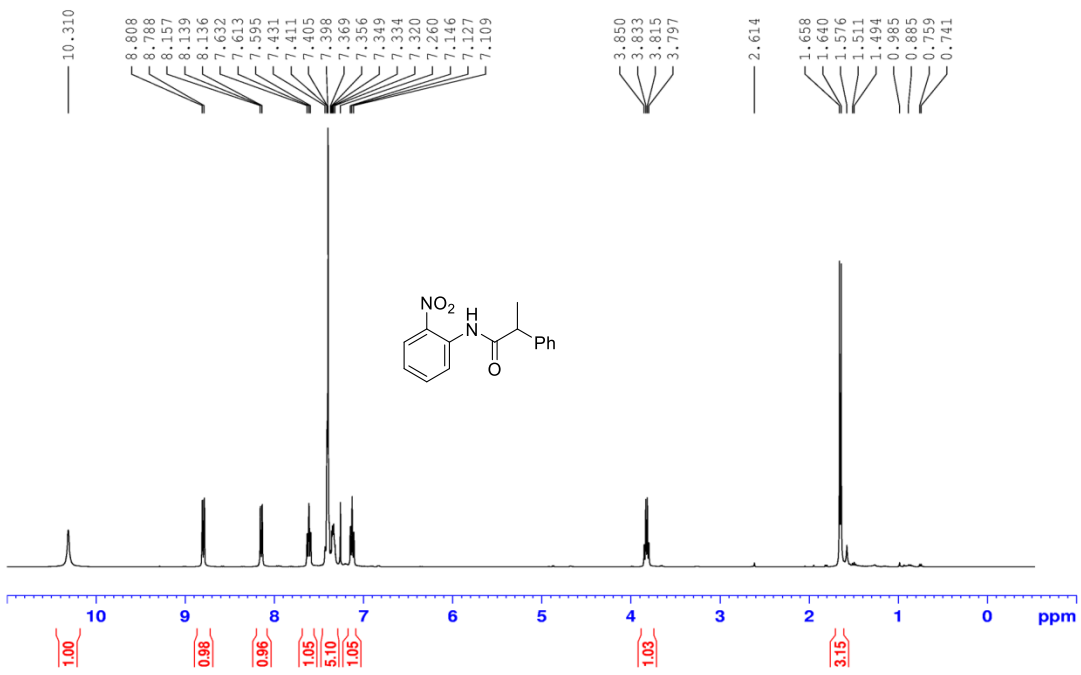

C-NMR L078

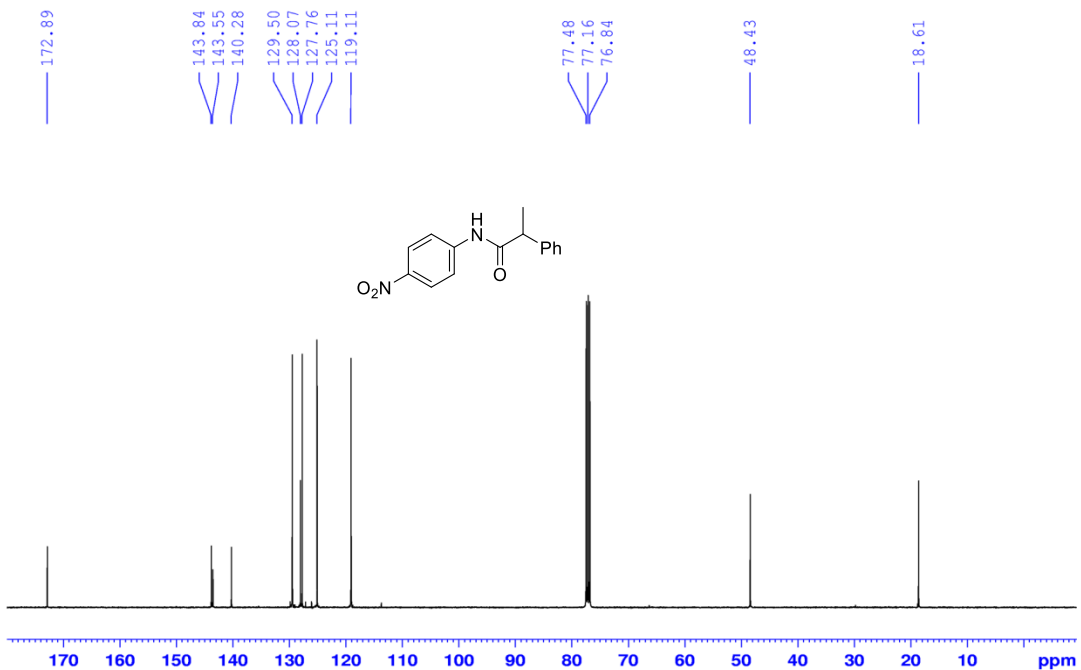

HNMR L078

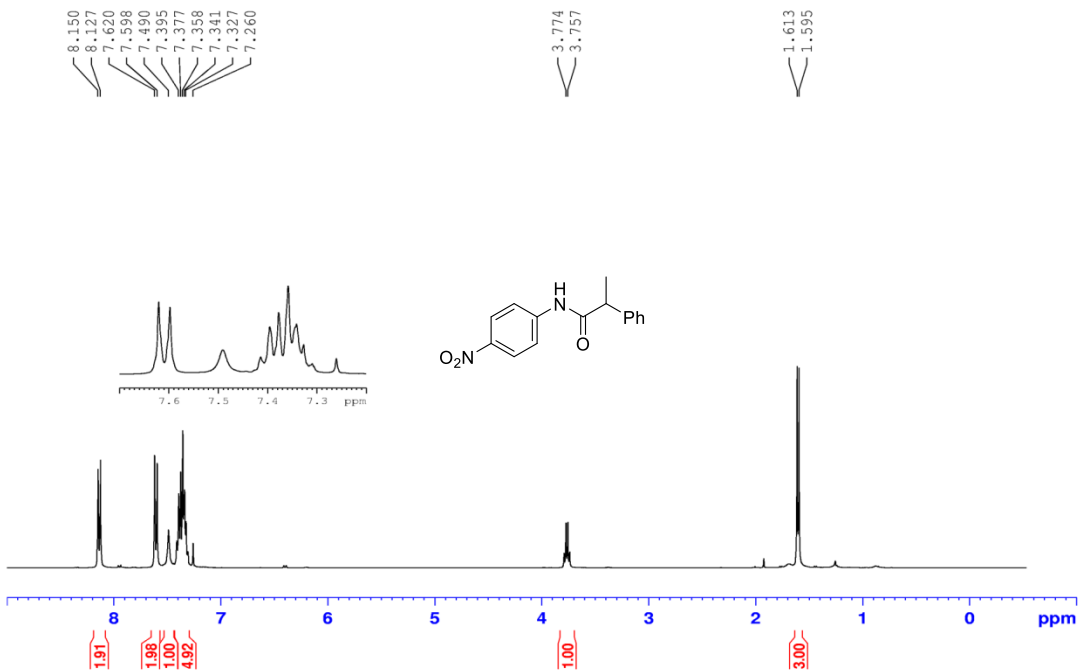



CNMR L082

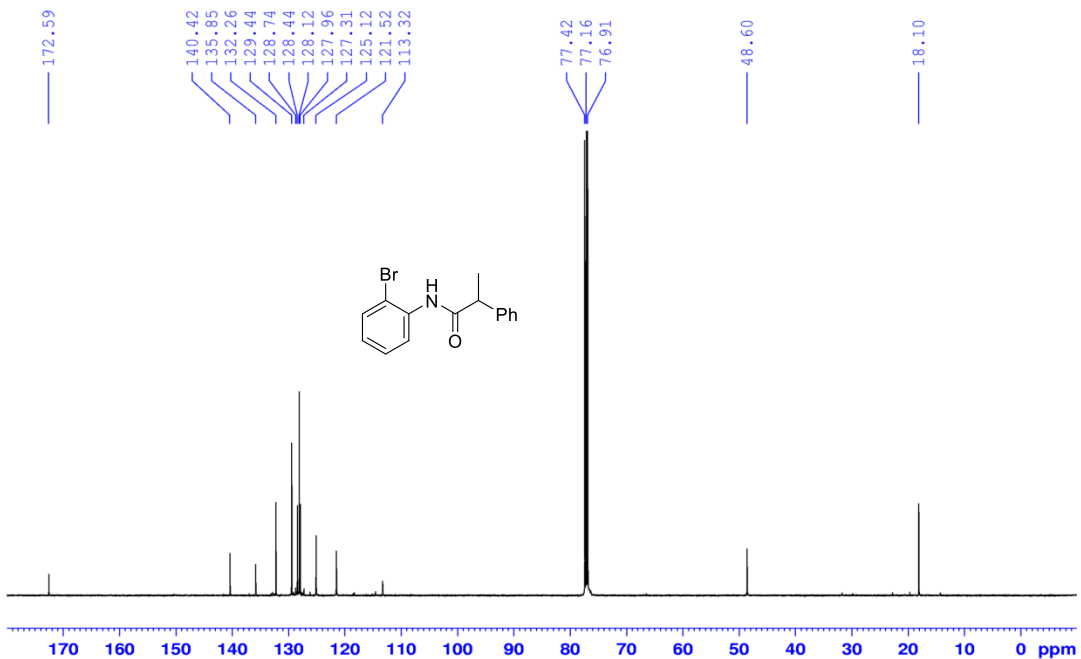

HNMR L082

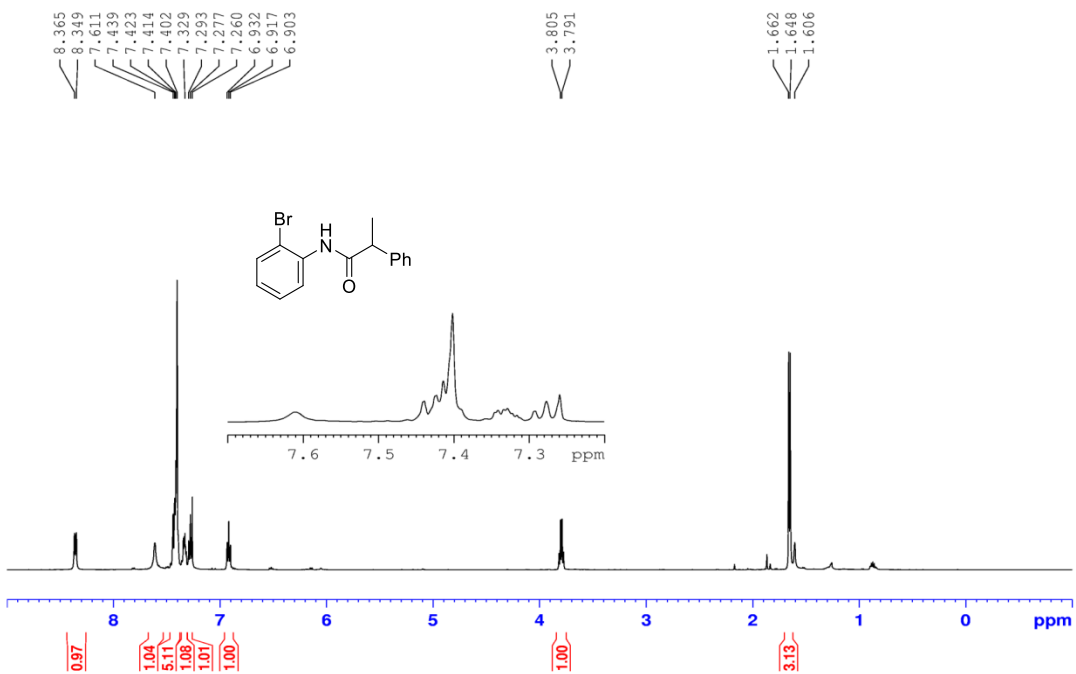

CNMR L102

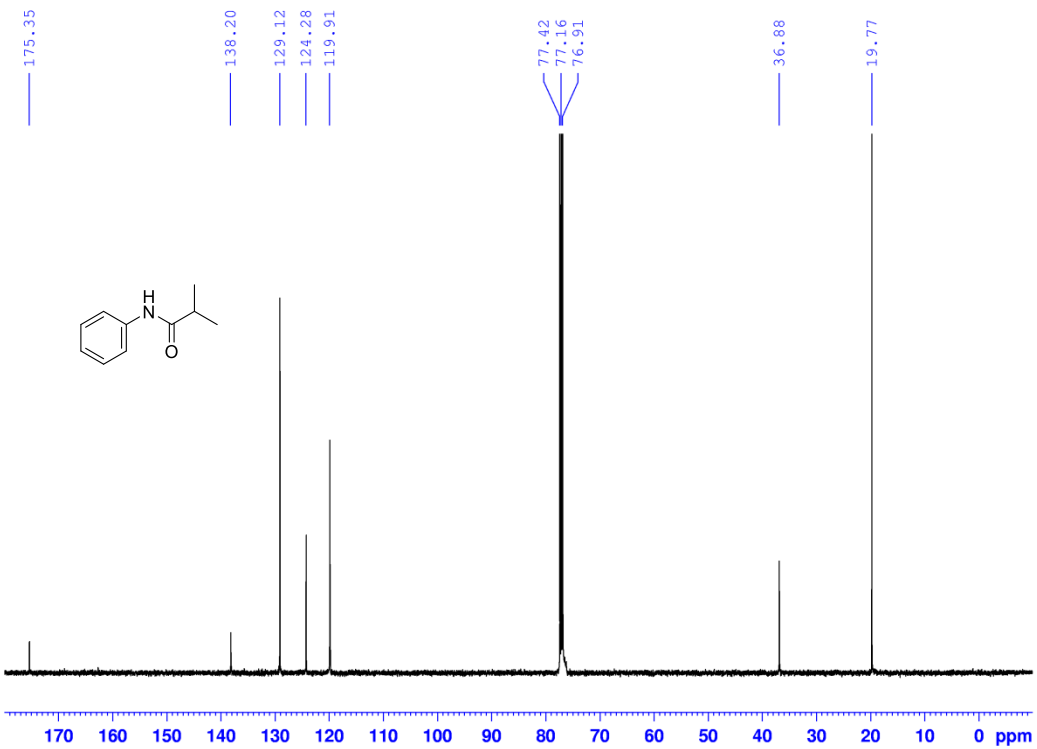

HNMR L102

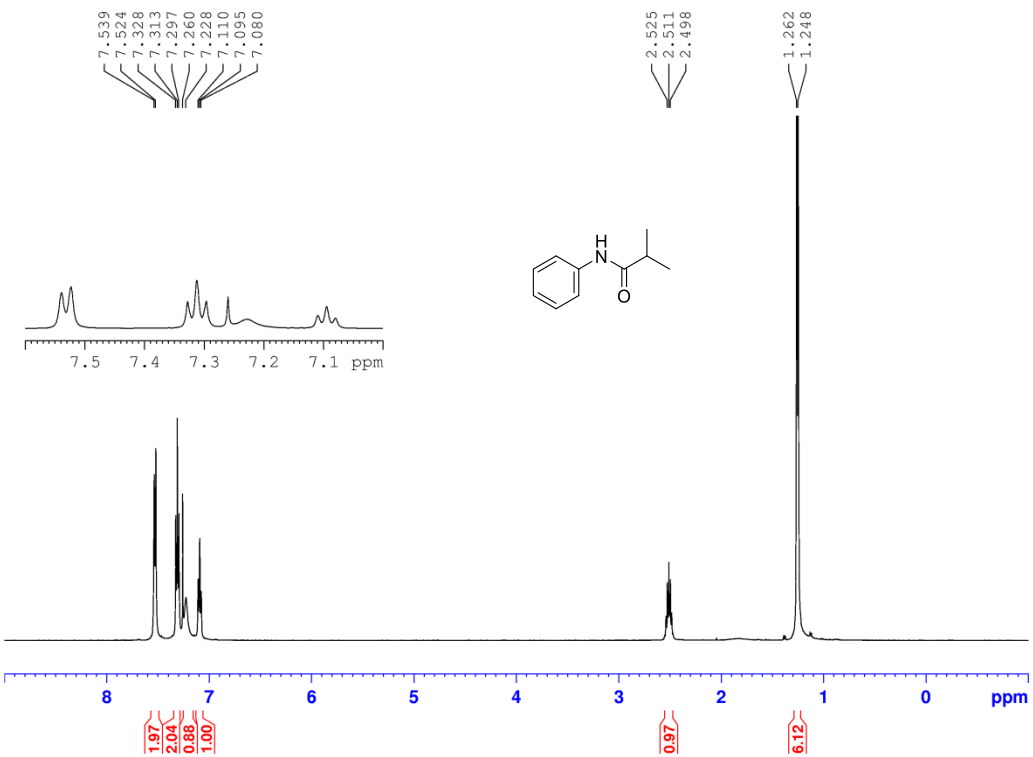

CNMR L100

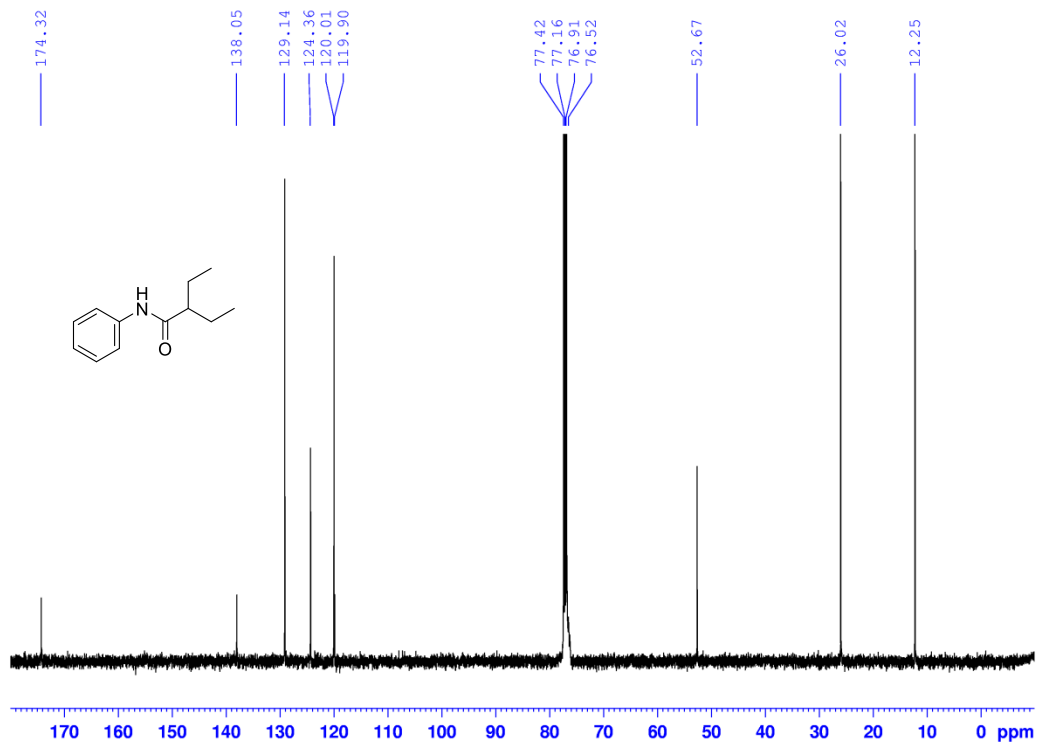

HNMR L100

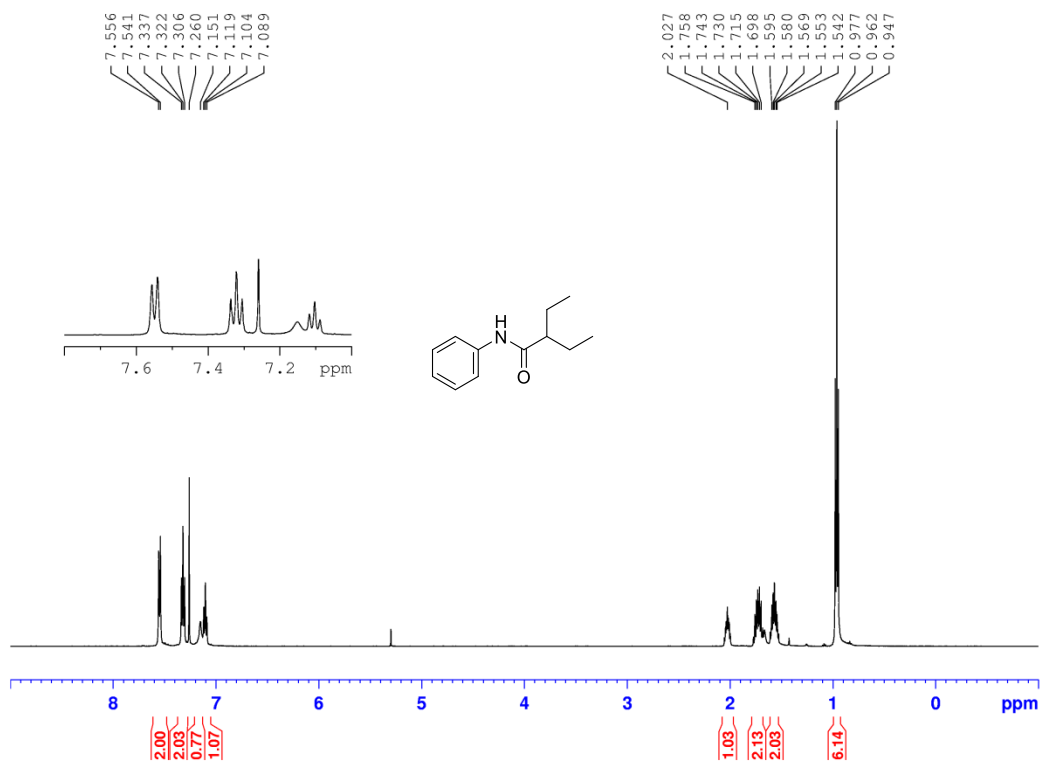

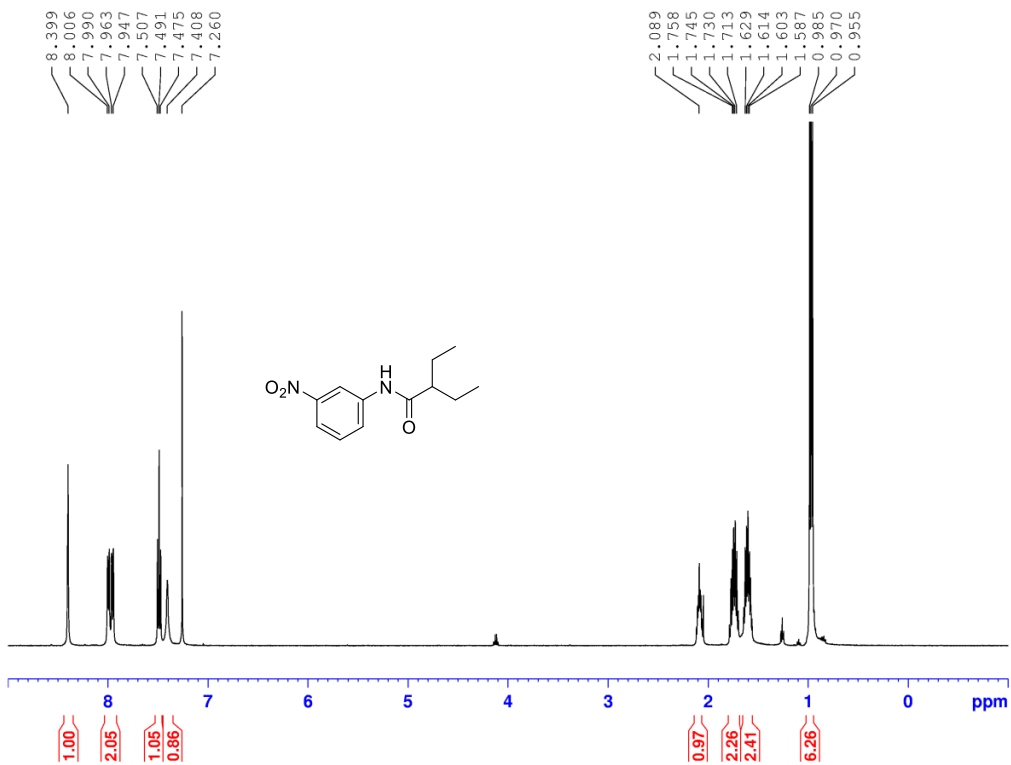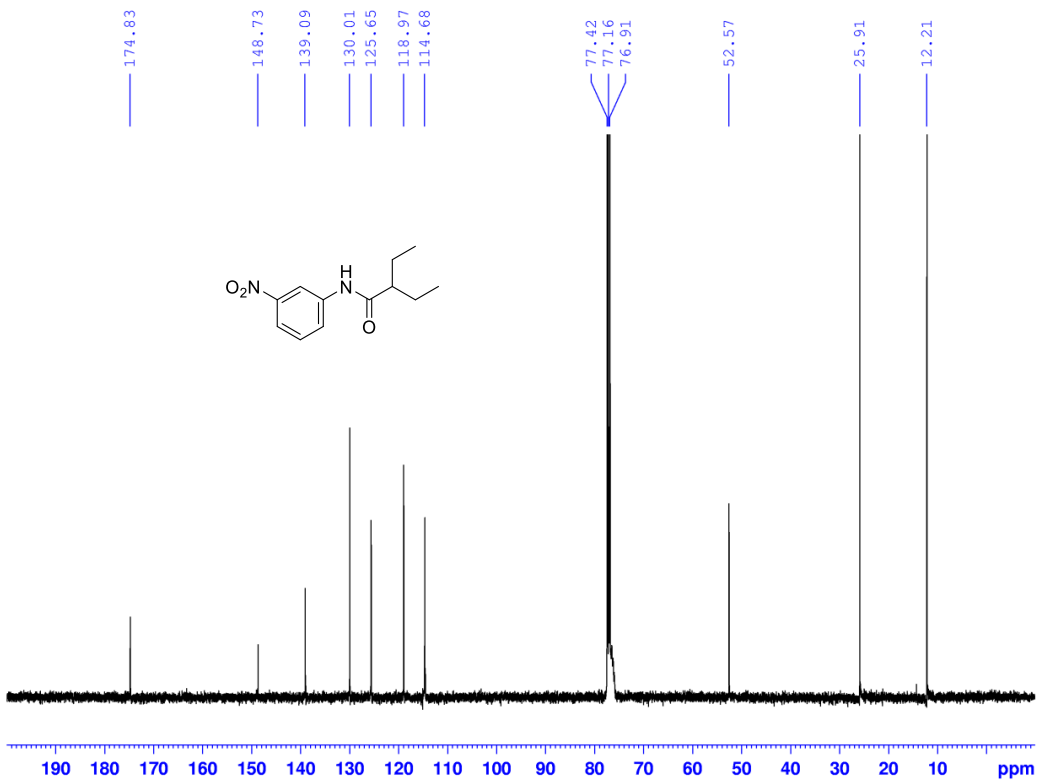

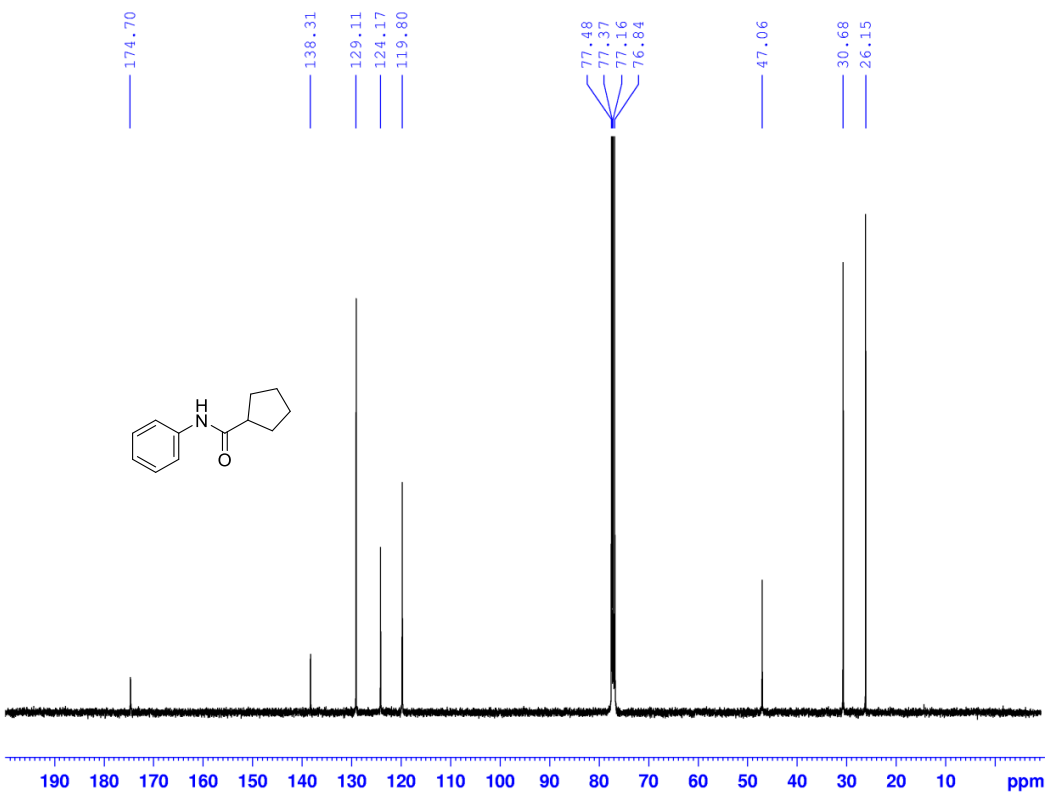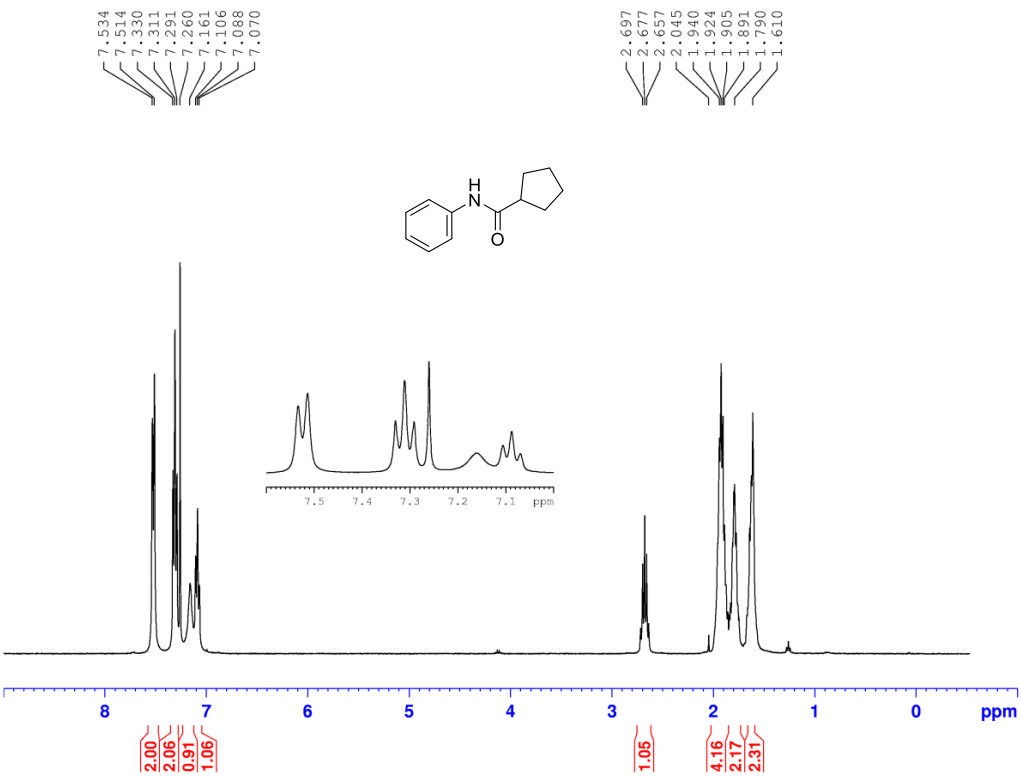

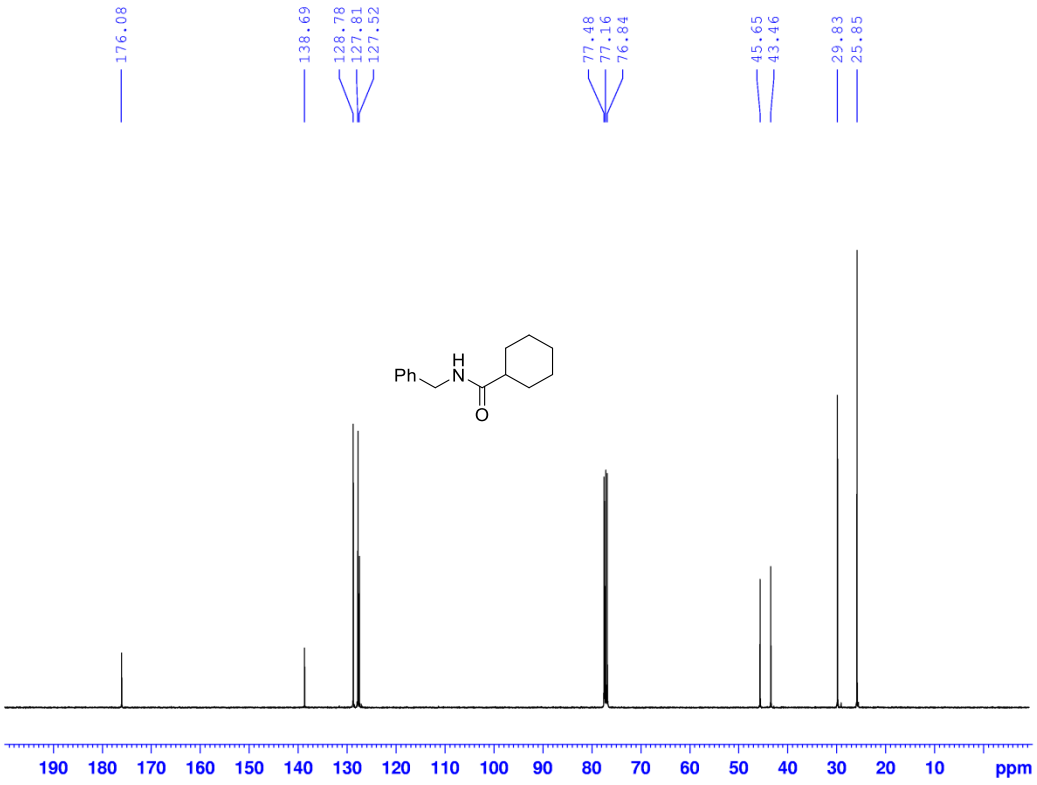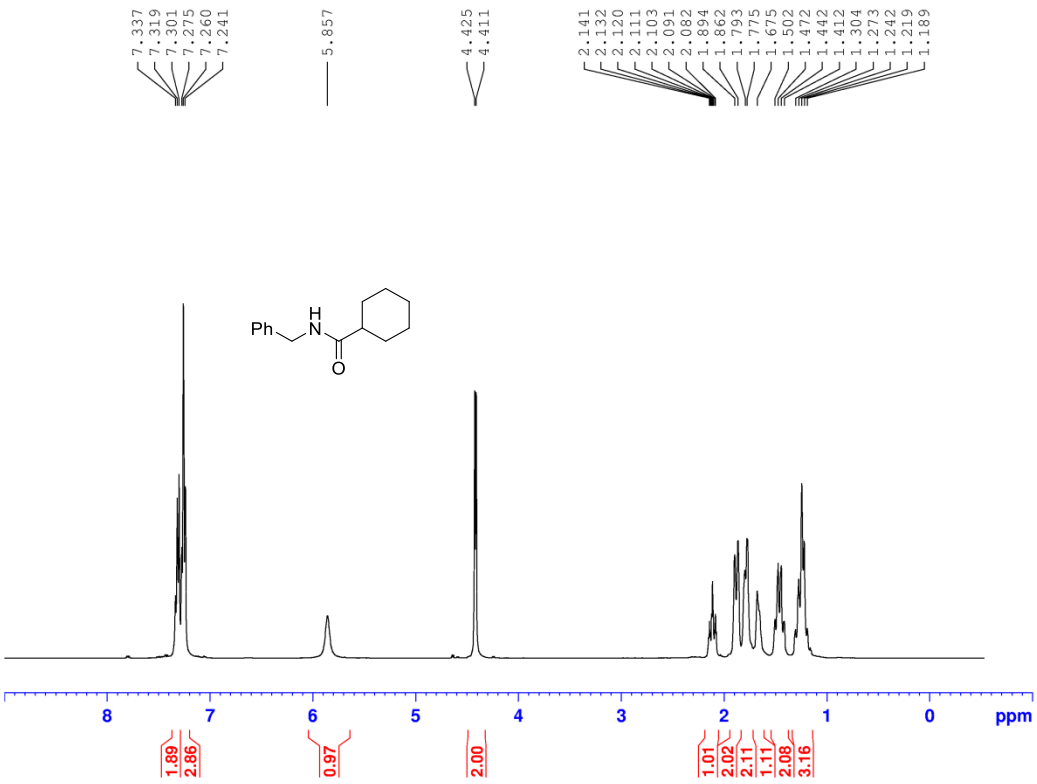

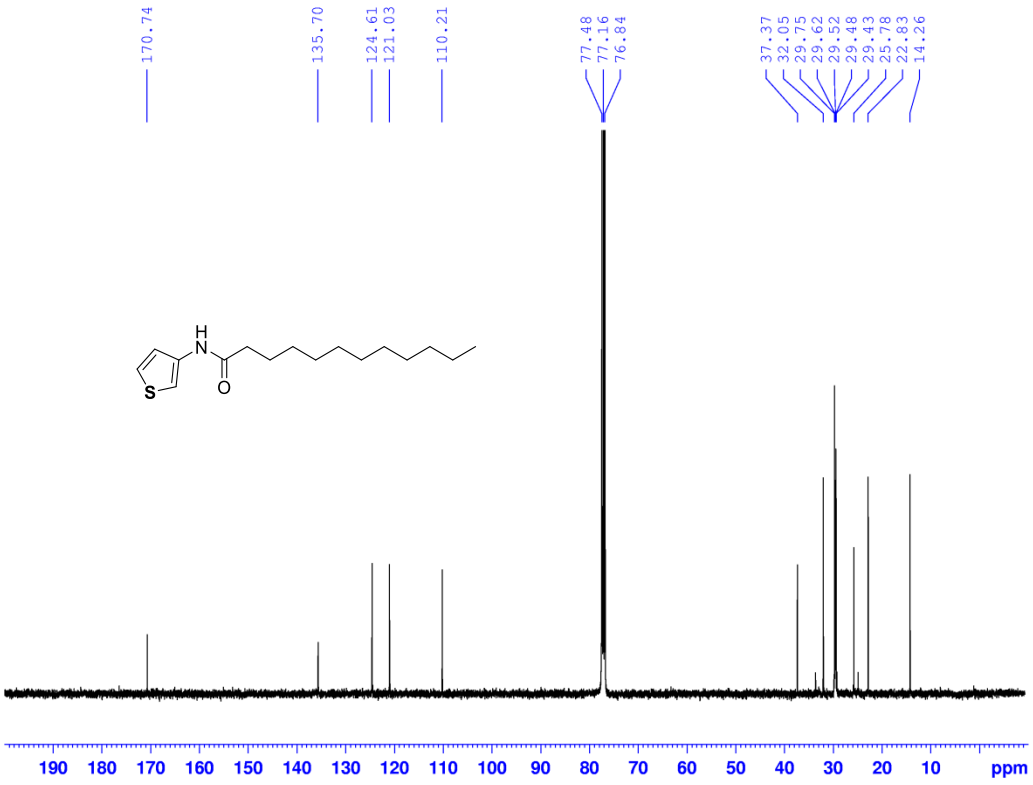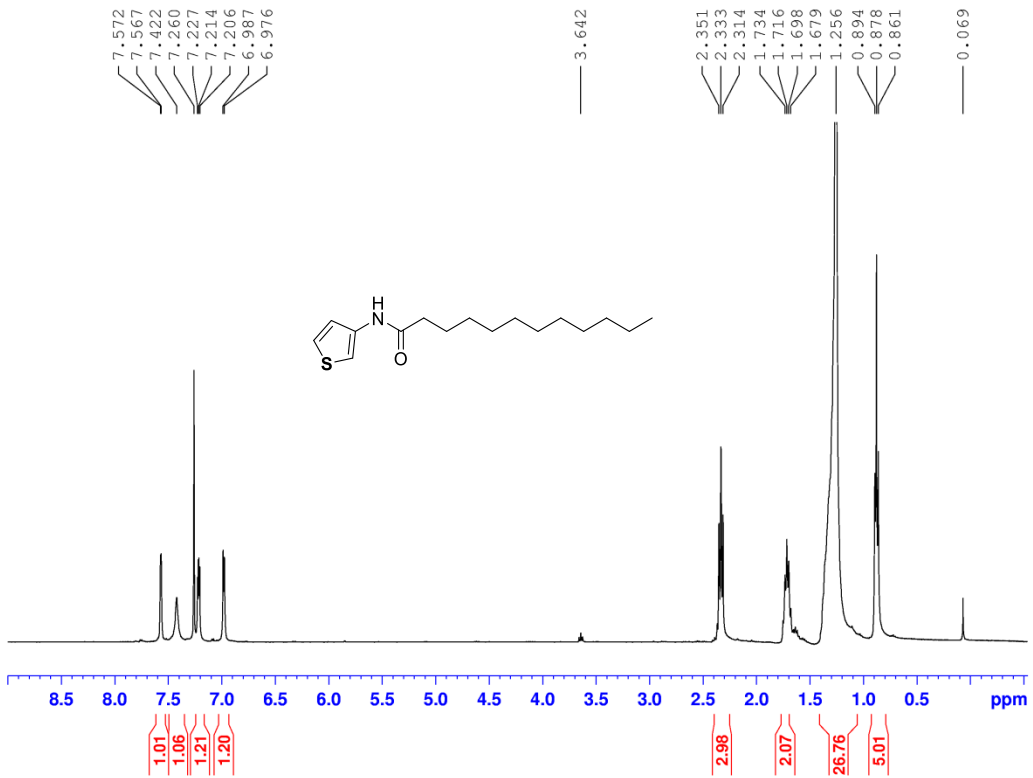

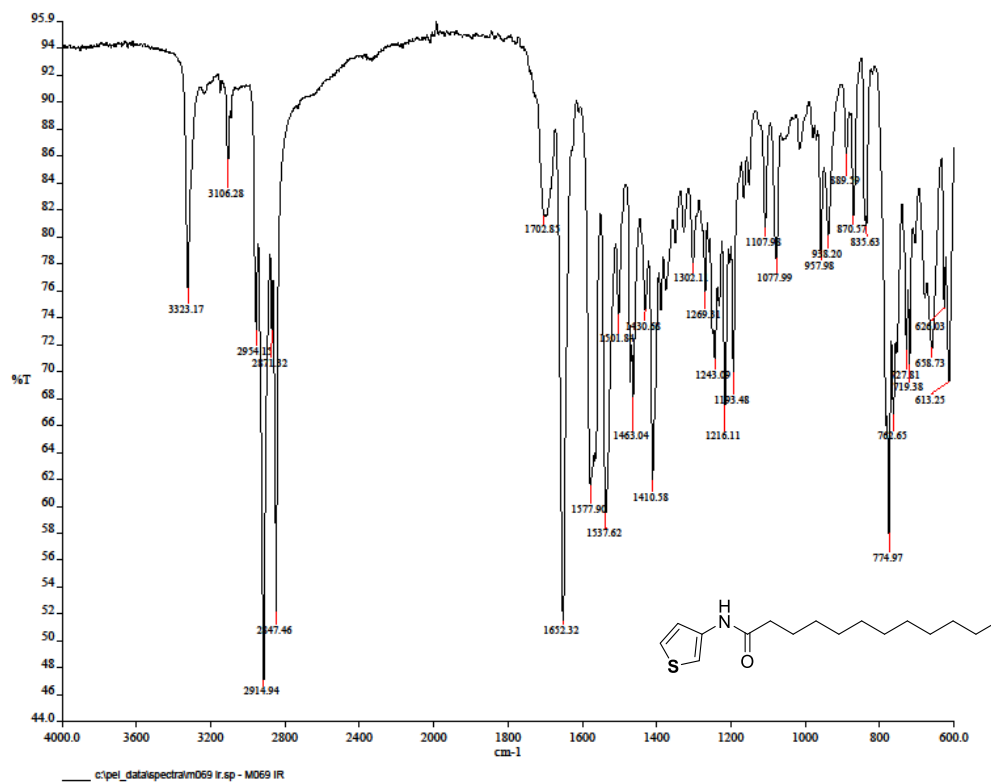



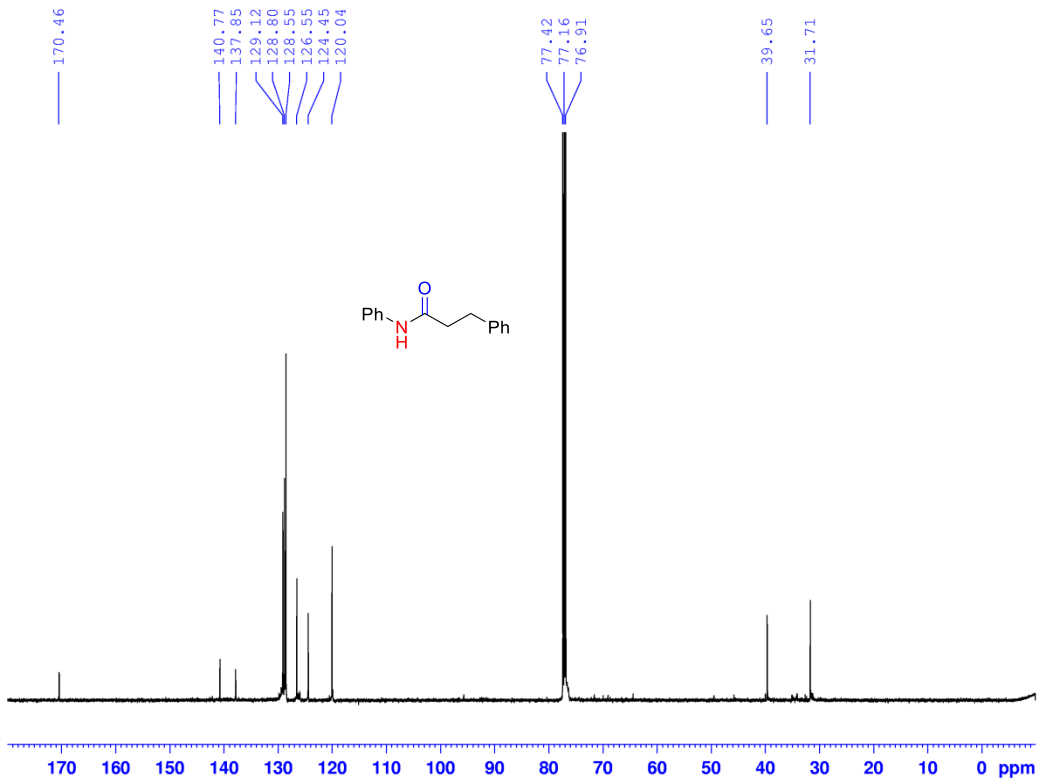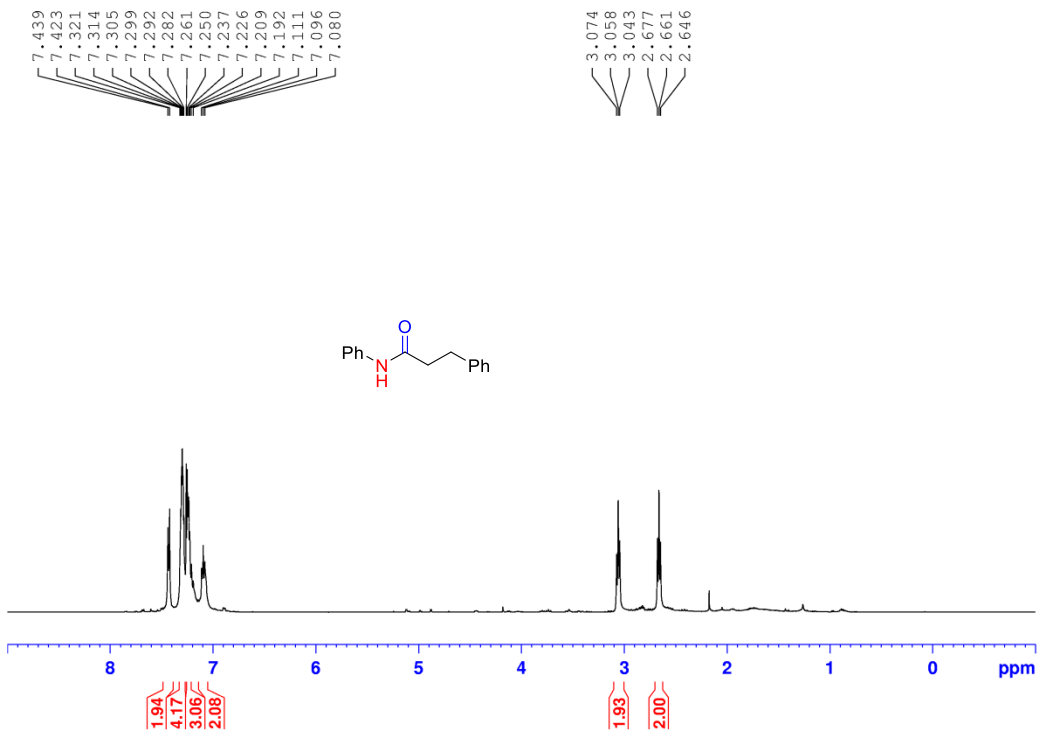

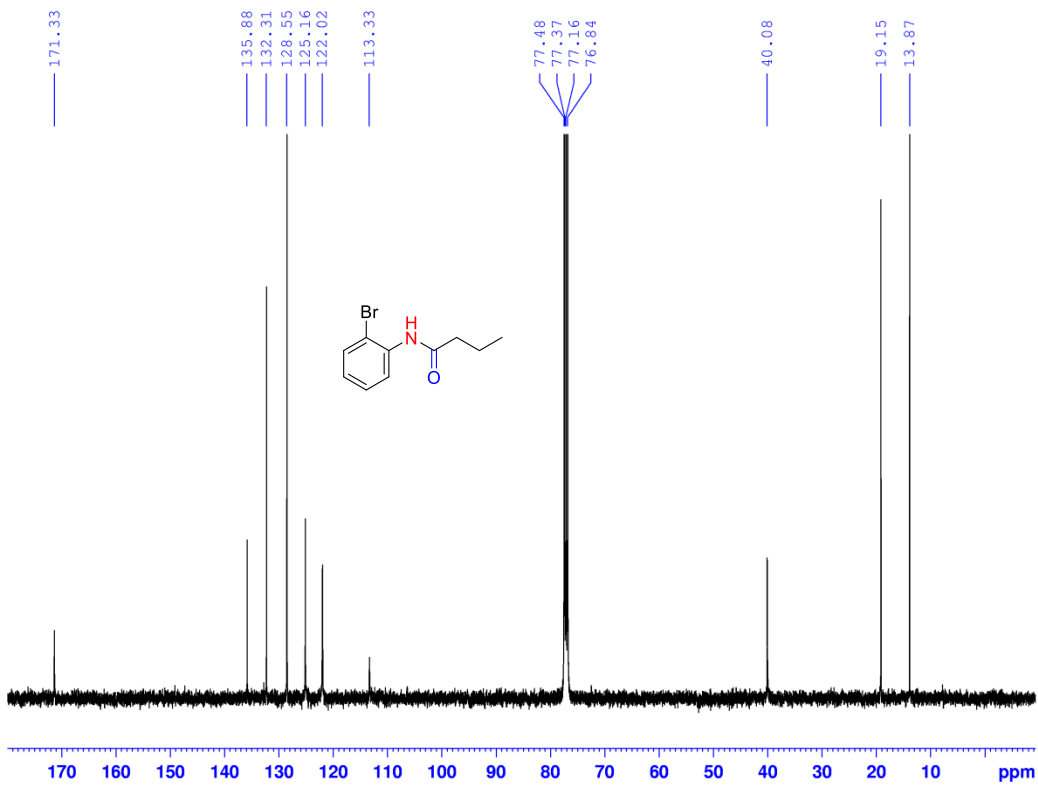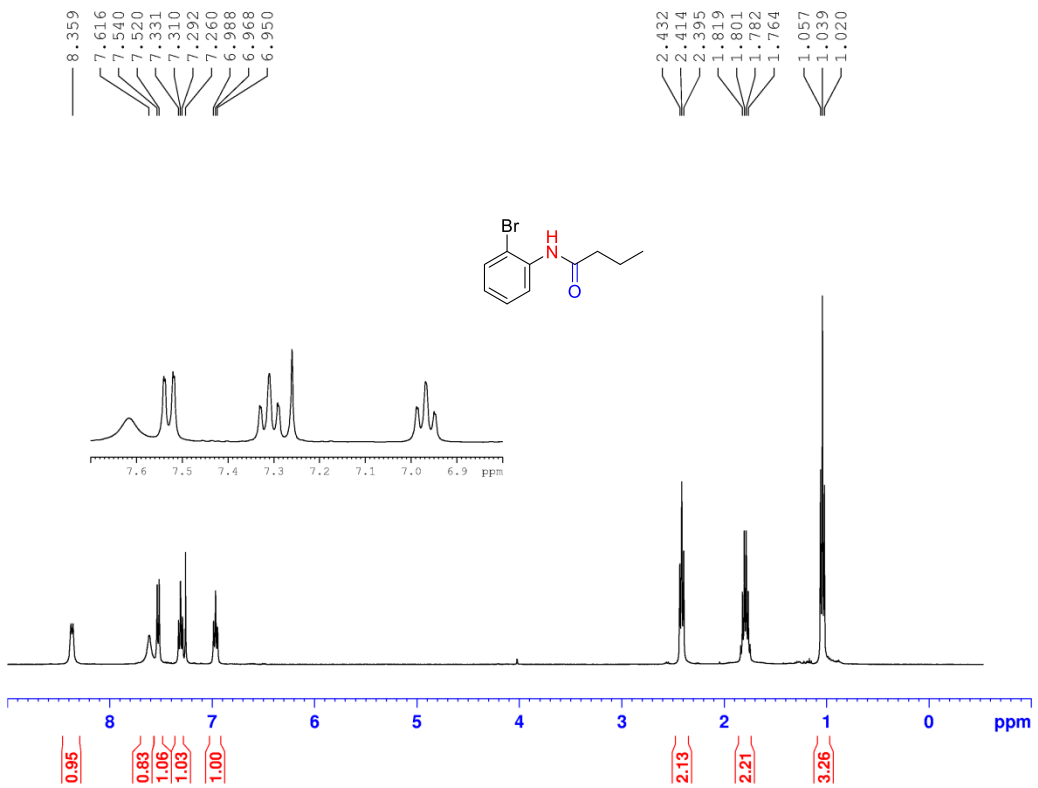

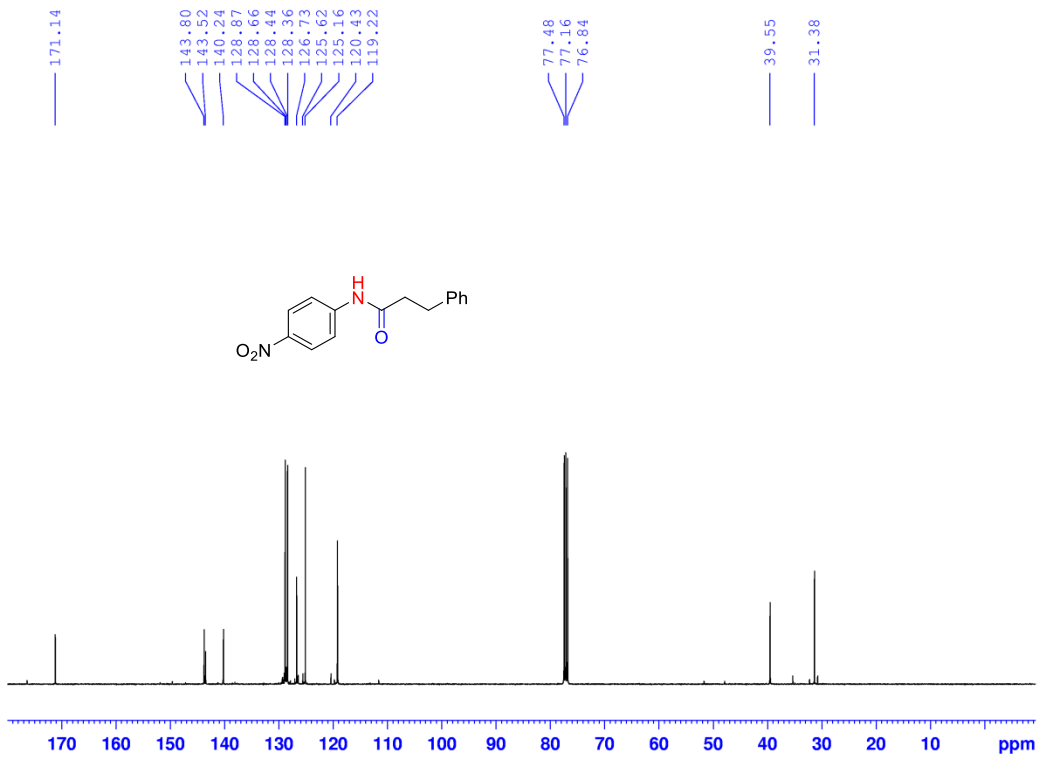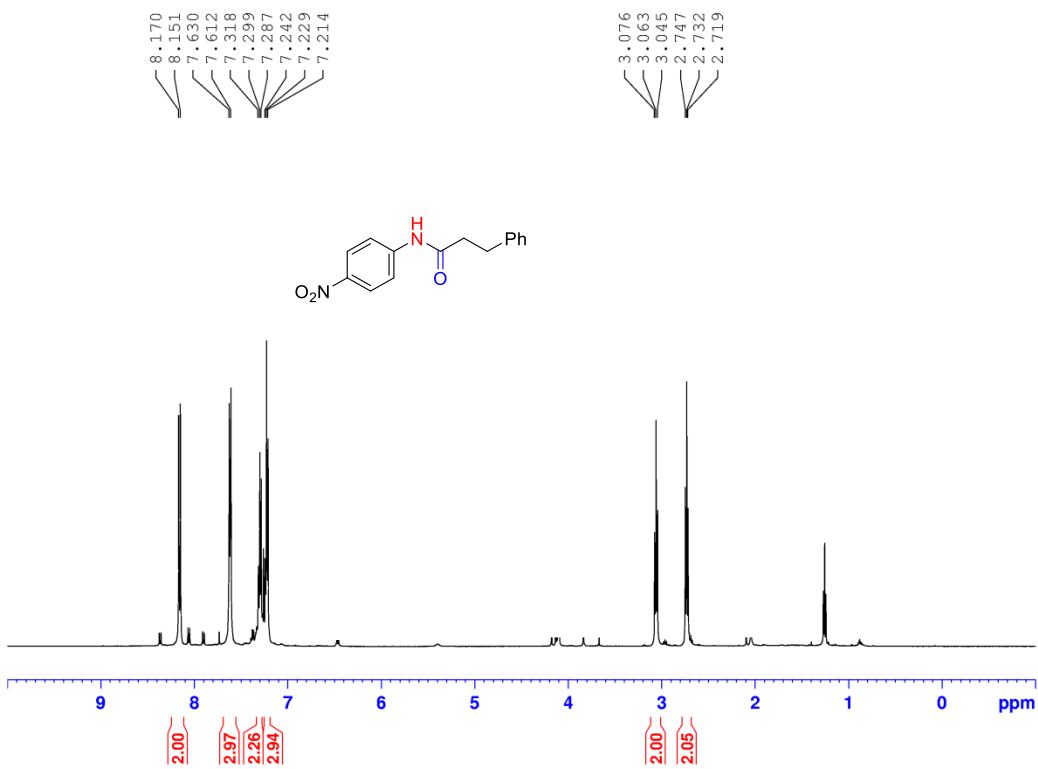

F19 CDCl3

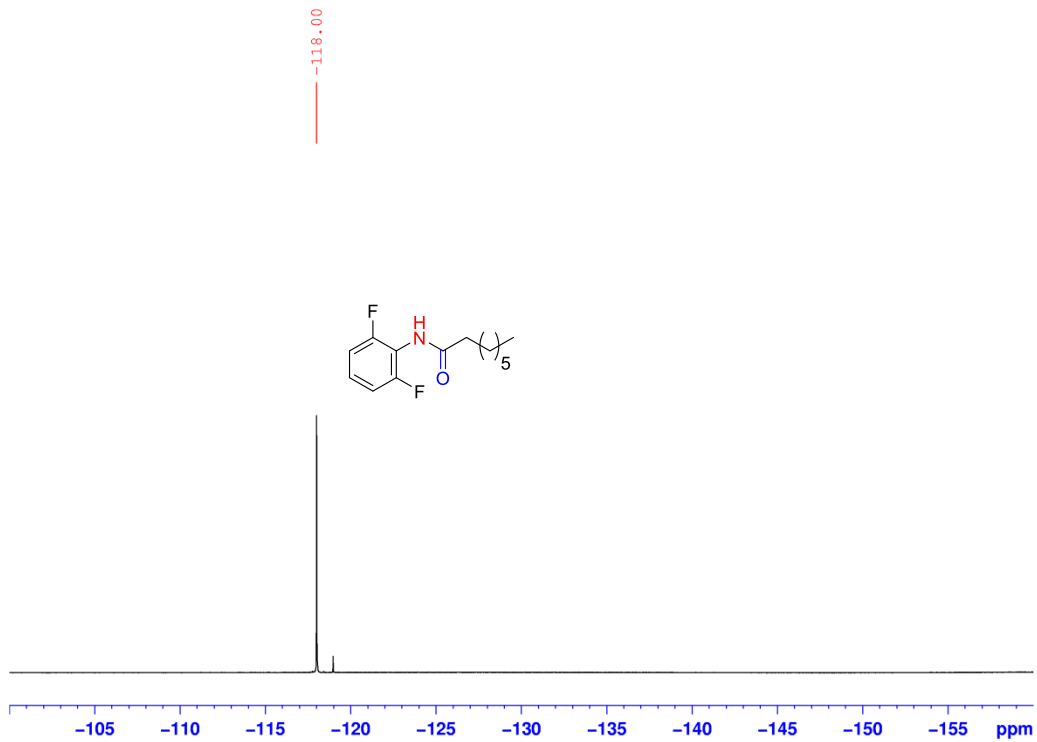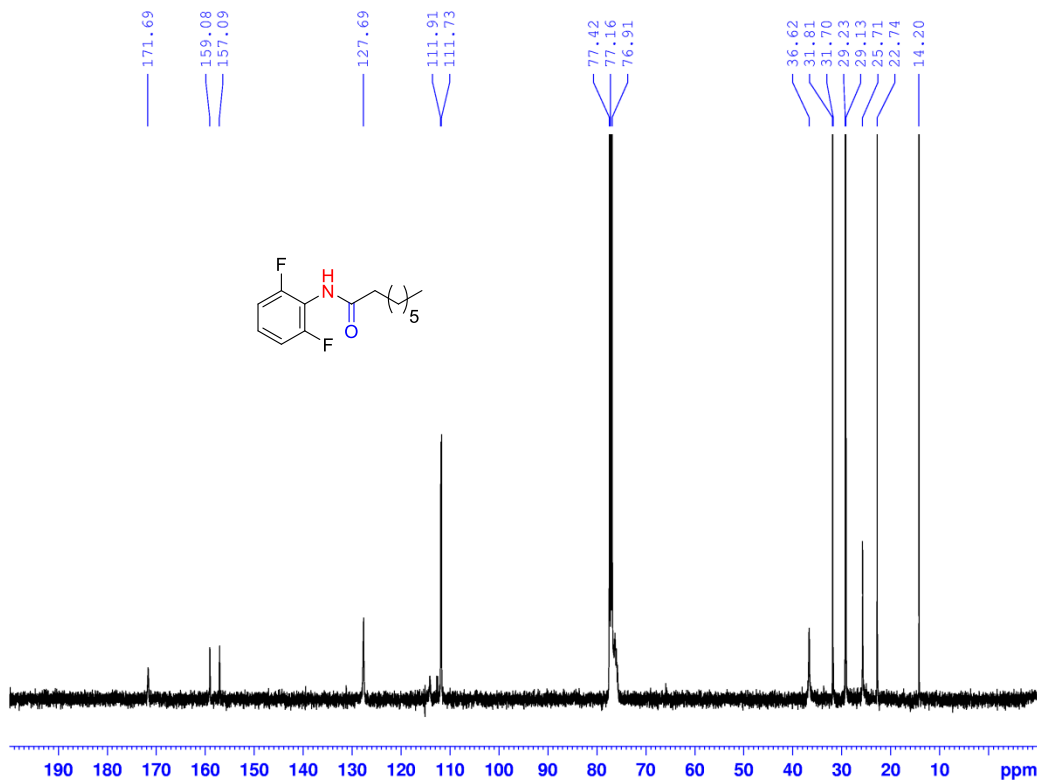

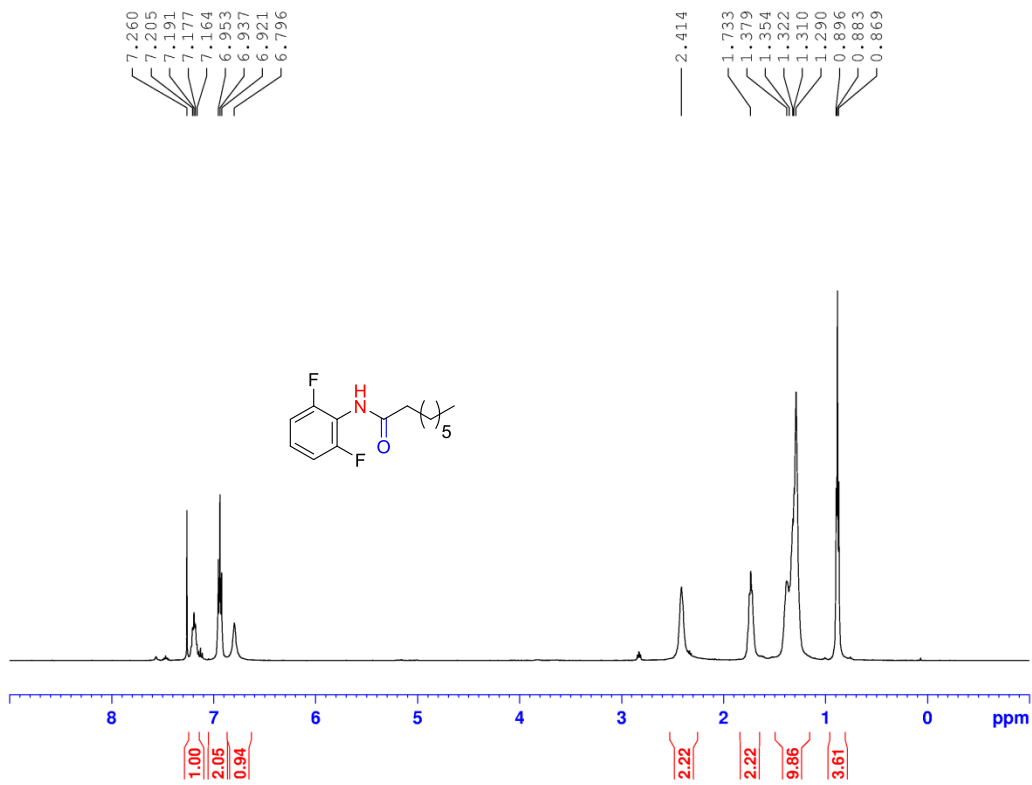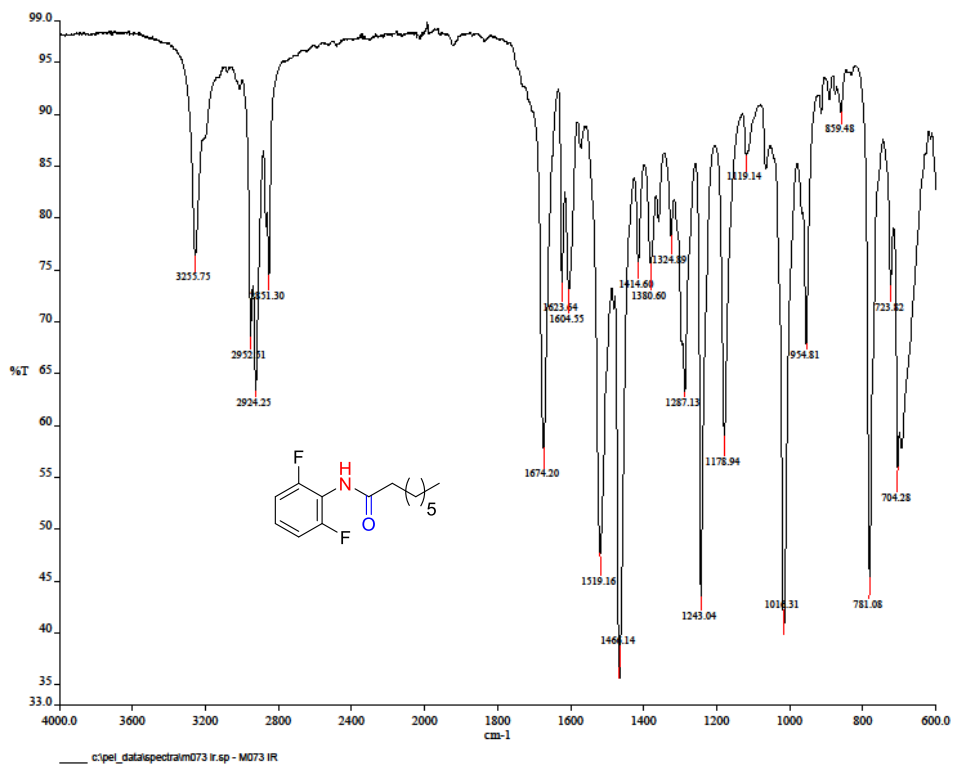

F-NMR L059

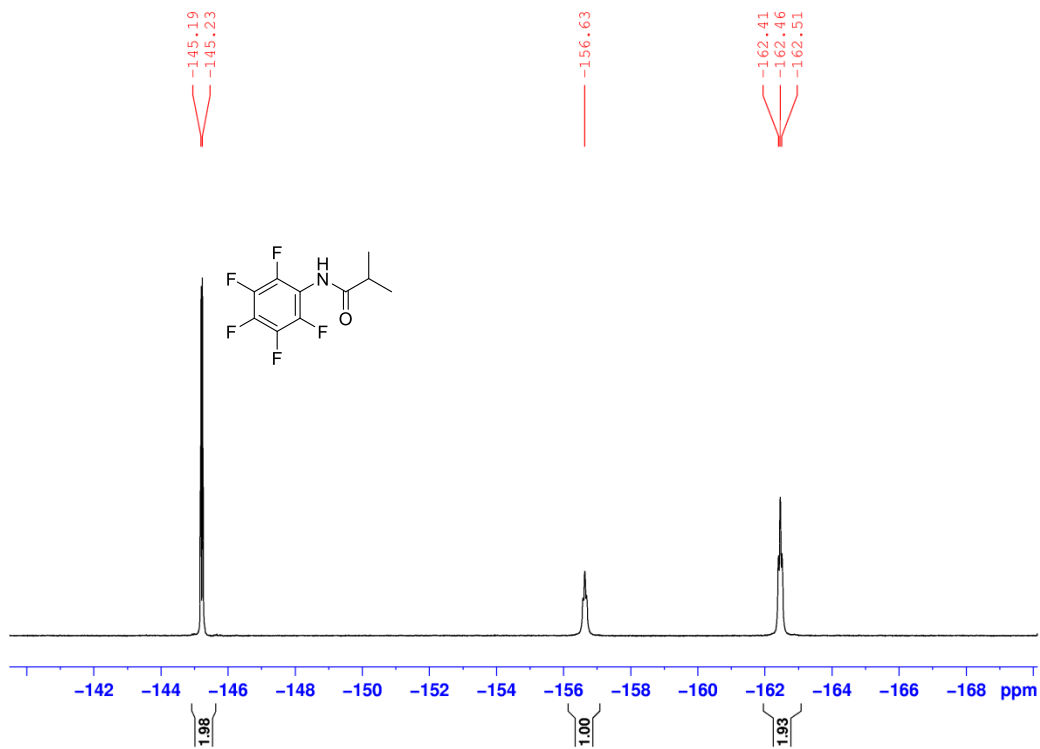

C-NMR L059

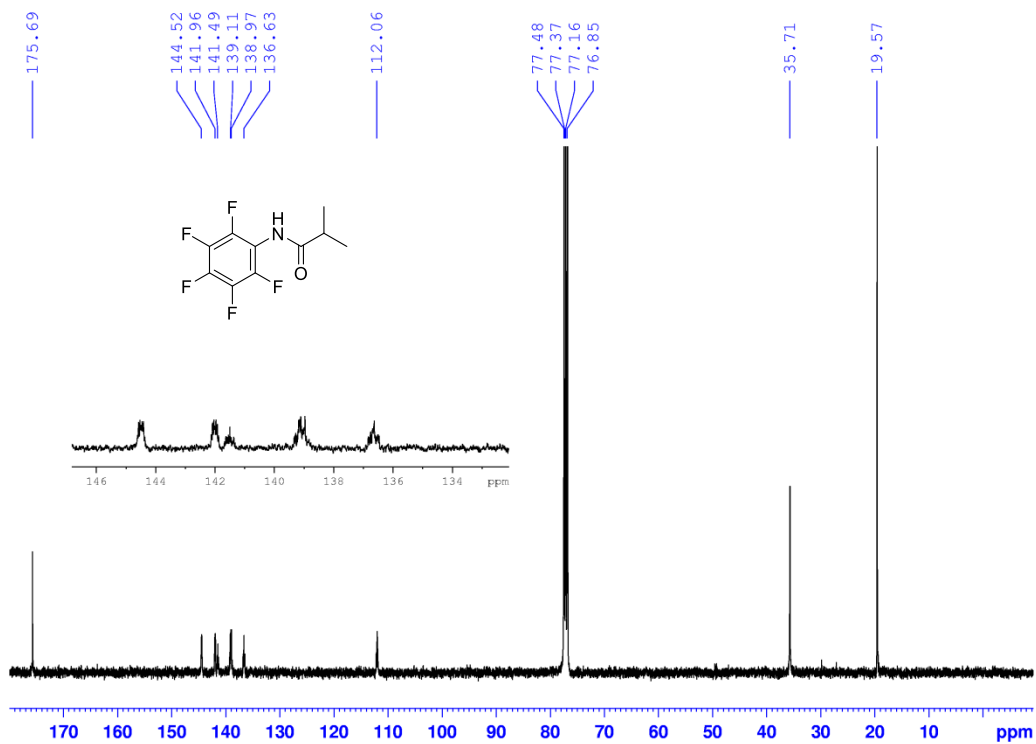

H-NMR L059

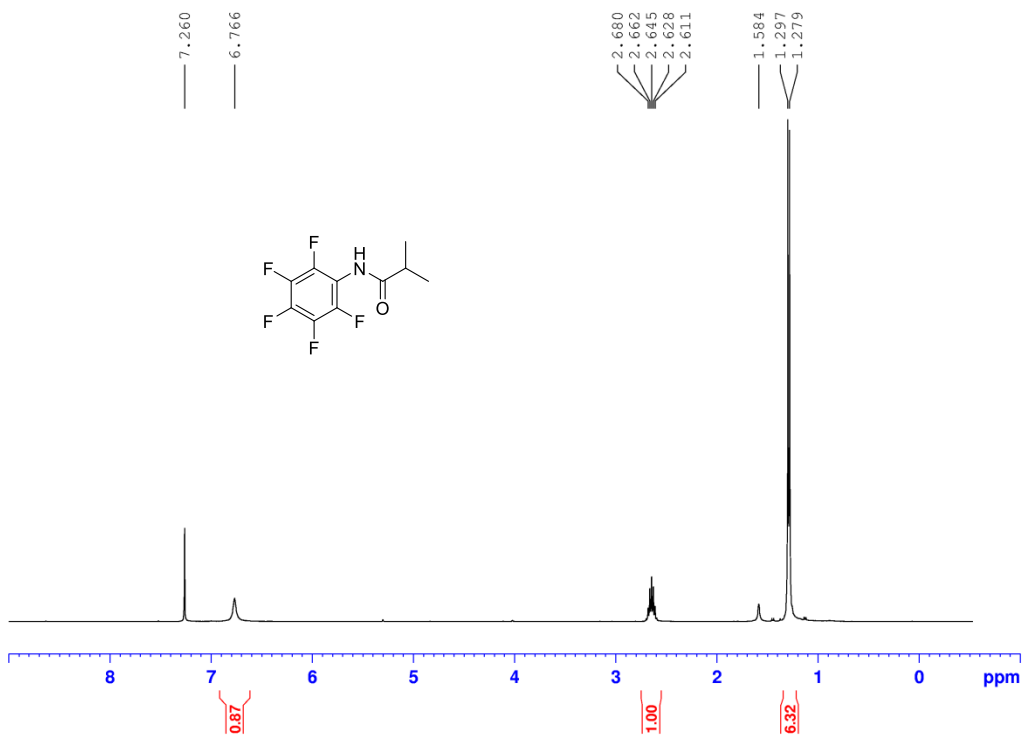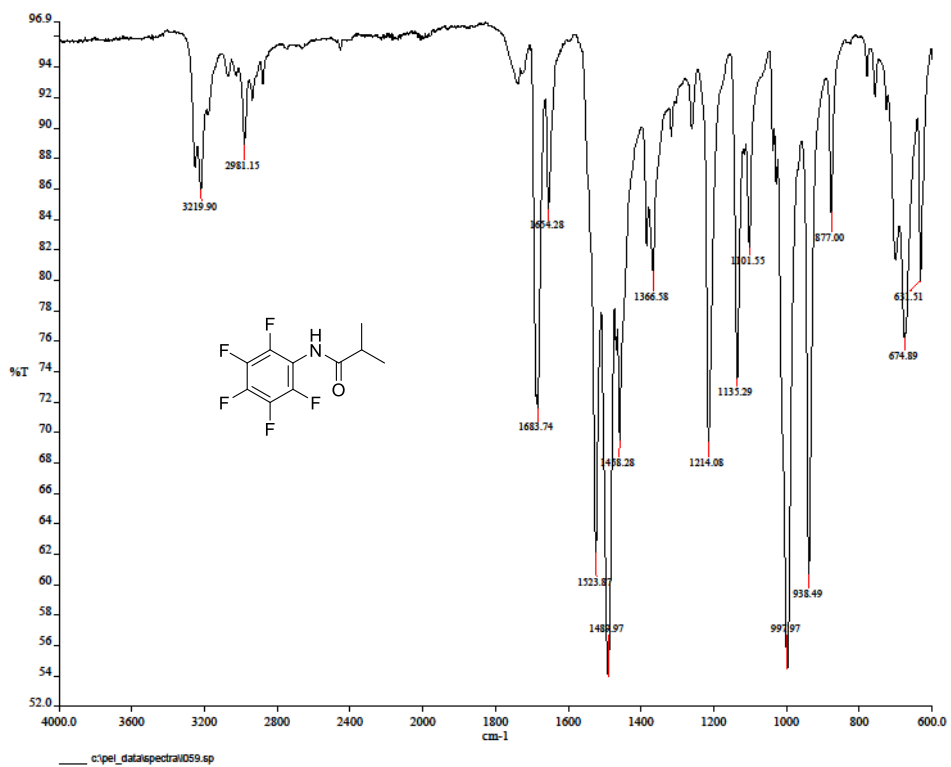

FNMR L047 CDC13 376MHz

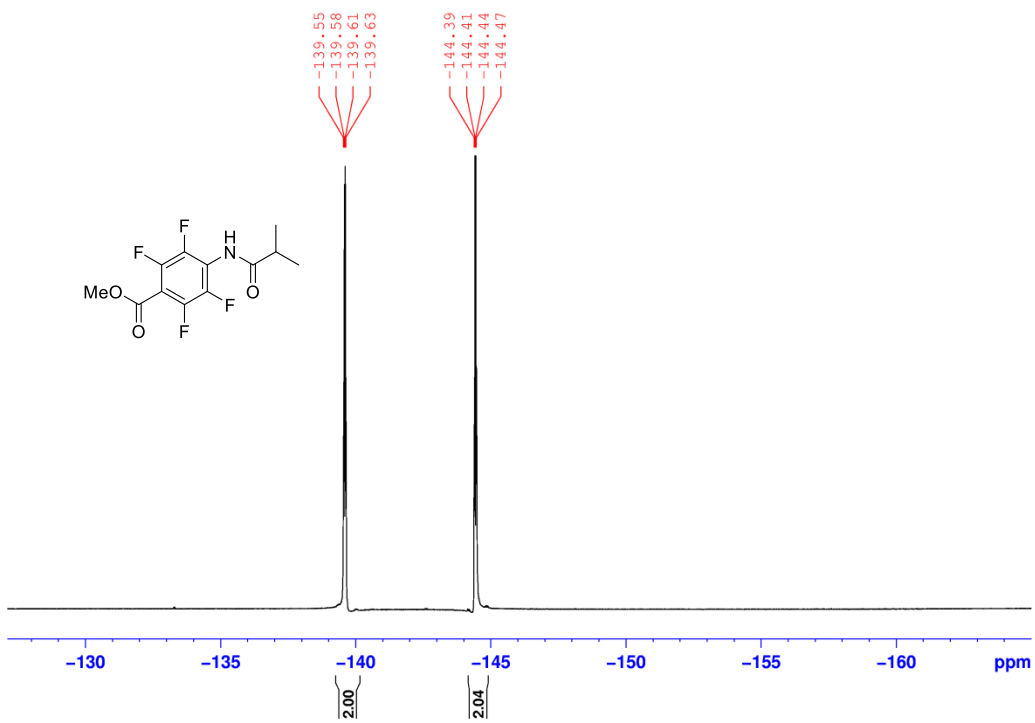

C13 L047 CDC13 100MHz

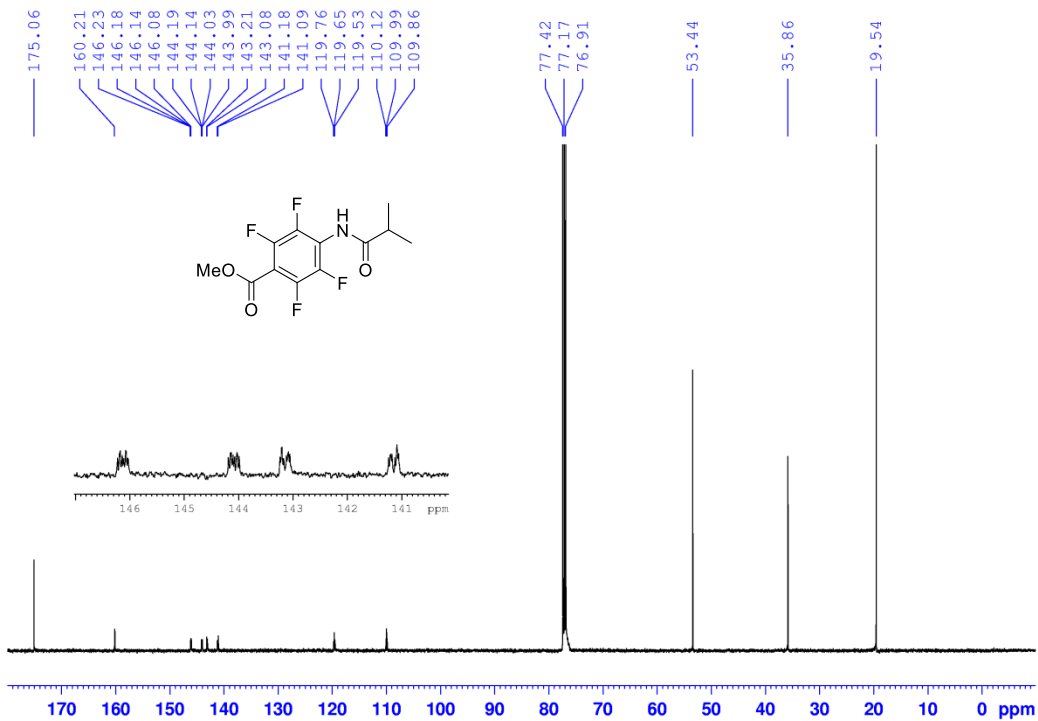



HNMR L047 CDC13

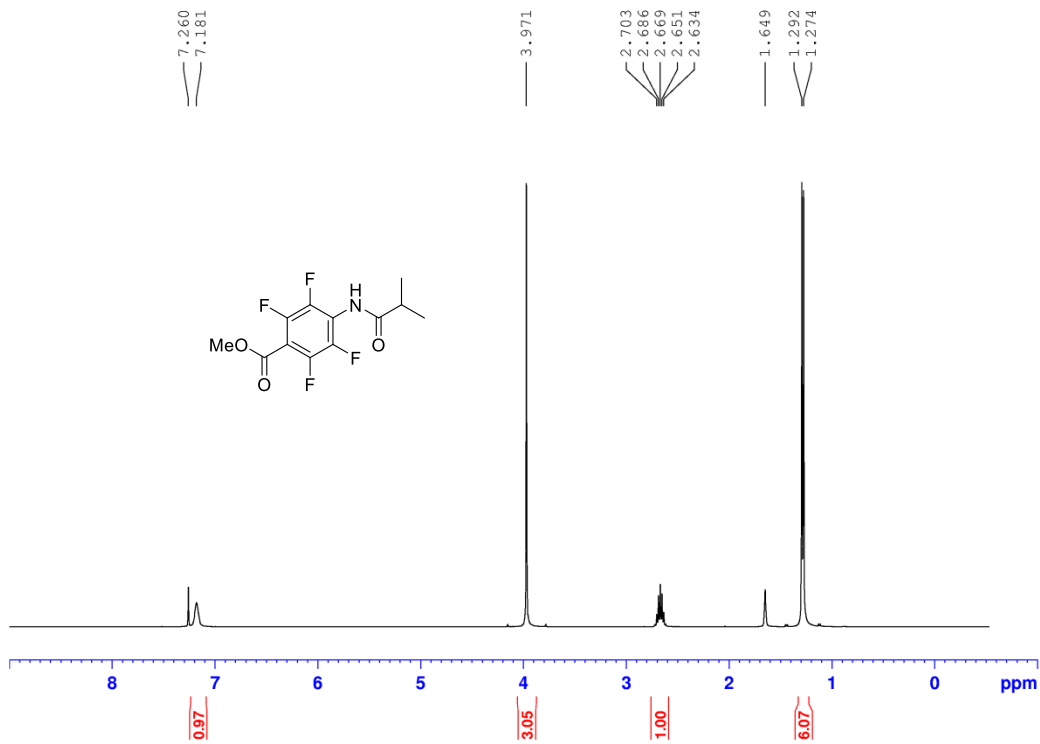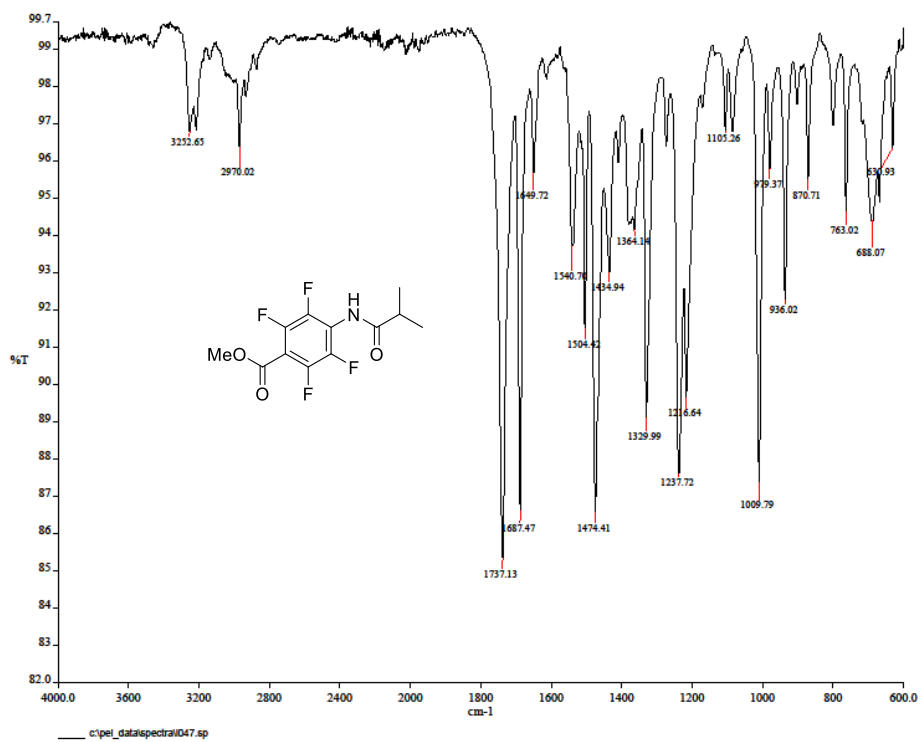

F-NMR L057, without phase procession

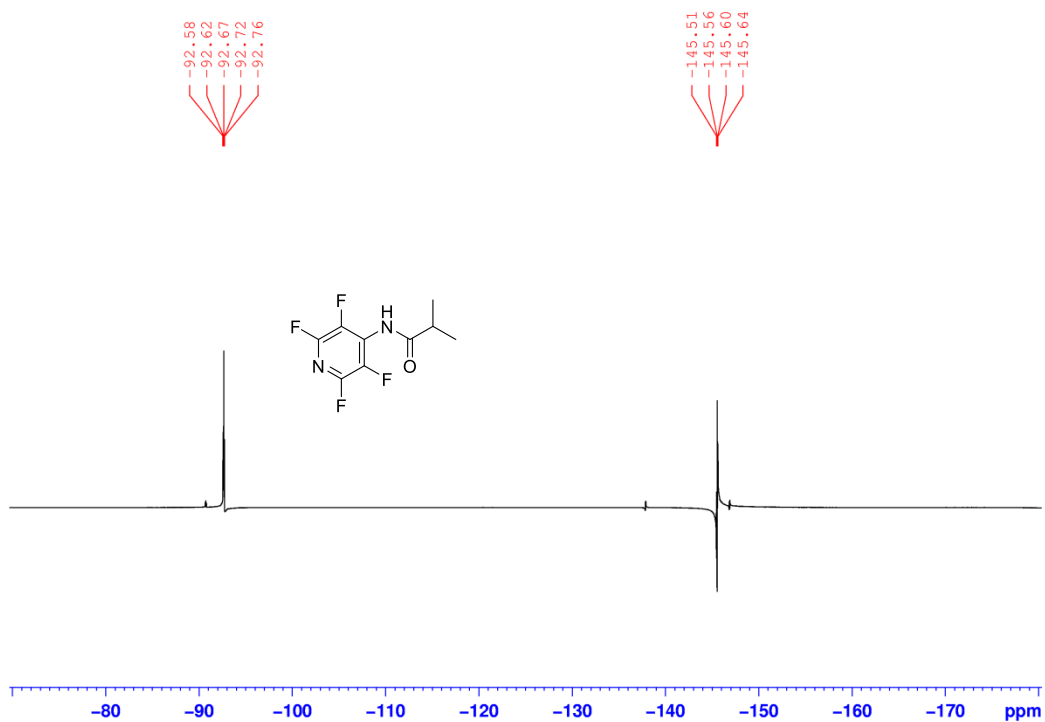

C-NMR L057

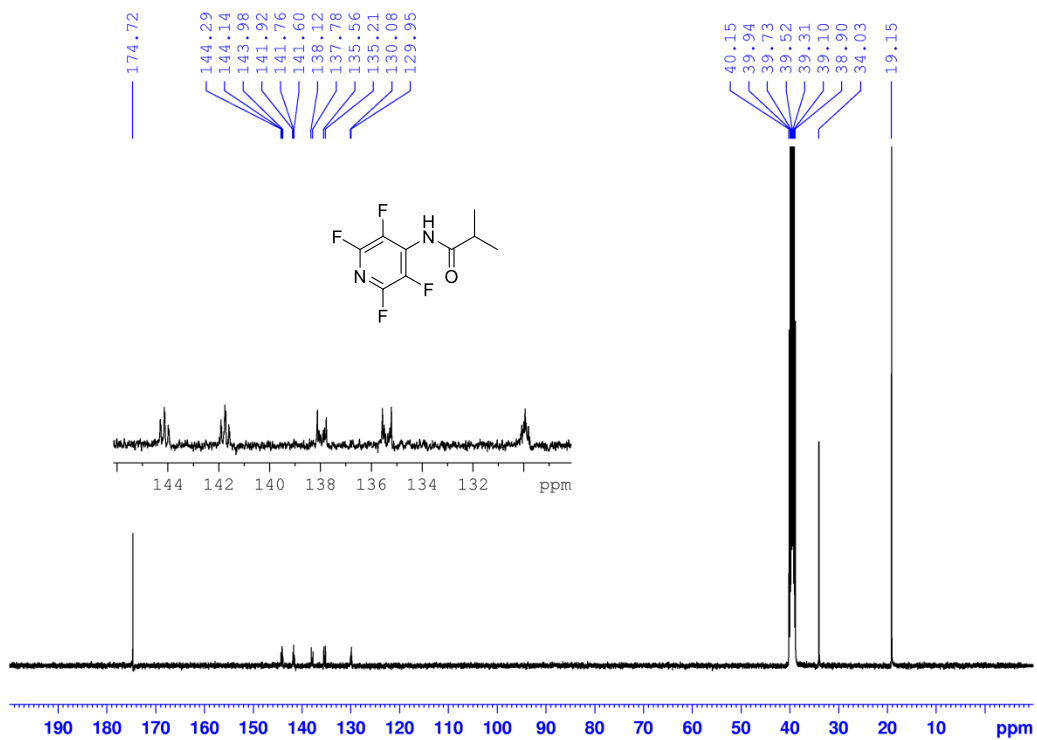

H-NMR L057

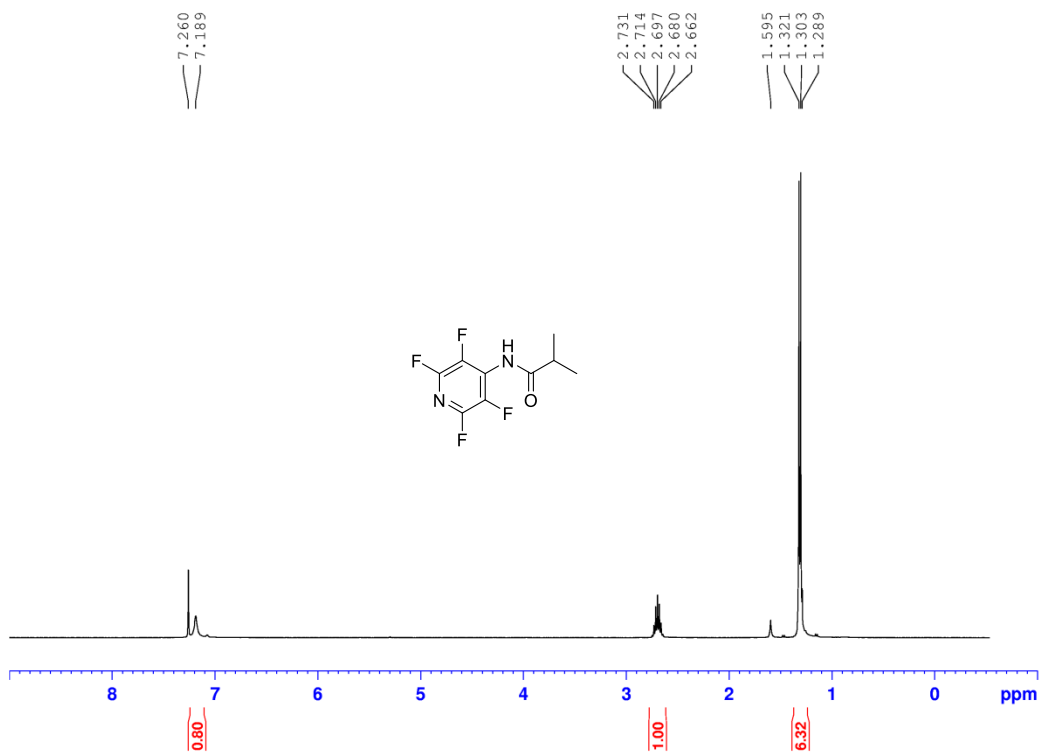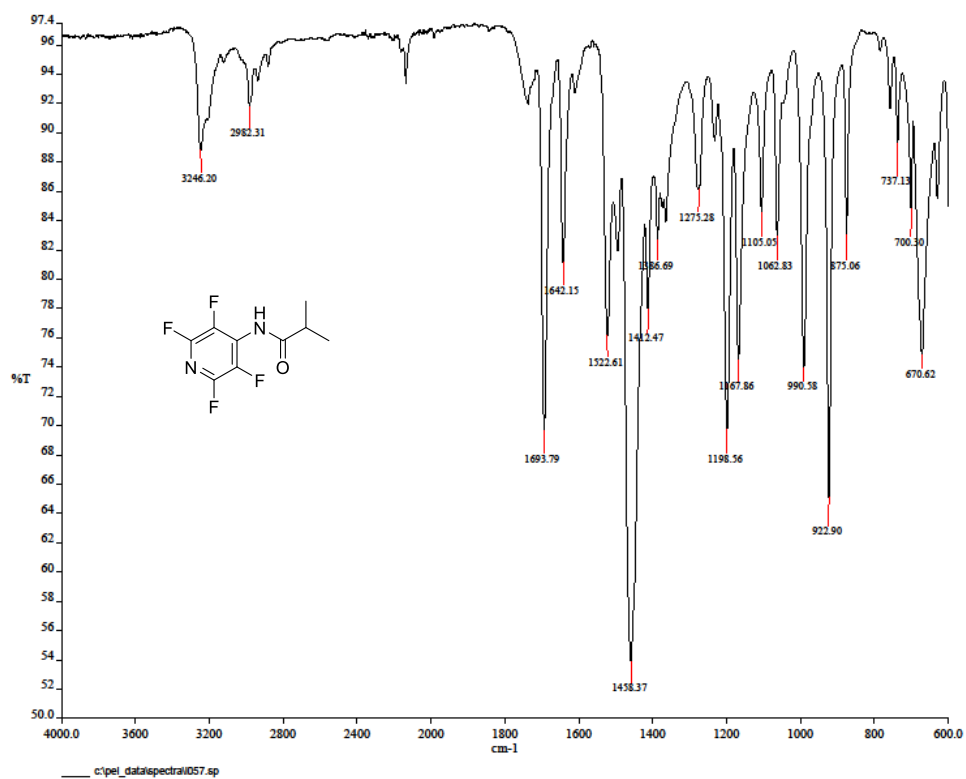

F-NMR L058

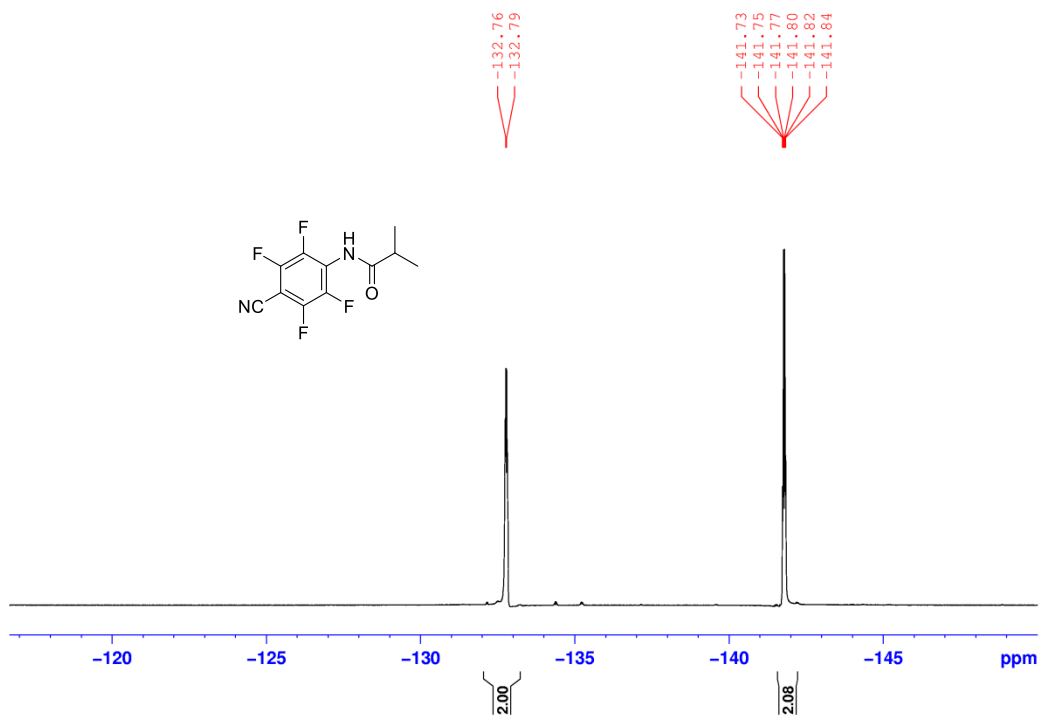

C-NMR L058

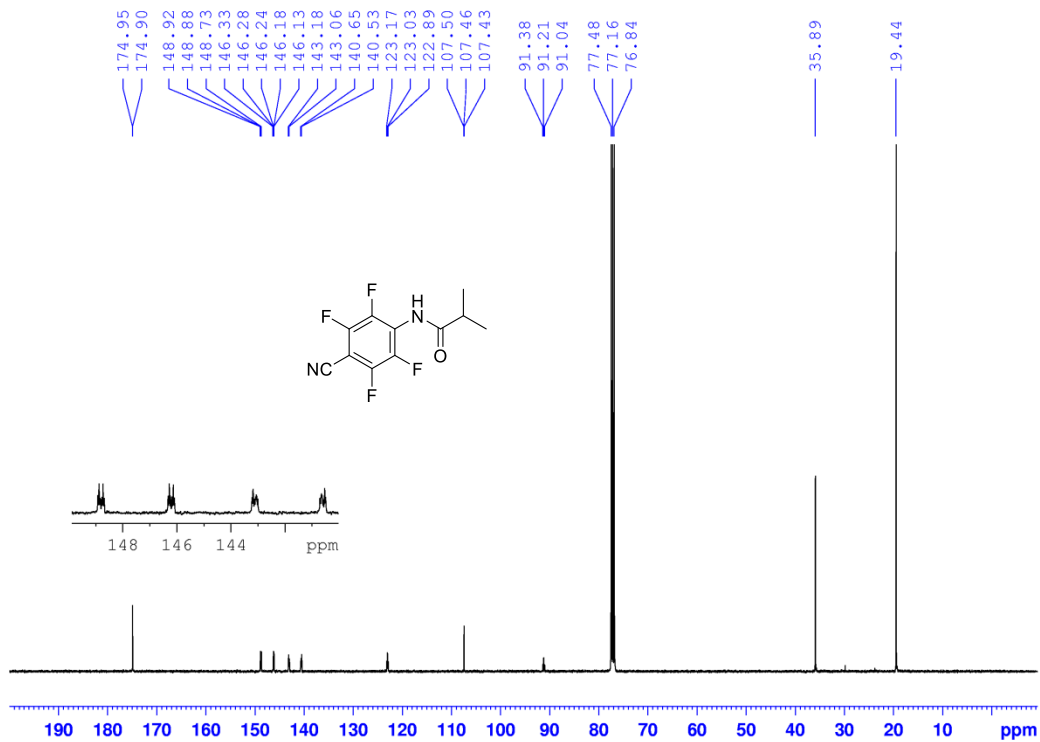

H-NMR L058

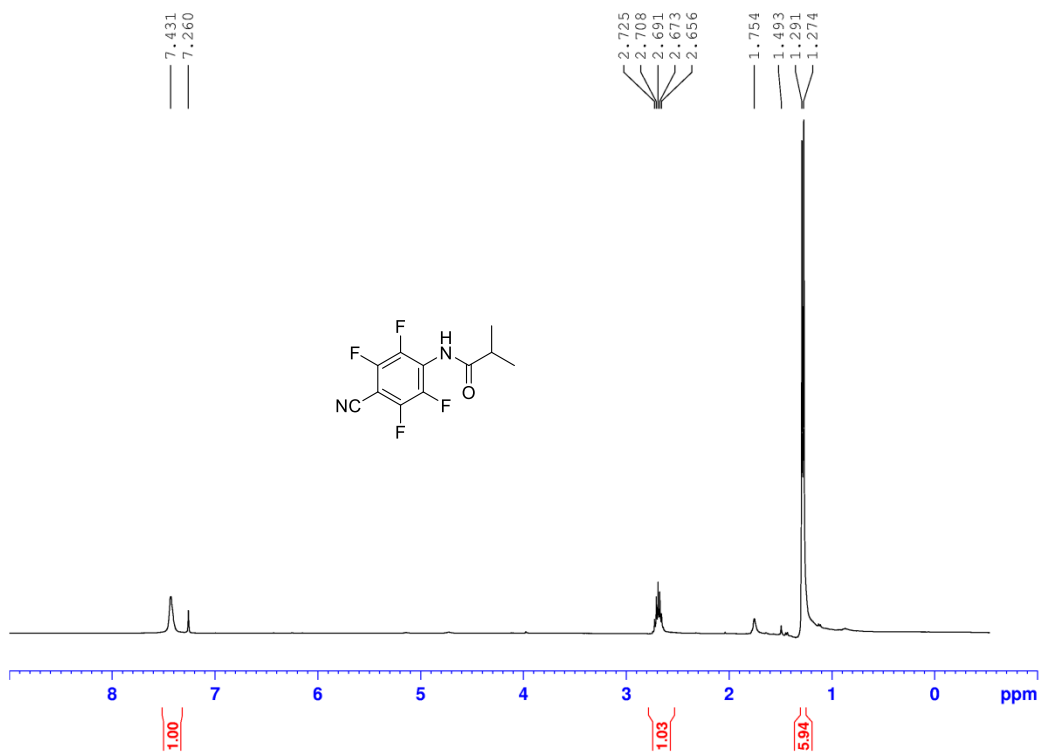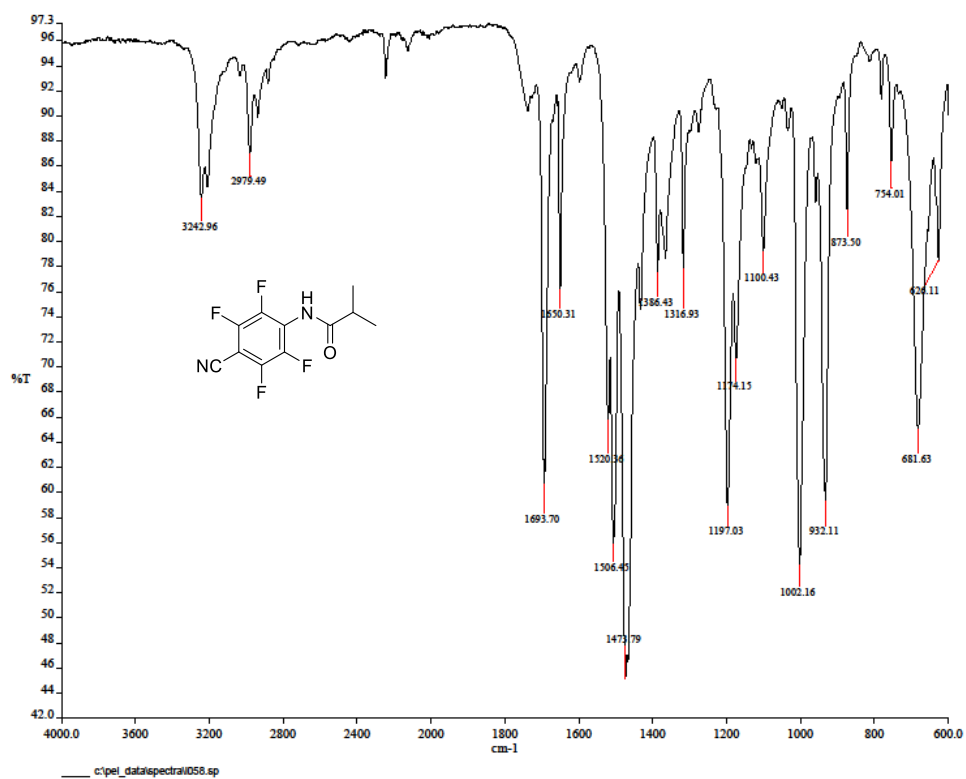

FNMR L082

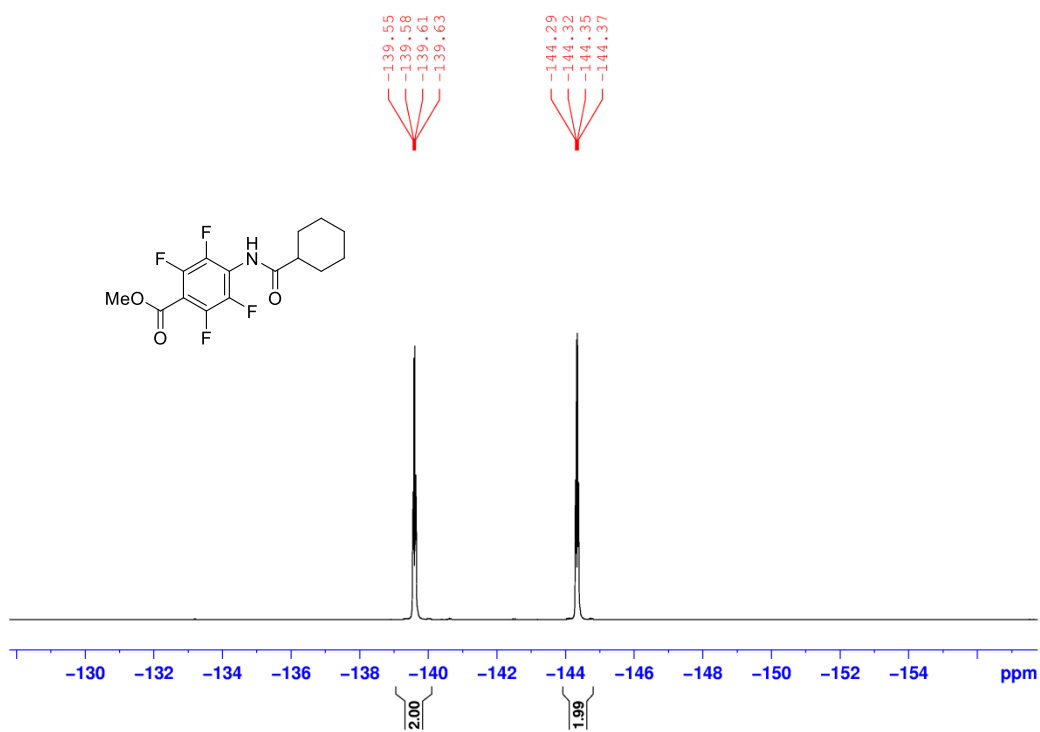

CNMR L081

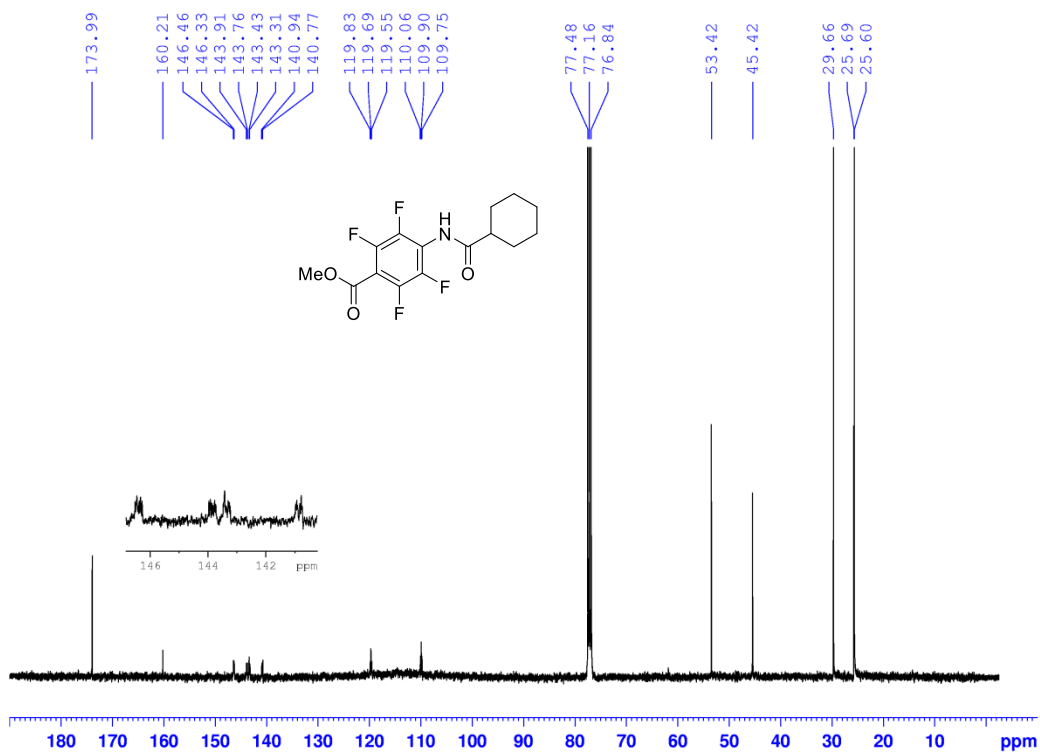

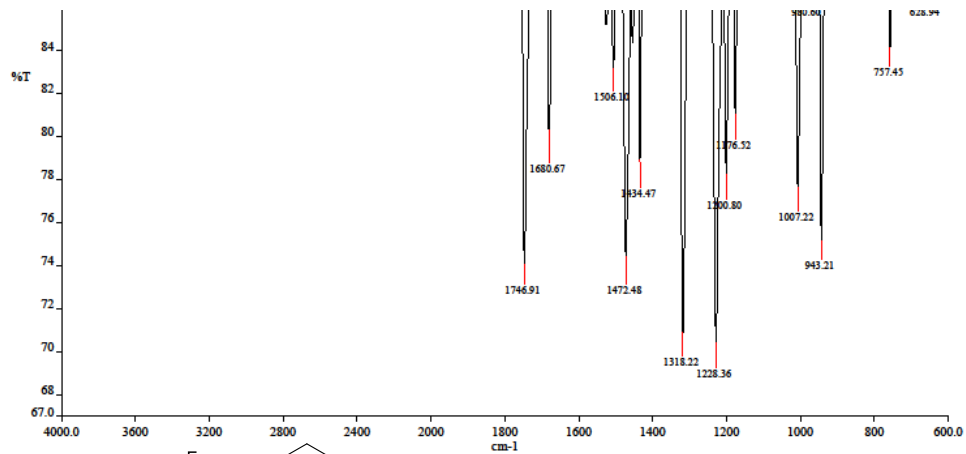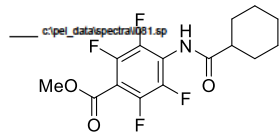

HNMR L081

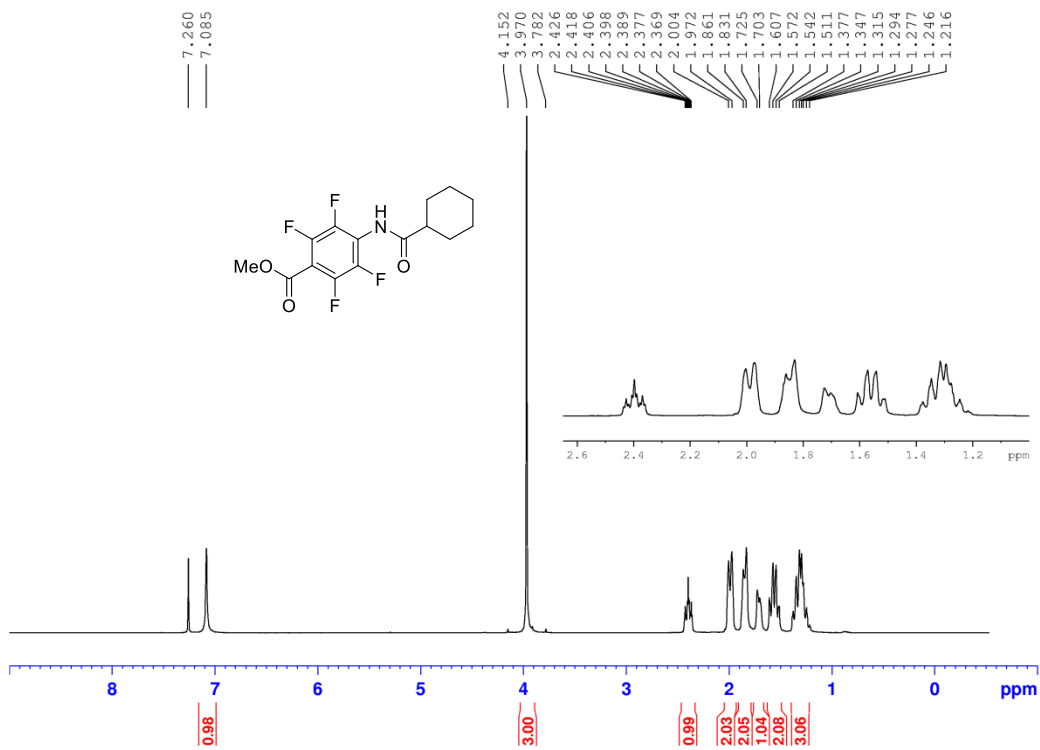

F-NMR L049 CDC13

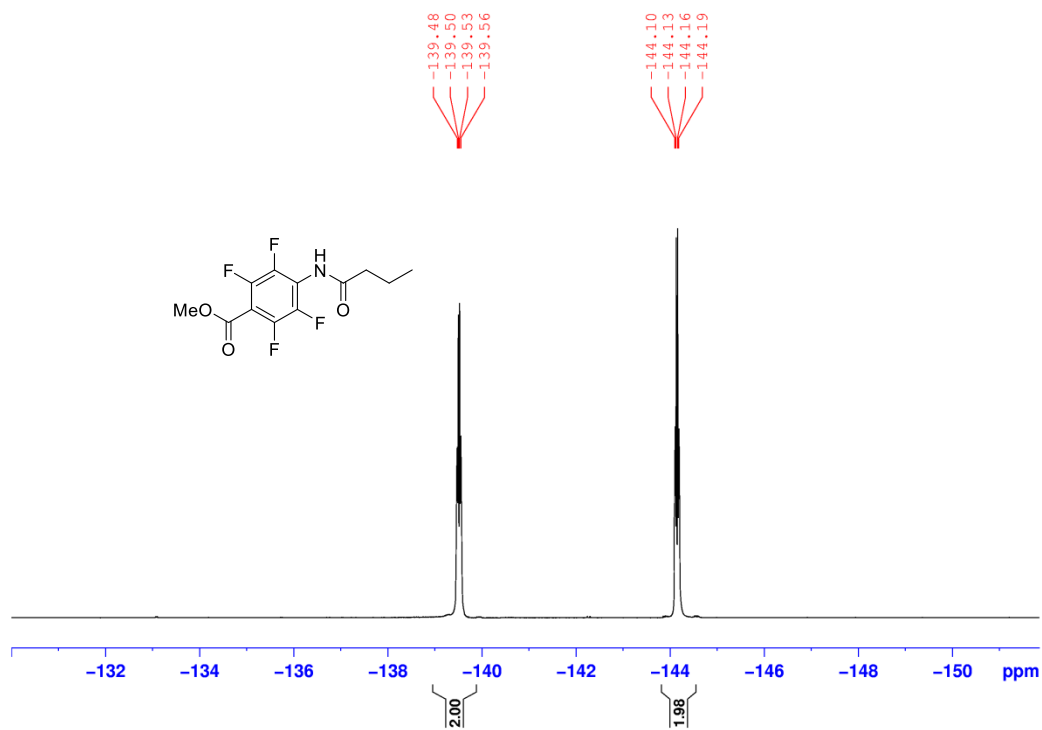

C13-NMR L049 CDC13 100MHz

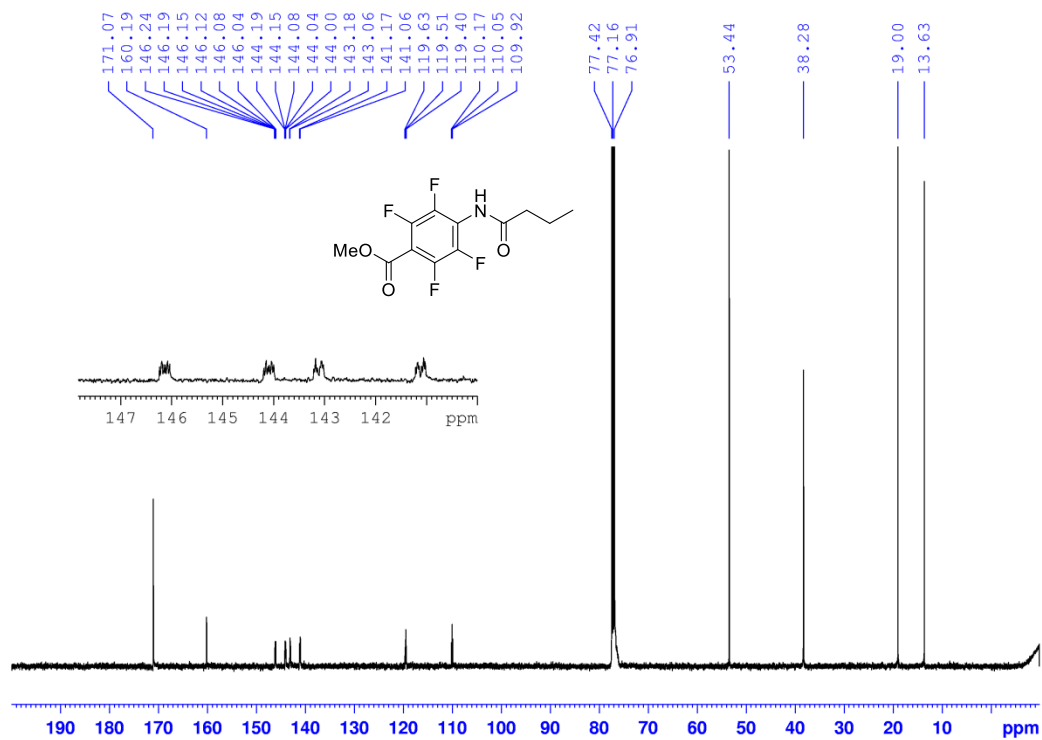



H-NMR L049 CDC13 400MHz

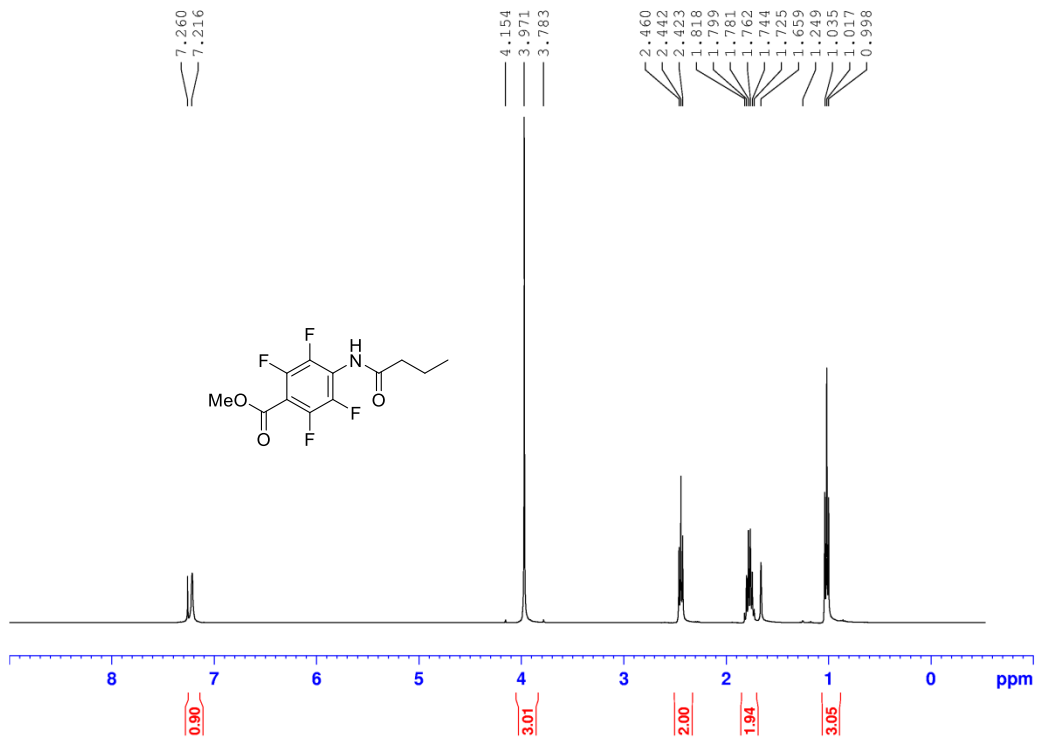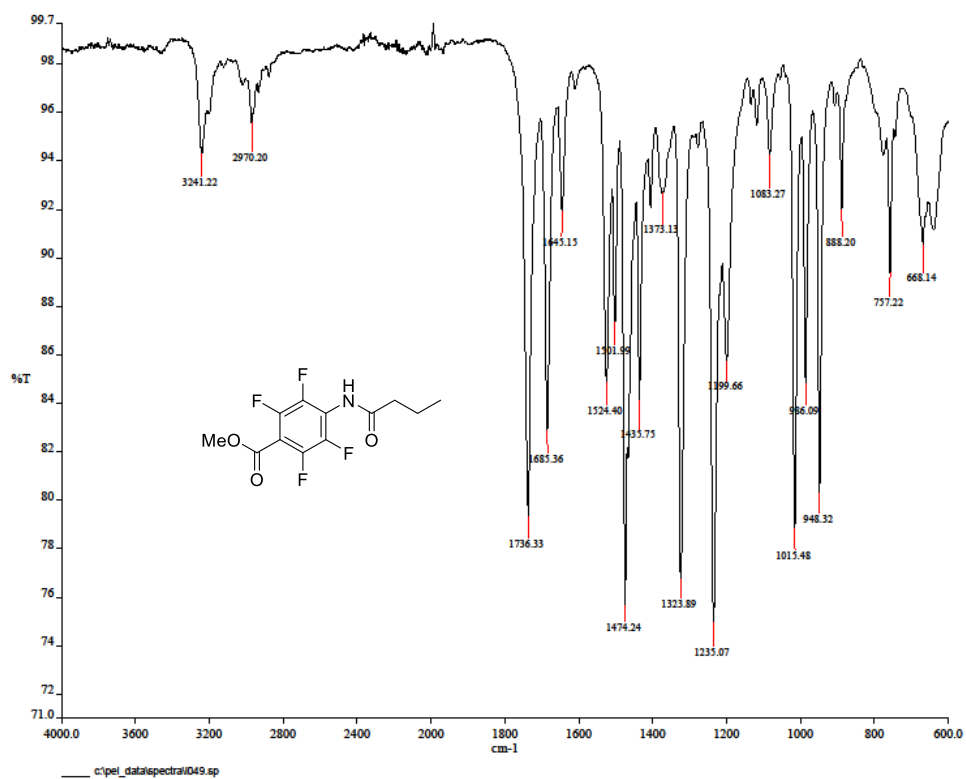

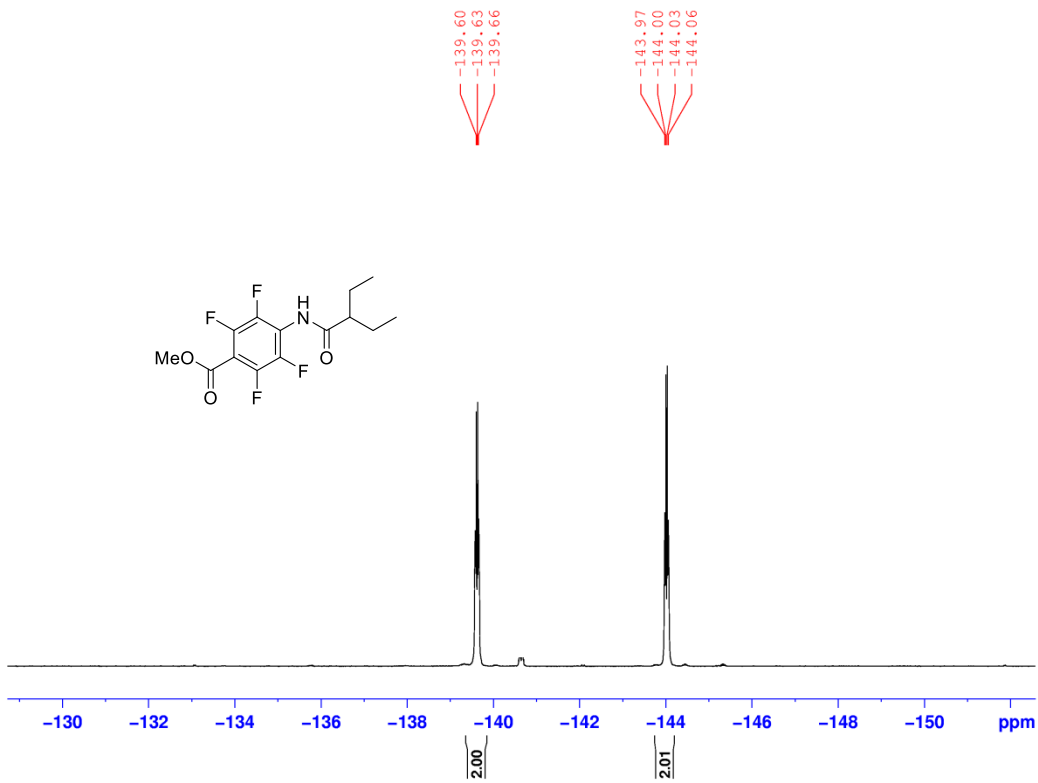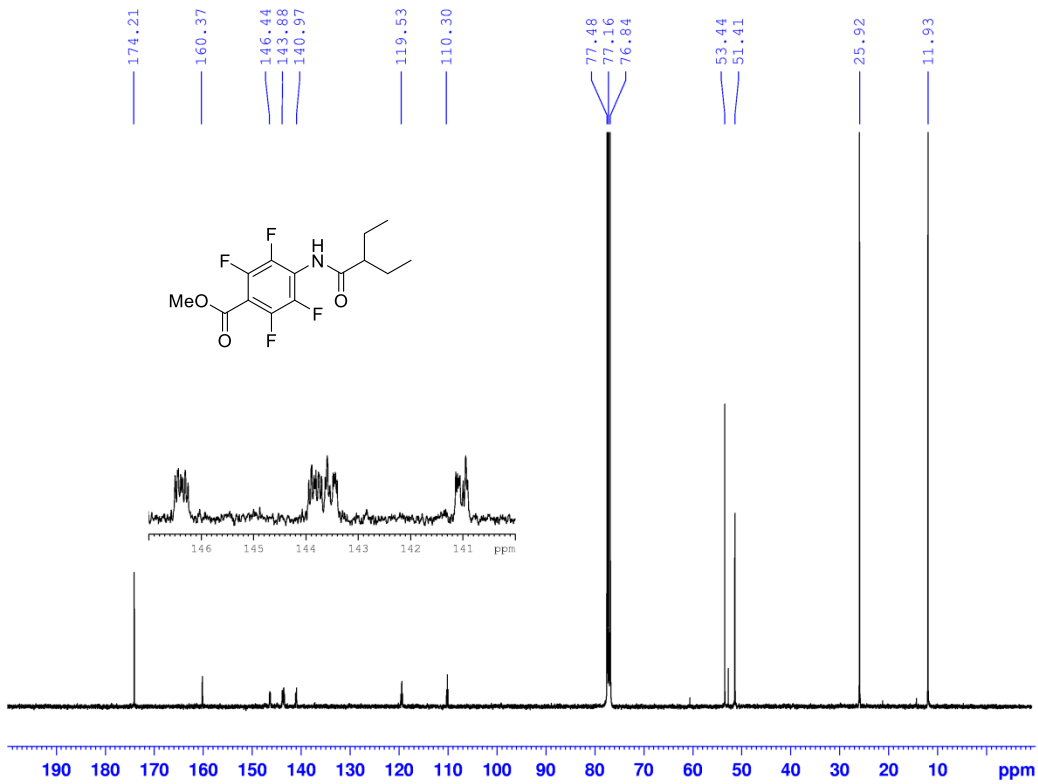

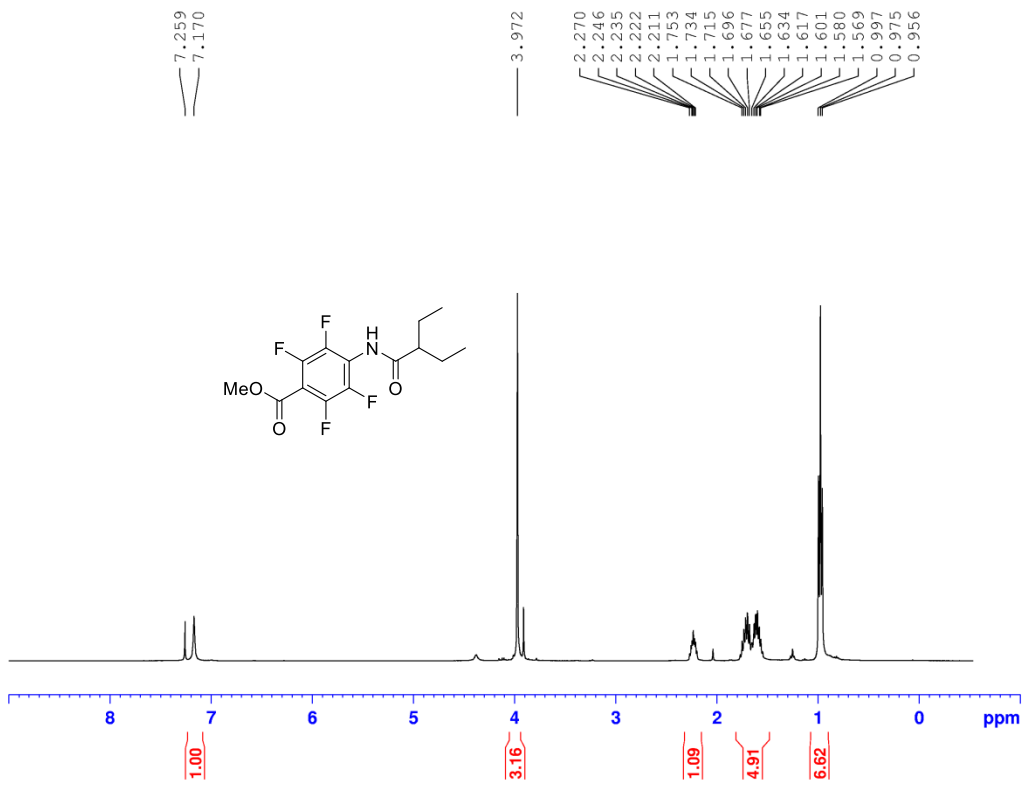

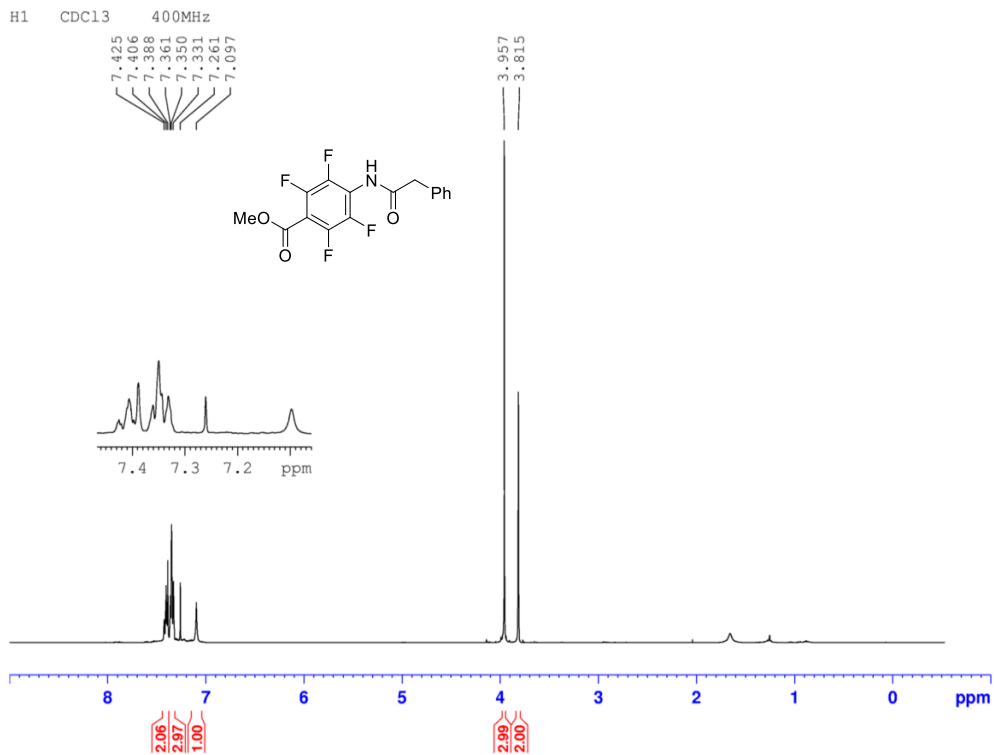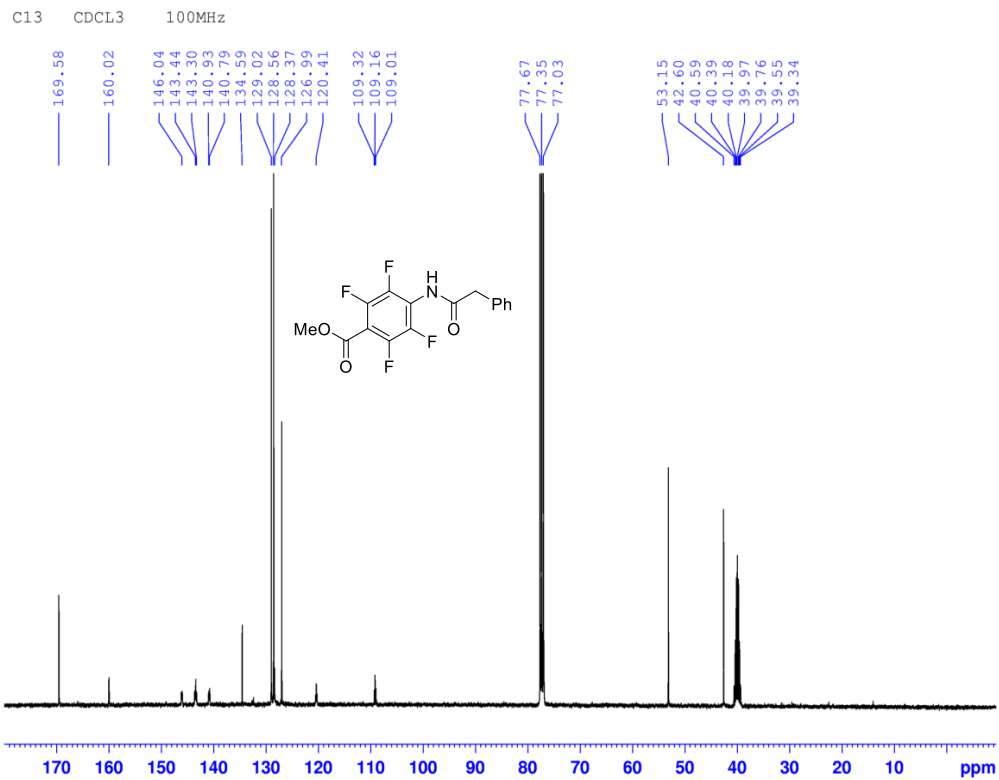

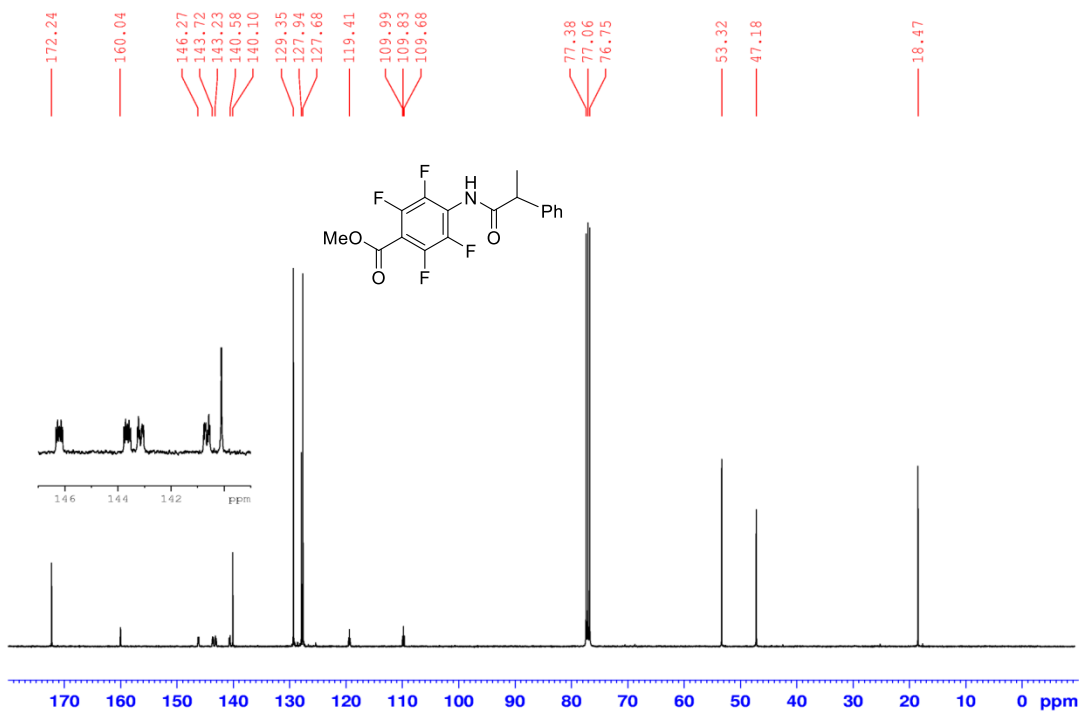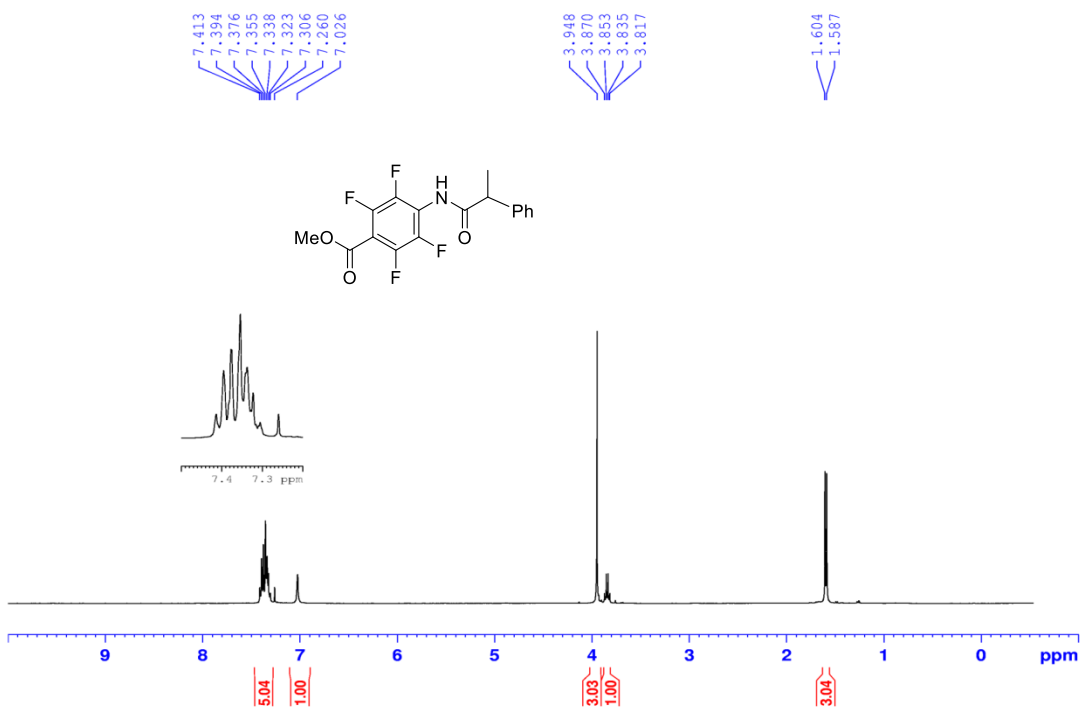

L001B

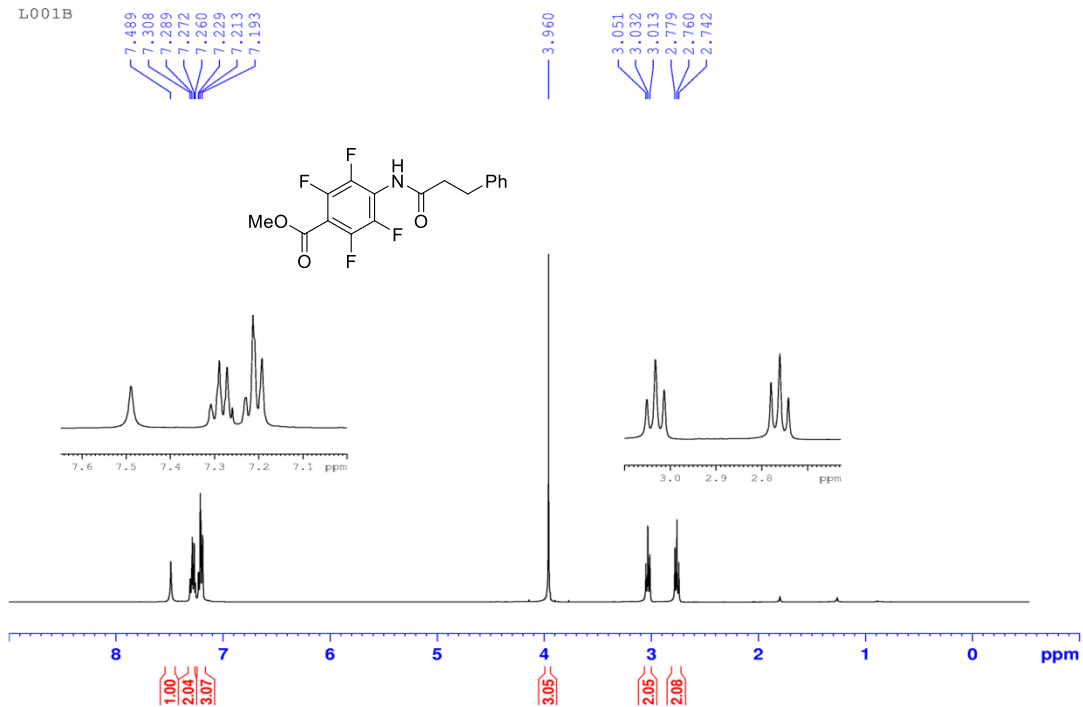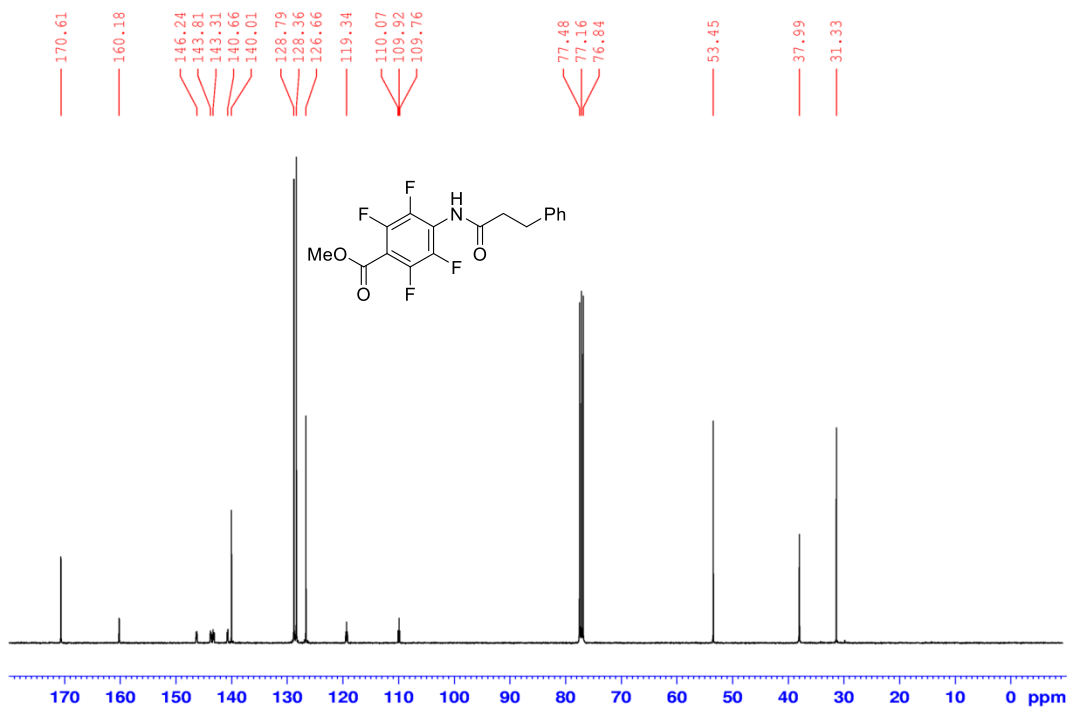

C13-NMR L055 CDC13 100MHz

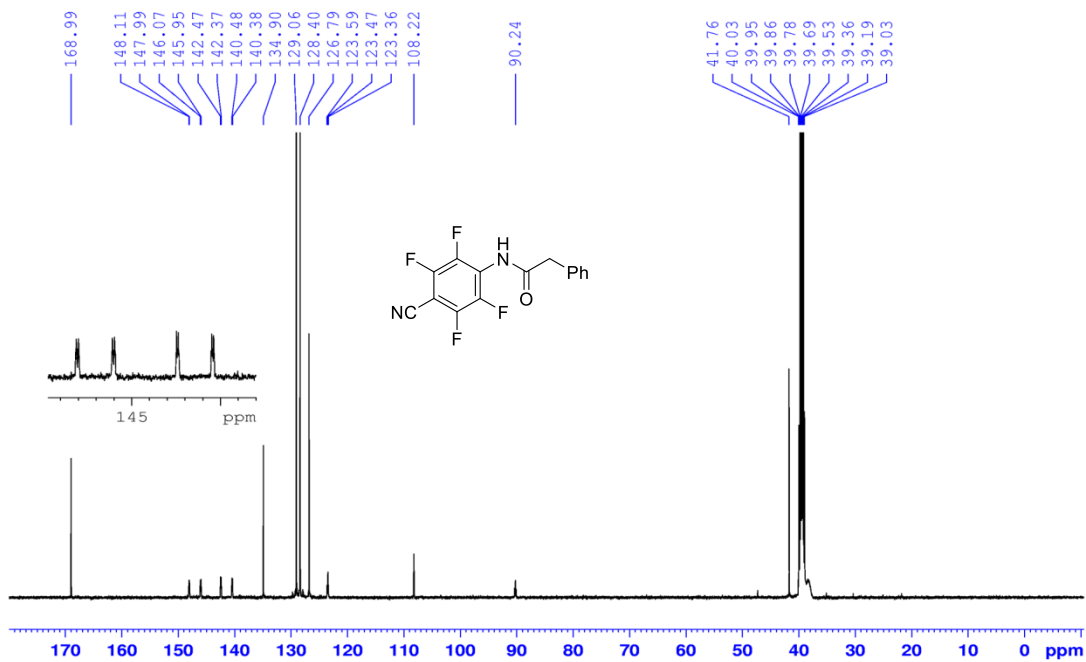

H-NMR L055

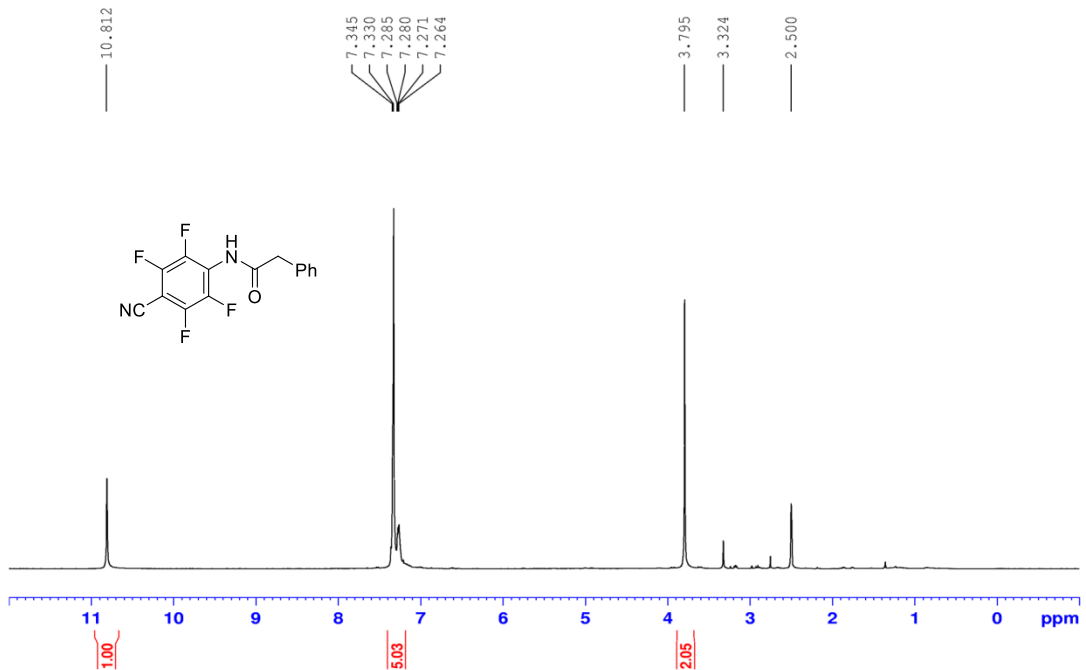

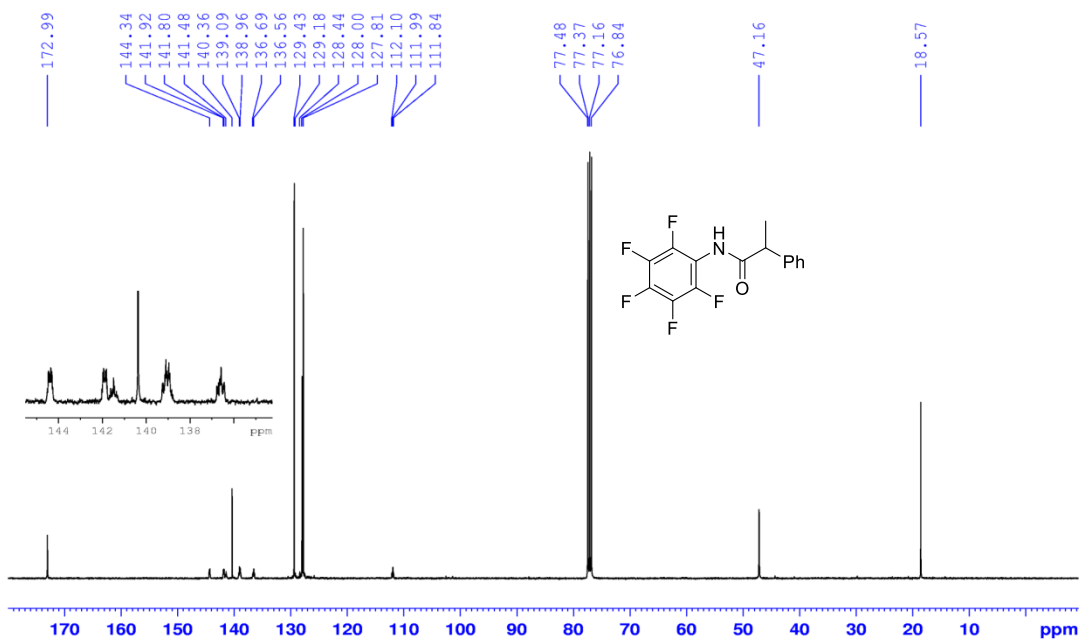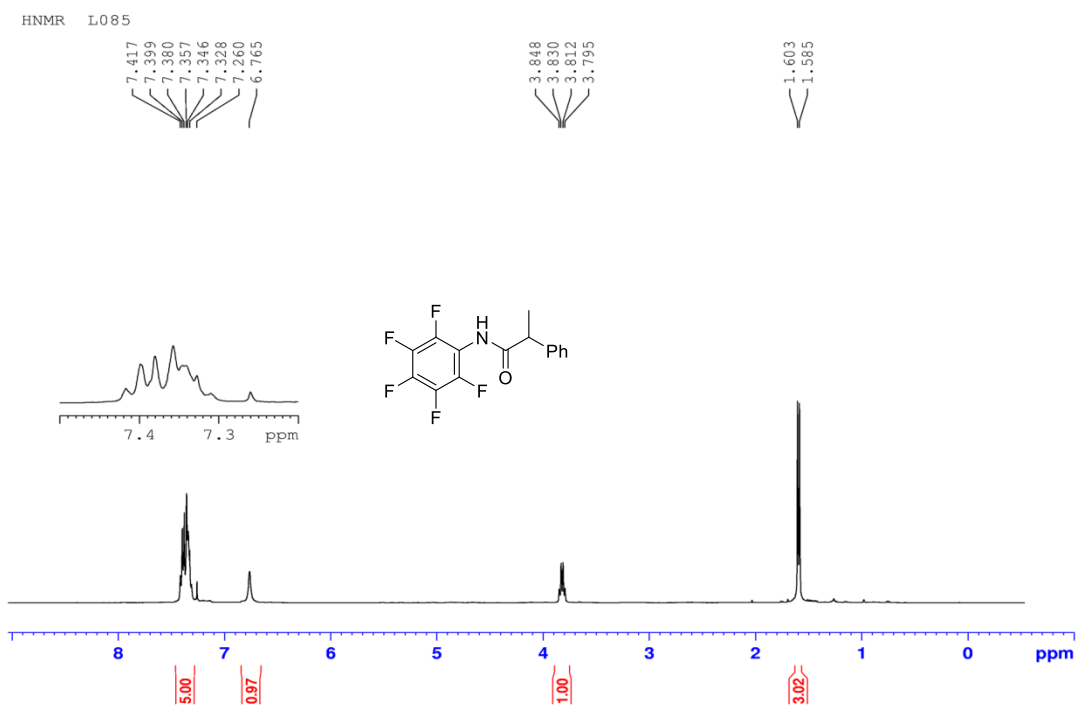



C13-NMR L054B CDC13 100MHz

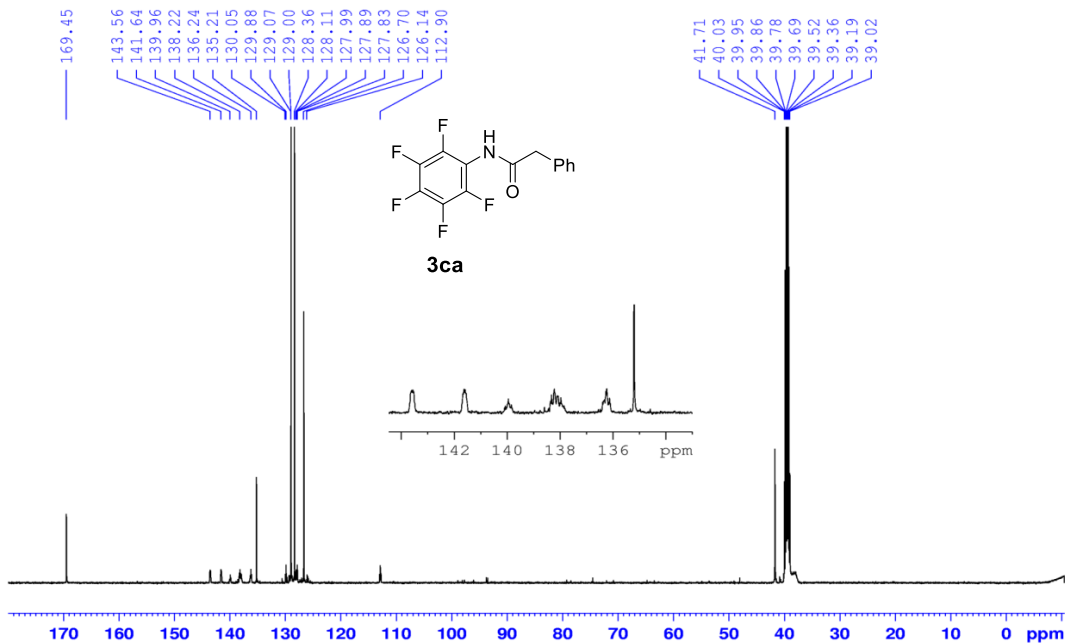

H-NMR L054B DMSO 400MHz

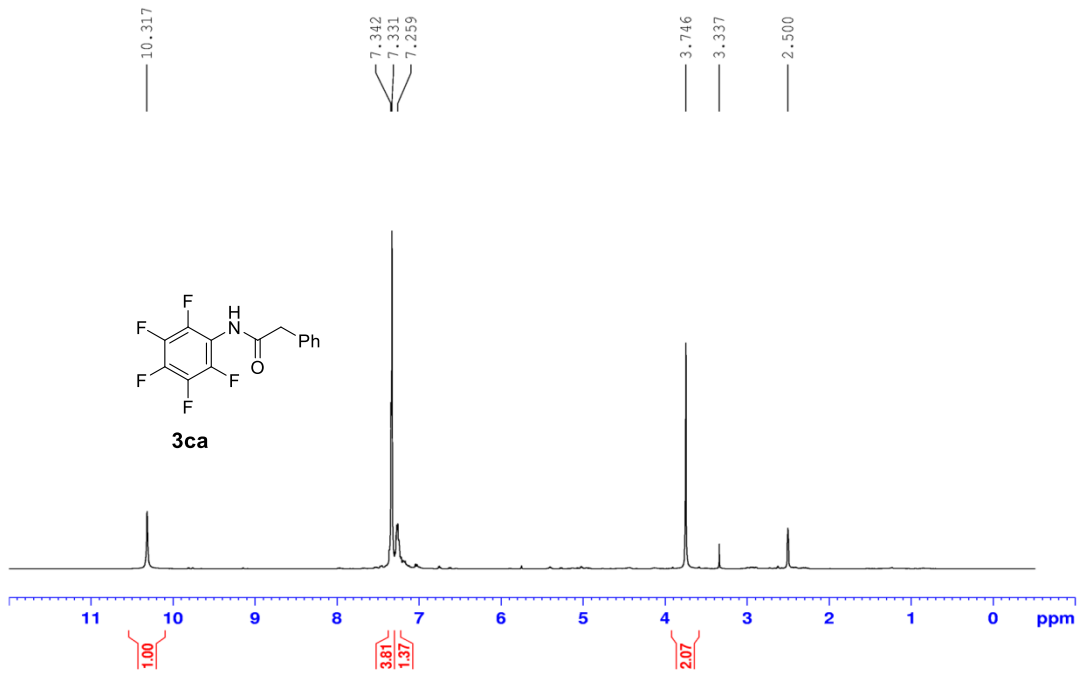

CNMR L089

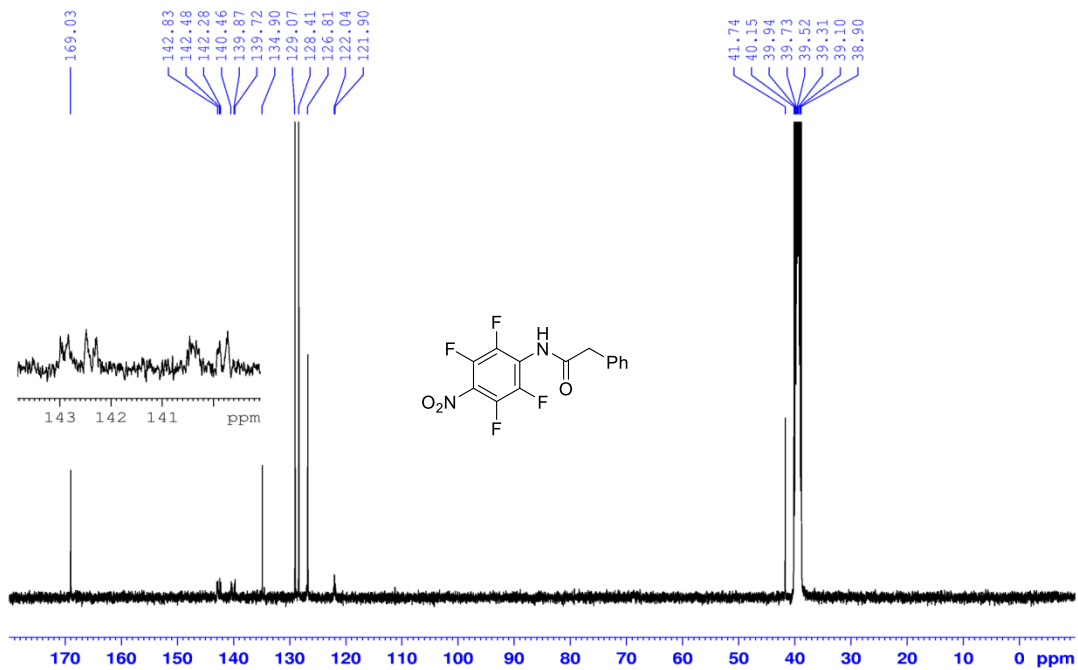

HNMR L089

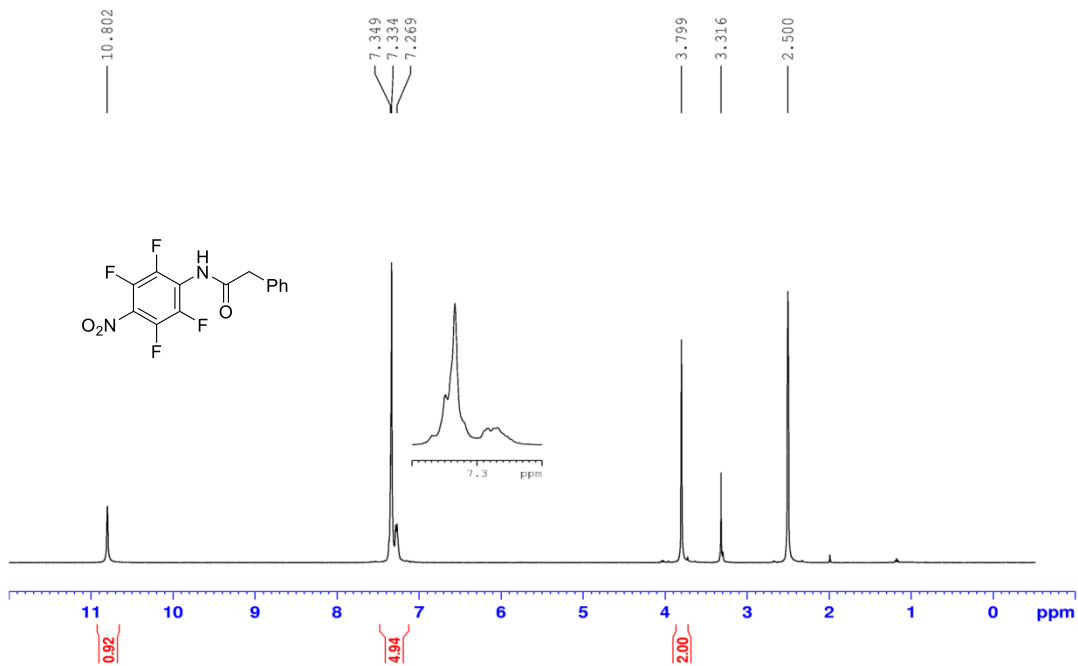

C-NMR L056

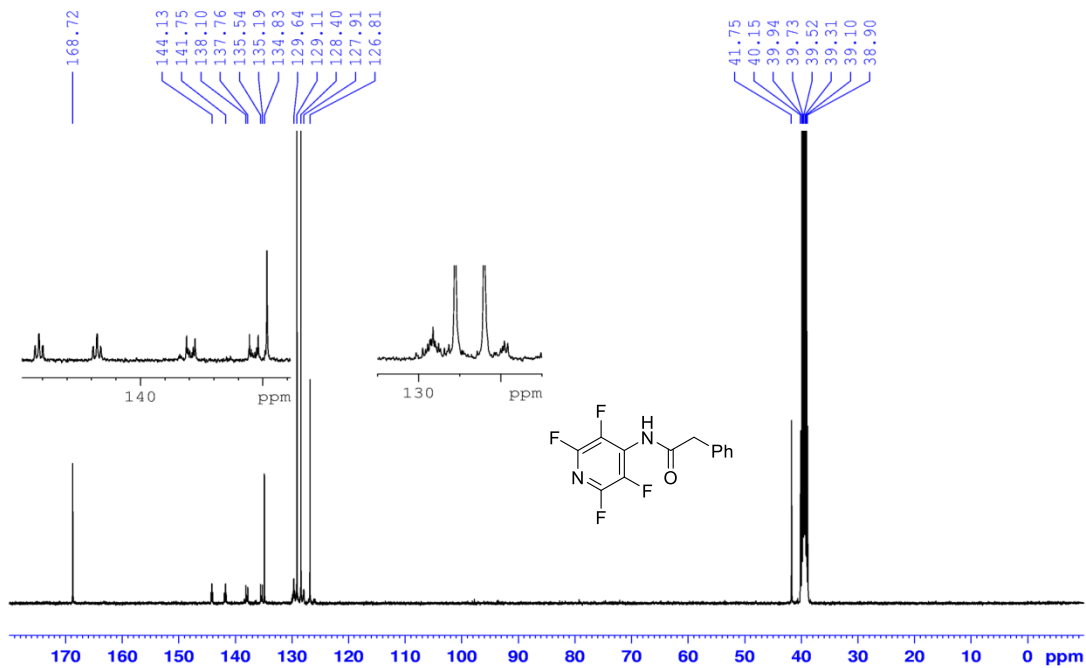

H-NMR L056

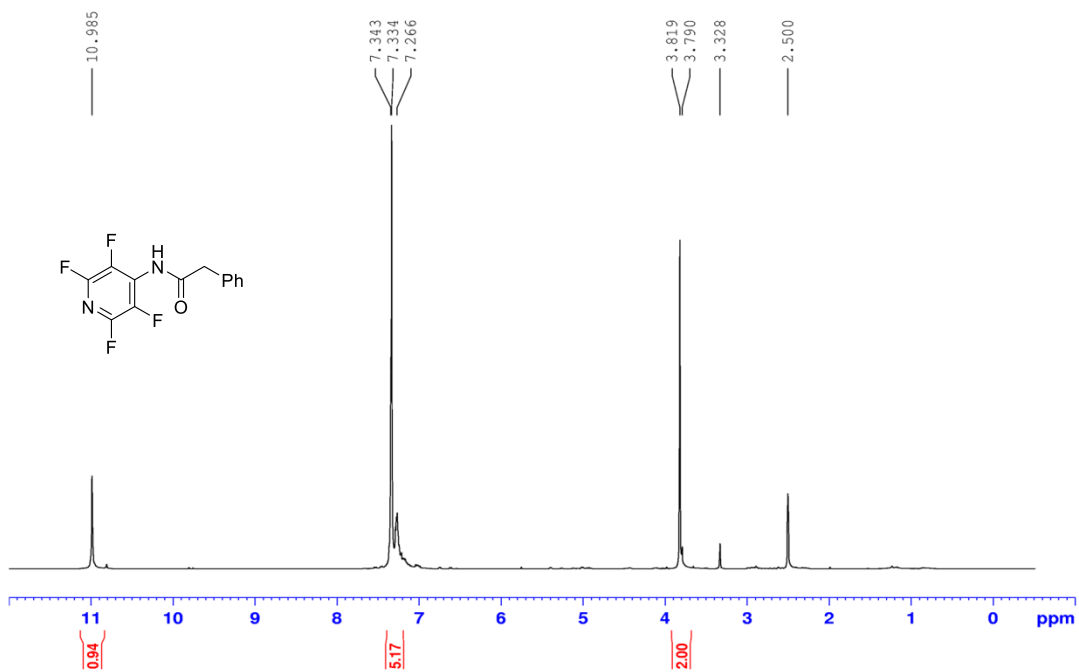

CNMR L083A

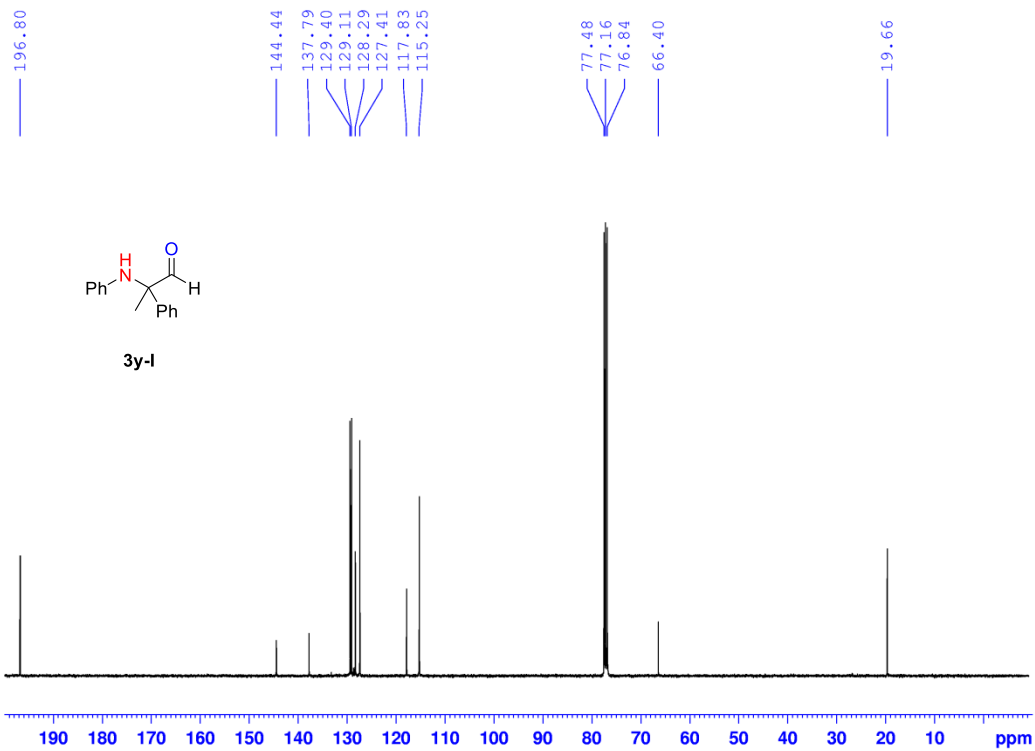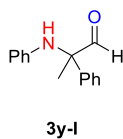

HNMR L083A

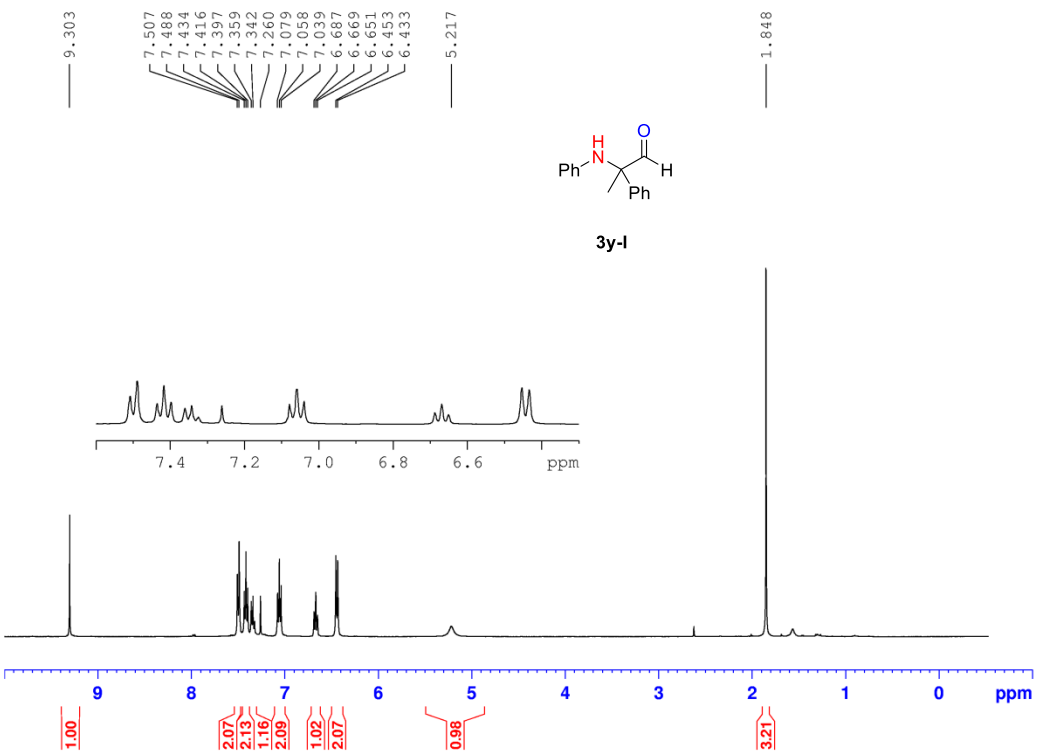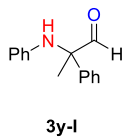

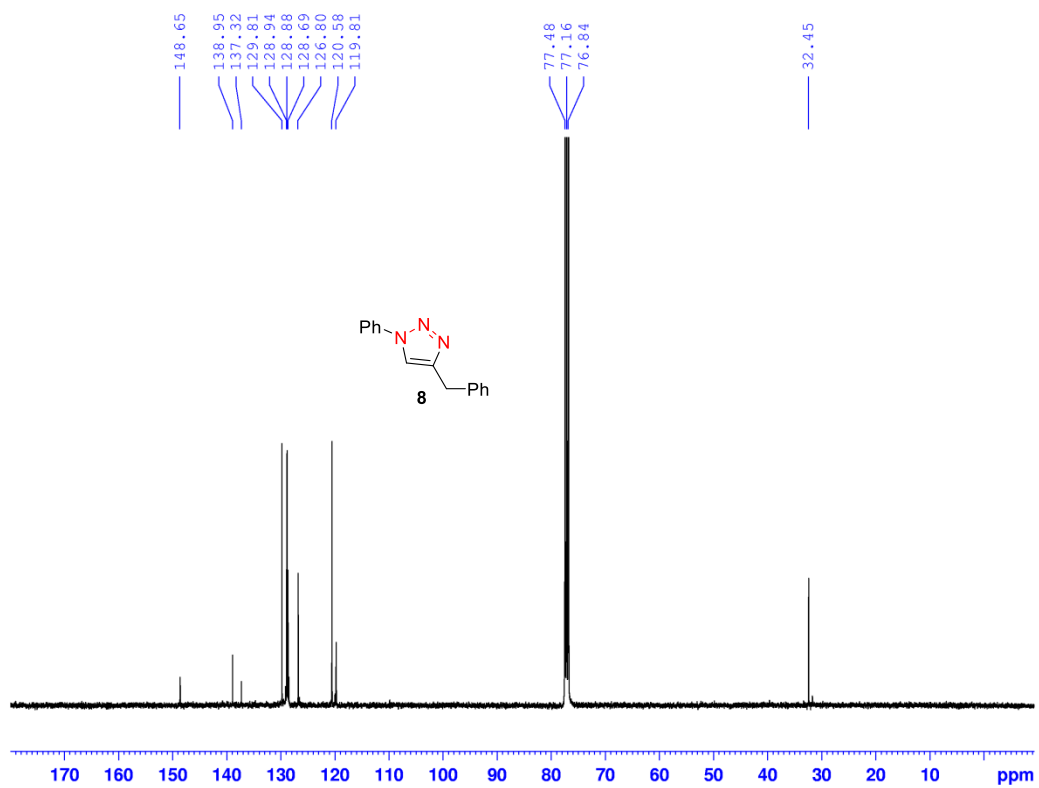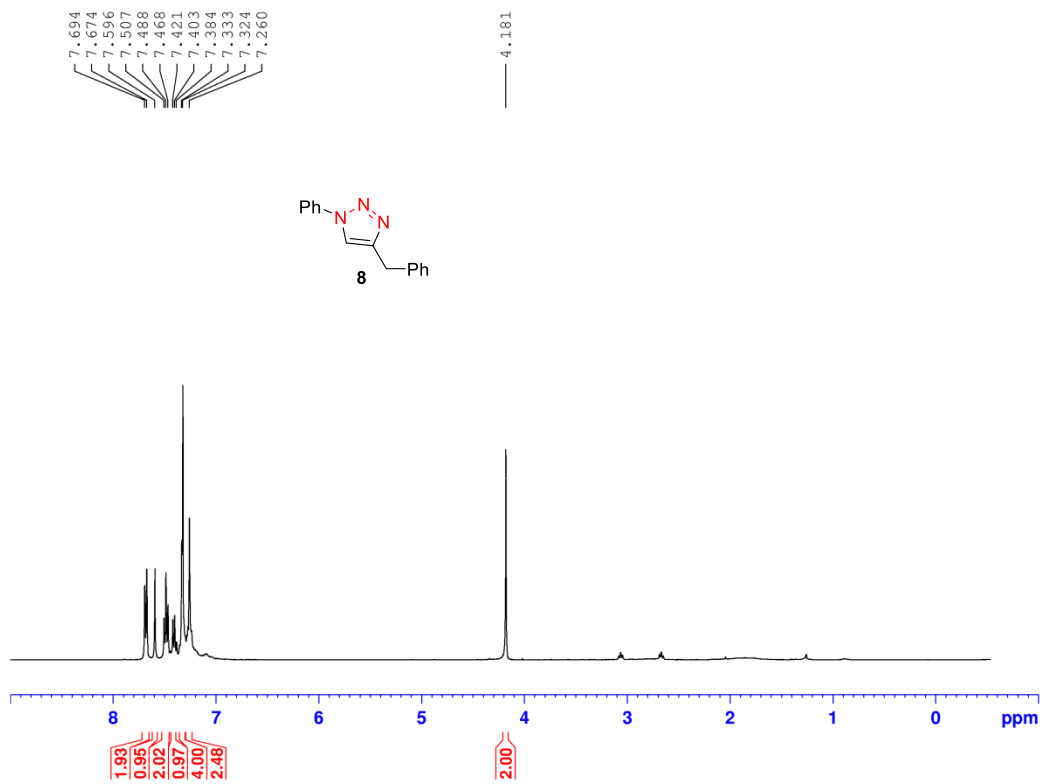

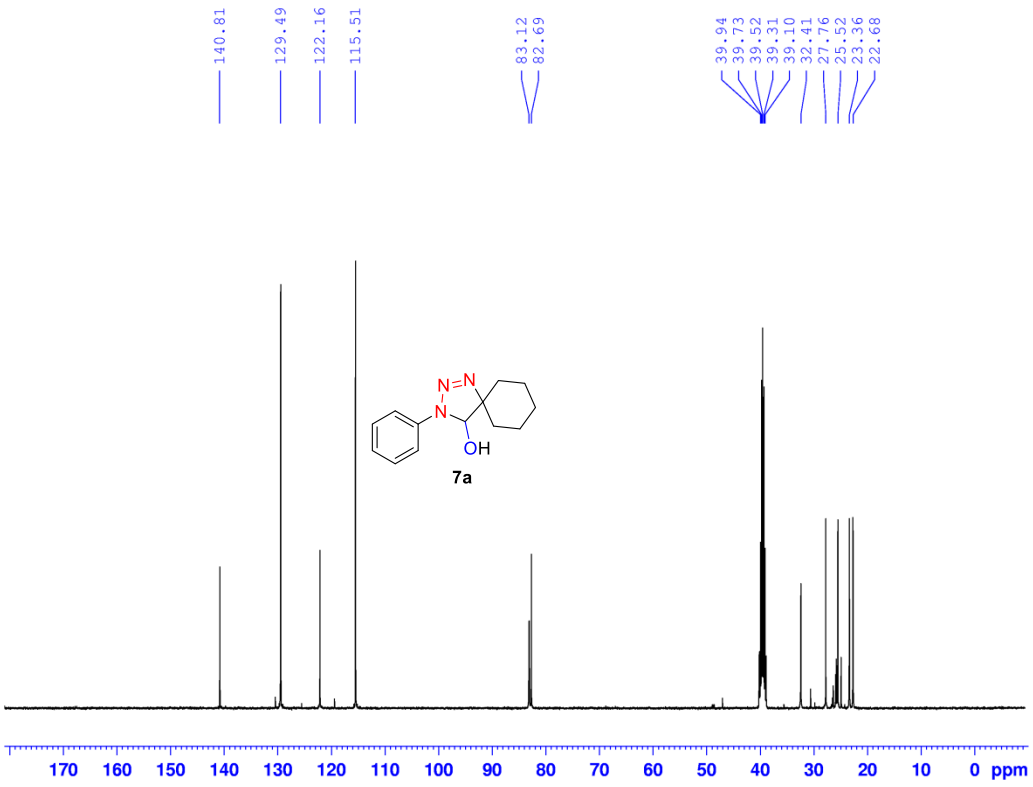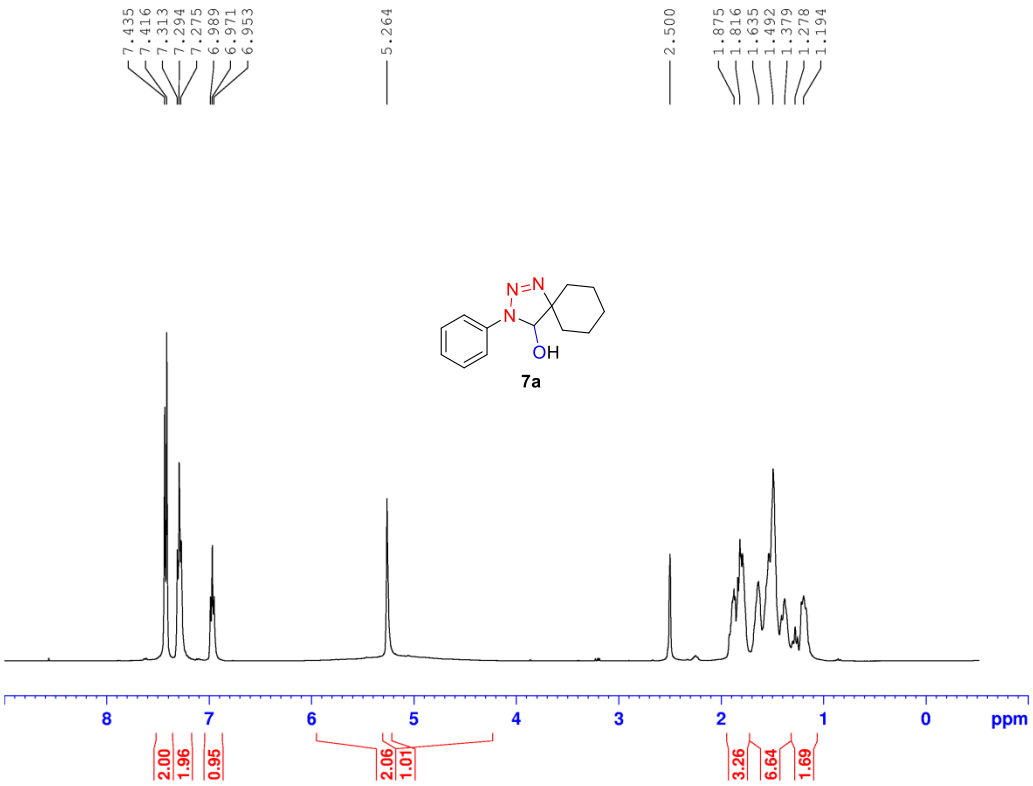

Supplement: c5sc03510d1.pdf [file c5sc03510d1.pdf]
